# Supplementary material for: Differential View on the Bile Acid Stress Response of Clostridioides difficile
Source: Front Microbiol. 2019 Feb 18;10:258. doi: 10.3389/fmicb.2019.00258 (PMC6387971; doi:10.3389/fmicb.2019.00258)
Supplement: Supplementary file 1 [file Table_1.XLSX]

## Sheet: shock
Table S1: Quantitative values of proteins identified in the bile acid shock experiment at control and the four stress conditions (CA, CDCA, DCA and LCA) for all 3 replicates.
accession number	gene	function	CA1	CA2	CA3	CDCA1	CDCA2	CDCA3	DCA1	DCA2	DCA3	LCA1	LCA2	LCA3	CON1	CON2	CON3
CDIF630erm_00001	dnaA	chromosomal replication initiator protein	0.00469821	0.00351714	0.00632445	0.0047442	0.00466425	0.00474403	0.00497838	0.00344788	0.00504578	0.00325667	0.00563734	0.00551325	0.005415	0.00425433	0.0056088
CDIF630erm_00002	dnaN	DNA polymerase III subunit beta	0.0117834	0.00965607	0.0108727	0.0111243	0.00843013	0.00668749	0.006495	0.00938549	0.00878741	0.0080088	0.00957772	0.00813413	0.0249499	0.0147668	0.0133762
CDIF630erm_00005	gyrB	DNA gyrase subunit B	0.014467	0.0136016	0.0114581	0.00773811	0.00976932	0.0101613	0.013123	0.0146125	0.0123939	0.0112945	0.0103302	0.0140648	0.014548	0.0121487	0.0159356
CDIF630erm_00006	gyrA	DNA gyrase subunit A	0.00652124	0.010783	0.0105867	0.0114298	0.00934761	0.00803329	0.00869008	0.0101869	0.00971694	0.00426341	0.00910516	0.00920909	0.0113328	0.0104056	0.00901975
CDIF630erm_00007		putative spore protein	0.0041124	0.00752176	0.00783454	0.00609508	0.00886857	0.0108127	0.00805176	0.00751583	0.00587641	0.008139	0.00629518	0.00535643	0.0072345	0.00673377	0.00634769
CDIF630erm_00009	rsbV	anti-sigma factor antagonist	0.012112	0.0128274	0.0149853	0.0146879	0.01031	0.00832433	0.0122752	0.00984377	0.0148723	0.00942362	0.0121112	0.00999443	0.0166284	0.0162317	0.0166272
CDIF630erm_00010	rsbW	serine-protein kinase RsbW	0.0129874	0.0123961	0.0160351	0.0138028	0.00938607	0.0124045	0.0125698	0.0102428	0.0133534	0.0114135	0.0109506	0.01185	0.0125534	0.0141881	0.0151275
CDIF630erm_00024	serS1	serine--tRNA ligase	0.0252623	0.02079	0.0237867	0.0207328	0.0310603	0.0240661	0.0202287	0.0287051	0.0276306	0.0223863	0.0296217	0.0275219	0.0213771	0.0246707	0.0248881
CDIF630erm_00031	ybaB	nucleoid-associated protein YbaB	0.0342928	0.0464314	0.0424455	0.0577935	0.0407069	0.0279972	0.0430568	0.03836	0.0411034	0.0430181	0.0431004	0.0411584	0.0345464	0.0402172	0.0371746
CDIF630erm_00032	recR	recombination protein RecR	0.00823757	0.00787866	0.00634605	0.00268363	0.00457166	0.0060624	0.00856278	0.0075808	0.00509676	0.00599799	0.011041	0.0035813	0.00769042	0.00729625	0.00589243
CDIF630erm_00083	pycA	pyruvate carboxylase	0.0116512	0.0135788	0.0113947	0.0177028	0.0207957	0.0220964	0.0110395	0.0120152	0.0115843	0.0120924	0.0143499	0.0131195	0.00535495	0.00740553	0.00467371
CDIF630erm_00084	fusA1	elongation factor G (EF-g)	0.0207551	0.0200763	0.020091	0.0111969	0.0142812	0.0116331	0.0144841	0.0149022	0.0184342	0.00651535	0.0151877	0.00510474	0.00962861	0.0188841	0.0135415
CDIF630erm_00087	mcsB	protein-arginine kinase	0.00105971	0.000647519	0.00139799	0.00274667	0.0037862	0.00315379	0.00126974	0.00193959	0.00206121	0.0139704	0.0188129	0.0185868	0.0017278	0.00129561	0.00179881
CDIF630erm_00088	clpC	class III stress response-related ATPase, AAA+ superfamily	0.0051971	0.0061202	0.00566887	0.00531412	0.00752345	0.0108249	0.00577828	0.00511038	0.00555306	0.0294143	0.0311078	0.0369009	0.00399437	0.0046727	0.00370969
CDIF630erm_00091		putative membrane protein	0.0131082	0.0124433	0.0129826	0.0089572	0.0120943	0.00777731	0.0105825	0.0128763	0.0121641	0.0078338	0.00858387	0.0127607	0.0112381	0.0122877	0.0117222
CDIF630erm_00110	ispF	2-C-methyl-D-erythritol 2,4-cyclodiphosphate synthase	0.00252332	0.00404957	0.0027667	0.00598465	0.00263362	0.00188701	0.00201914	0.00280223	0.00244901	0.00539887	0.00260246	0.00165443	0.00297335	0.00342845	0.00280786
CDIF630erm_00112	proS1	proline--tRNA ligase	0.0583167	0.057398	0.0553352	0.0610706	0.0350325	0.056021	0.0339018	0.0390531	0.0348262	0.0530636	0.0467789	0.0438491	0.0933924	0.113522	0.101931
CDIF630erm_00113	proS2	proline--tRNA ligase	0.209105	0.200537	0.240922	0.130503	0.176495	0.184568	0.151644	0.191498	0.161331	0.206812	0.19543	0.184138	0.251017	0.286893	0.275118
CDIF630erm_00114	gltX	glutamate--tRNA ligase	0.0107187	0.00815409	0.00958188	0.00991199	0.00790435	0.00960571	0.0115051	0.0109089	0.0104589	0.00942246	0.00901841	0.0084701	0.0130552	0.00802598	0.00985109
CDIF630erm_00116	cysS	cysteine--tRNA ligase	0.027113	0.0257234	0.0307965	0.0156118	0.031984	0.0196281	0.0229914	0.0318261	0.0252971	0.0252998	0.0226005	0.025121	0.0298128	0.0313554	0.0260528
CDIF630erm_00118	thyX	thymidylate synthase (FAD)	0.00974918	0.0108535	0.0114341	0.0101481	0.00811296	0.0086745	0.00972891	0.00871797	0.00679005	0.0067646	0.00854809	0.012834	0.0106059	0.0117547	0.00964906
CDIF630erm_00119		putative tRNA / rRNA methyltransferase, TrmH family, group3	0.00183798	0.000846501	0.00201326	0.0032233	0.00123191	0.00242614	0.00182024	0.00117869	0.00205361	0.00159178	0.00393861	0.00154411	0.00200068	0.00213854	0.00139862
CDIF630erm_00122	tuf1	elongation factor EFTu / EF1A	0.460787	0.545629	0.539194	0.250002	0.464559	0.552936	0.541239	0.35098	0.522462	0.597952	0.462317	0.511625	0.514327	0.641863	0.535897
CDIF630erm_00123	rpmG	50S ribosomal protein L33	0.0677564	0.143094	0.113689	0.219901	0.0675624	0.101732	0.111837	0.0868677	0.0673259	0.150185	0.139183	0.0691739	0.101742	0.132222	0.15711
CDIF630erm_00125	nusG	transcription antitermination protein	0.0287399	0.0326482	0.0268327	0.0185496	0.0266499	0.0270694	0.0258217	0.0245045	0.0235571	0.0270962	0.0246748	0.0219553	0.0275081	0.0279536	0.0278543
CDIF630erm_00126	rplK	50S ribosomal protein L11	0.114689	0.1076	0.110789	0.0708044	0.103522	0.119151	0.107296	0.120666	0.0828021	0.11468	0.0988059	0.0979718	0.111606	0.116511	0.111013
CDIF630erm_00127	rplA	50S ribosomal protein L1	0.130635	0.111628	0.153841	0.0527191	0.113141	0.129392	0.104107	0.100298	0.115967	0.114065	0.0842953	0.125233	0.101527	0.118167	0.161728
CDIF630erm_00129	rplJ	50S ribosomal protein L10	0.113238	0.101202	0.0781074	0.0288306	0.058548	0.089674	0.0667265	0.0733128	0.0512995	0.0778934	0.0455086	0.0592663	0.128314	0.071155	0.112612
CDIF630erm_00130	rplL	50S ribosomal protein L7 / L12	0.209124	0.221228	0.20327	0.163785	0.200771	0.254172	0.193666	0.211891	0.130766	0.234002	0.291585	0.151884	0.213977	0.306378	0.279971
CDIF630erm_00131		NADP-dependent 7-alpha-hydroxysteroid dehydrogenase	0.0027295	0.00248286	0.00294081	0.00465735	0.00360093	0.00136489	0.00177504	0.00230621	0.00147786	0.00200035	0.00141013	0.00193205	0.00328072	0.00234275	0.00200895
CDIF630erm_00132	rpoB	DNA-directed RNA polymerase subunit beta	0.0361309	0.0369847	0.0346136	0.0554103	0.0424566	0.0368678	0.0341343	0.0406913	0.0371728	0.0341002	0.0387719	0.0359863	0.0437361	0.0342367	0.0426983
CDIF630erm_00133	rpoC	DNA-directed RNA polymerase subunit beta*	0.0247763	0.027522	0.0232223	0.040378	0.0256409	0.0210493	0.0287696	0.0335568	0.0319831	0.0169774	0.0329318	0.0315409	0.0293302	0.0229804	0.0259065
CDIF630erm_00134	rpsL	30S ribosomal protein S12	0.0602792	0.0570635	0.0765658	0.15544	0.0664981	0.0656112	0.0594956	0.0685694	0.0660902	0.063284	0.0633319	0.0559589	0.04665	0.0739093	0.0883247
CDIF630erm_00135	rpsG	30S ribosomal protein S7	0.192268	0.156503	0.187519	0.222492	0.168437	0.182703	0.164628	0.167992	0.181327	0.137754	0.181591	0.159088	0.199186	0.172143	0.193956
CDIF630erm_00136	fusA2	elongation factor G (EF-g)	0.217622	0.200763	0.212236	0.241437	0.192791	0.191876	0.184259	0.186237	0.190826	0.202877	0.192602	0.190352	0.230104	0.23447	0.229367
CDIF630erm_00138	rpsJ	30S ribosomal protein S10	0.123908	0.118426	0.125611	0.155359	0.144562	0.114169	0.116163	0.117274	0.11765	0.105716	0.118906	0.114147	0.120102	0.130965	0.121387
CDIF630erm_00139	rplC	50S ribosomal protein L3	0.18003	0.20592	0.207678	0.1359	0.173257	0.16887	0.165696	0.178531	0.165447	0.16956	0.141897	0.156412	0.188807	0.212637	0.161528
CDIF630erm_00140	rplD	50S ribosomal protein L4	0.143839	0.108975	0.119198	0.0413127	0.137021	0.144993	0.0988419	0.117006	0.0822572	0.0908532	0.0749569	0.0831353	0.159598	0.146583	0.136715
CDIF630erm_00141	rplW	50S ribosomal protein L23	0.0961789	0.0961892	0.0985357	0.177072	0.0872093	0.089463	0.0669089	0.0902994	0.0699549	0.0896761	0.114564	0.0848136	0.087478	0.0983751	0.120665
CDIF630erm_00142	rplB	50S ribosomal protein L2	0.132536	0.123398	0.124164	0.0632134	0.132948	0.0874602	0.141057	0.113351	0.122268	0.123448	0.121856	0.115194	0.102894	0.123056	0.147616
CDIF630erm_00143	rpsS	30S ribosomal protein S19	0.124585	0.144965	0.136807	0.0885252	0.154623	0.138521	0.0872717	0.154277	0.116872	0.0779105	0.0571534	0.126783	0.115917	0.140446	0.123677
CDIF630erm_00144	rplV	50S ribosomal protein L22	0.0592781	0.085788	0.133974	0.0421228	0.0718081	0.11987	0.0518203	0.0550036	0.0966408	0.0643968	0.0534076	0.107569	0.0472466	0.0646521	0.134562
CDIF630erm_00145	rpsC	30S ribosomal protein S3	0.152343	0.190186	0.160716	0.13885	0.192719	0.150888	0.161495	0.177274	0.182464	0.1207	0.133008	0.169348	0.176525	0.187244	0.154429
CDIF630erm_00146	rplP	50S ribosomal protein L16	0.0352826	0.0333666	0.0337121	0.00275368	0.029894	0.0401459	0.0354379	0.0404623	0.0280459	0.0251096	0.0175448	0.0413135	0.0443535	0.0371916	0.0496441
CDIF630erm_00147	rpmC	50S ribosomal protein L29	0.174988	0.143863	0.147296	0.125996	0.165471	0.146496	0.135598	0.158984	0.150503	0.164355	0.158649	0.160374	0.183566	0.158412	0.179588
CDIF630erm_00148	rpsQ	30S ribosomal protein S17	0.080859	0.106085	0.0982725	0.163133	0.0801839	0.0773161	0.096313	0.0789621	0.0668045	0.100178	0.0789744	0.0580679	0.0666736	0.0981364	0.094103
CDIF630erm_00149	rplN	50S ribosomal protein L14	0.0740923	0.0519221	0.0501436	0.0774734	0.0644711	0.0500838	0.0466894	0.0538186	0.0295701	0.0422037	0.0498184	0.0419451	0.0642566	0.0533279	0.054585
CDIF630erm_00150	rplX	50S ribosomal protein L24	0.166635	0.17656	0.150427	0.0521873	0.141391	0.136555	0.149231	0.145302	0.145885	0.200149	0.184788	0.138373	0.185976	0.180327	0.148285
CDIF630erm_00151	rplE	50S ribosomal protein L5	0.135005	0.205726	0.176072	0.165102	0.128253	0.164901	0.18479	0.156542	0.131213	0.190558	0.168922	0.130014	0.167644	0.201436	0.17169
CDIF630erm_00153	rpsH	30S ribosomal protein S8	0.15096	0.148422	0.161407	0.182582	0.158331	0.165502	0.163656	0.160246	0.184419	0.171198	0.140971	0.169032	0.172405	0.168899	0.178922
CDIF630erm_00154	rplF	50S ribosomal protein L6	0.124889	0.122336	0.13612	0.142619	0.114821	0.116968	0.0847258	0.102055	0.0997276	0.118053	0.151958	0.114362	0.121626	0.154481	0.146718
CDIF630erm_00155	rplR	50S ribosomal protein L18	0.194308	0.206116	0.213418	0.166574	0.179615	0.182736	0.184231	0.186981	0.177004	0.175871	0.139946	0.171728	0.245425	0.21477	0.225599
CDIF630erm_00156	rpsE	30S ribosomal protein S5	0.113188	0.081549	0.0870132	0.10417	0.0845489	0.124468	0.101735	0.120692	0.0924343	0.1146	0.132711	0.0995629	0.155873	0.109822	0.129236
CDIF630erm_00157	rpmD	50S ribosomal protein L30	0.10582	0.105935	0.0843135	0.0270114	0.102103	0.0841057	0.105178	0.128653	0.0702596	0.0959176	0.089266	0.0910475	0.127072	0.0826479	0.153343
CDIF630erm_00158	rplO	50S ribosomal protein L15	0.155335	0.162432	0.166847	0.213541	0.133857	0.159006	0.130836	0.147946	0.155006	0.14256	0.182199	0.15684	0.181251	0.169703	0.195214
CDIF630erm_00159	secY	preprotein translocase SecY subunit	0.0032256	0.00474827	0.00403893	0.00422174	0.00338959	0.00563656	0.00383784	0.00616793	0.00231431	0.002183	0.00310013	0.00420406	0.0036708	0.00292627	0.00353659
CDIF630erm_00160	adk	adenylate kinase	0.046154	0.0500728	0.0452419	0.050812	0.0520538	0.0608212	0.0477996	0.0604291	0.0485067	0.0544291	0.0604532	0.045452	0.0455415	0.0652001	0.0578836
CDIF630erm_00161	map1	methionine aminopeptidase	0.00910393	0.0072924	0.00771185	0.00261555	0.00945216	0.0085269	0.00714676	0.00755712	0.00786876	0.00783342	0.00651698	0.00942321	0.00745697	0.00677315	0.00765831
CDIF630erm_00163	infA	translation initiation factor IF-1	0.00944177	0.0117397	0.00927271	0.00586393	0.0108851	0.0122194	0.0103297	0.013941	0.0122576	0.00922124	0.00910082	0.00733983	0.0104799	0.0120315	0.014326
CDIF630erm_00164	rpmJ	50S ribosomal protein L36	0.0519609	0.0376086	0.062958	0.163383	0.0713733	0.0580269	0.0573347	0.0635654	0.0585821	0.058812	0.0573985	0.0680468	0.0436023	0.0450615	0.0618168
CDIF630erm_00165	rpsM	30S ribosomal protein S13	0.117835	0.133117	0.134001	0.127304	0.123375	0.103455	0.13262	0.112386	0.112993	0.109878	0.103722	0.1127	0.115362	0.127544	0.121666
CDIF630erm_00166	rpsK	30S ribosomal protein S11	0.0682194	0.0777199	0.0518568	0.0481195	0.090072	0.059149	0.0777268	0.0948551	0.0460664	0.0682536	0.0496485	0.0576447	0.0903454	0.0674379	0.0670719
CDIF630erm_00167	rpsD	30S ribosomal protein S4	0.165679	0.170717	0.17238	0.226171	0.13119	0.149659	0.154153	0.163391	0.128376	0.141704	0.225882	0.144894	0.181125	0.180469	0.199268
CDIF630erm_00168	rpoA	DNA-directed RNA polymerase subunit alpha	0.0804898	0.0872413	0.0845047	0.0893559	0.097219	0.0783654	0.0724257	0.0909069	0.0832022	0.0800553	0.0946842	0.0764947	0.0891934	0.0828844	0.0906835
CDIF630erm_00169	rplQ	50S ribosomal protein L17	0.0564887	0.0737108	0.0845758	0.042085	0.0634954	0.0695919	0.085197	0.101254	0.0759794	0.0748405	0.0834667	0.068292	0.0412786	0.104139	0.0912052
CDIF630erm_00170	ecfA1	energy-coupling factor transporter ATP-binding protein EcfA1	0.000670339	0.00122679	0.00139927	0.00113897	0.0020786	0.00146332	0.00180977	0.00253866	0.00219455	0.00157777	0.000800355	0.00120544	0.00104653	0.00148886	0.00175739
CDIF630erm_00171	ecfA2	energy-coupling factor transporter ATP-binding protein EcfA2	0.0019326	0.00257685	0.00252661	0.00323651	0.00156019	0.00197384	0.00236617	0.00341148	0.00339093	0.00175148	0.00432601	0.00392078	0.00190334	0.00318358	0.00188032
CDIF630erm_00174	rplM	50S ribosomal protein L13	0.134871	0.111527	0.10248	0.0659099	0.0794615	0.131896	0.093111	0.114941	0.0910091	0.0948377	0.076306	0.101329	0.13971	0.130175	0.116665
CDIF630erm_00175	rpsI	30S ribosomal protein S9	0.151636	0.117752	0.155314	0.241307	0.138199	0.168927	0.127558	0.129604	0.130756	0.141478	0.184505	0.128962	0.195867	0.152606	0.211039
CDIF630erm_00203	aspC	aspartate aminotransferase	0.0456775	0.0370364	0.0366141	0.0327659	0.0398837	0.0389805	0.0412892	0.0419461	0.0410554	0.0429876	0.0526851	0.0349307	0.0483825	0.0465272	0.0399512
CDIF630erm_00204	nrdD	anaerobic ribonucleoside triphosphate reductase	0.0156089	0.0149139	0.0138969	0.00933273	0.00822248	0.0132036	0.012228	0.0126117	0.00752872	0.00873869	0.00704136	0.0102499	0.00991303	0.0127831	0.0133779
CDIF630erm_00227	ptb1	phosphate butyryltransferase	0.0246511	0.0210203	0.0174209	0.0305057	0.0270755	0.0146517	0.025184	0.0289443	0.0227341	0.0222054	0.0219487	0.0190876	0.0154148	0.0150768	0.0176044
CDIF630erm_00228	buk	butyrate kinase	0.0529538	0.0498243	0.0432099	0.0491659	0.0494944	0.0419	0.0422641	0.0395869	0.0608553	0.0450726	0.037732	0.0400657	0.0488782	0.0411961	0.0389384
CDIF630erm_00230	vorC1	3-methyl-2-oxobutanoate dehydrogenase (ferredoxin), gamma subunit (ferredoxin)	0.0852954	0.079582	0.0849199	0.0775888	0.0851417	0.0825718	0.0864508	0.0756792	0.0705558	0.07731	0.0794102	0.0679257	0.0589713	0.0689552	0.064683
CDIF630erm_00231	vorB1	3-methyl-2-oxobutanoate dehydrogenase (ferredoxin), beta subunit	0.0766608	0.0787358	0.0889517	0.14445	0.102403	0.0792826	0.0947238	0.0865688	0.107888	0.0876624	0.0851061	0.0969538	0.0541839	0.0565308	0.058084
CDIF630erm_00232	vorA1	3-methyl-2-oxobutanoate dehydrogenase (ferredoxin), alpha subunit	0.0741243	0.0772067	0.0629565	0.178388	0.0779957	0.0617964	0.0822348	0.088608	0.0775397	0.0695666	0.0717777	0.060512	0.0544451	0.0579117	0.0671981
CDIF630erm_00233	vorA*1	3-methyl-2-oxobutanoate dehydrogenase (ferredoxin), alpha subunit N-terminal region	0.075502	0.0781555	0.0709268	0.0559146	0.114173	0.0664602	0.0838287	0.0880779	0.106969	0.0813184	0.0552104	0.0851722	0.0542148	0.0521468	0.0503821
CDIF630erm_00234	glmM	phosphoglucosamine mutase	0.0231698	0.0207404	0.0197369	0.0230102	0.0281405	0.0189524	0.0194126	0.0243871	0.0240116	0.0142283	0.0211387	0.0245022	0.0246592	0.0198757	0.0173227
CDIF630erm_00236	glmS	glucosamine--fructose-6-phosphate aminotransferase [isomerizing]	0.0515706	0.0468632	0.0576062	0.0535993	0.0441208	0.0421795	0.0496916	0.052439	0.0638726	0.0552527	0.0486058	0.0464448	0.0427862	0.0425965	0.0428467
CDIF630erm_00239	murA	UDP-N-acetylglucosamine 1-carboxyvinyltransferase	0.019609	0.0166864	0.0181245	0.0156026	0.019987	0.0175343	0.0138999	0.0196227	0.0131676	0.0172566	0.0168493	0.0193631	0.0172456	0.0199432	0.0212183
CDIF630erm_00243	mreB1	rod shape-determining protein MreB	0.00908017	0.00455796	0.0113581	0.00515514	0.00994054	0.0123909	0.0117525	0.0116118	0.00976625	0.00635413	0.00815616	0.011146	0.00940714	0.0116532	0.00838146
CDIF630erm_00244	fabZ	(3R)-hydroxymyristoyl-[acyl-carrier-protein] dehydratase	0.00804294	0.00586415	0.00753695	0.00646105	0.00754011	0.00644248	0.00660824	0.00744647	0.00617123	0.00422011	0.00785182	0.00579437	0.00831249	0.00612532	0.00752112
CDIF630erm_00247	metK	S-adenosylmethionine synthetase	0.0275045	0.0225194	0.0233709	0.0375769	0.0287267	0.0265603	0.026876	0.0281014	0.0235301	0.0351521	0.0388974	0.026115	0.0270229	0.0238489	0.0258975
CDIF630erm_00259		putative RNA-binding protein	0.0377053	0.0403348	0.0406725	0.017575	0.0352084	0.0285383	0.0357328	0.0264778	0.0342676	0.0177763	0.0152311	0.01403	0.0278435	0.0322612	0.0289199
CDIF630erm_00260	secA1	protein translocase subunit SecA1	0.0111976	0.0135933	0.0124305	0.0159929	0.0139021	0.0107084	0.0127735	0.0163577	0.0160318	0.00882324	0.0169204	0.0152453	0.011798	0.011908	0.0112561
CDIF630erm_00263		putative S1 RNA-binding domain-containing protein	0.00598469	0.00321282	0.00996988	0.0066113	0.0117465	0.00260257	0.0102719	0.00711809	0.00230226	0.00607582	0.00852506	0.00469525	0.00331863	0.00247087	0.00929065
CDIF630erm_00264		putative metal-dependent hydrolase	0.00269469	0.00108315	0.00161353	0.00667122	0.00376739	0.00227545	0.00126433	0.00135833	0.00176331	0.00125611	0.00128978	0.000511229	0.00158517	0.00187501	0.00178811
CDIF630erm_00291		ABC-type transport system, ATP-binding protein	0.0019879	0.00145604	0.00240453	0.002252	0.00171683	0.00165164	0.00201735	0.00280496	0.00217254	0.00141436	0.00104013	0.00213645	0.00204486	0.00194182	0.00224189
CDIF630erm_00292	rex	transcriptional regulator, redox-sensing repressor Rex	0.025312	0.0201732	0.0239974	0.0299375	0.0225401	0.0177924	0.0205564	0.0310112	0.021591	0.0187701	0.0199238	0.0183999	0.026843	0.0208683	0.0173313
CDIF630erm_00296		putative CO dehydrogenase (NAD), catalytic subunit	0.00305292	0.00393233	0.00324534	0.00181169	0.00149028	0.00293463	0.00192537	0.00304483	0.00202594	0.00405817	0.00254319	0.00249997	0.00427978	0.00283836	0.0030001
CDIF630erm_00299	cfa	cyclopropane-fatty-acyl-phospholipid synthase	0.0161556	0.0155952	0.0109697	0.0329407	0.014775	0.0112335	0.0182973	0.0183341	0.0175005	0.0058971	0.011256	0.0137697	0.0106031	0.00515484	0.00637741
CDIF630erm_00301	gluD	glutamate dehydrogenase	0.237361	0.197063	0.18297	0.19725	0.201138	0.199216	0.222934	0.231266	0.202793	0.165613	0.191247	0.179939	0.234668	0.217753	0.212443
CDIF630erm_00306	pyrK	dihydroorotate dehydrogenase (NAD+), electron transfer subunit	0.00172268	0.00162134	0.00301977	0.00224404	0.00169754	0.00122018	0.00151338	0.00247201	0.0016663	0.00177243	0.00270259	0.00171283	0.00357624	0.0028757	0.00242842
CDIF630erm_00308	pyrE	orotate phosphoribosyltransferase	0.0141249	0.0115656	0.0232892	0.0049694	0.0120017	0.0196346	0.0106625	0.00868192	0.0124846	0.01786	0.0110839	0.00673965	0.0167096	0.0263272	0.0155678
CDIF630erm_00312		putative 8-oxoguanine-DNA-glycosylase	0.00508854	0.0049109	0.00416643	0.00881931	0.00367437	0.00430835	0.0042645	0.0026666	0.00514954	0.00620992	0.00579191	0.00564564	0.00402752	0.00497403	0.00296079
CDIF630erm_00314	groS	10 kDa chaperonin	0.101355	0.129126	0.153084	0.15472	0.174982	0.227009	0.10117	0.120883	0.126619	0.271113	0.286347	0.241747	0.103939	0.0935941	0.110859
CDIF630erm_00315	groL	60 kDa chaperonin	0.169771	0.167717	0.184922	0.250613	0.218971	0.237525	0.169617	0.161922	0.161324	0.298562	0.297453	0.289867	0.134601	0.143667	0.157328
CDIF630erm_00320	guaA	GMP synthase (glutamine-hydrolysing)	0.0756719	0.0592244	0.072428	0.0706142	0.0568954	0.0651552	0.058703	0.0633022	0.0561337	0.0653735	0.06935	0.0540164	0.0800803	0.0668758	0.0699442
CDIF630erm_00333		putative nucleotide-diphospho-sugar transferase	0.00179603	0.00180286	0.002794	0.00340083	0.0011251	0.00240212	0.00259841	0.0020604	0.00194549	0.00200279	0.00198811	0.0024284	0.00415912	0.00669933	0.00364819
CDIF630erm_00334		putative alkaline-phosphatase	0.00875621	0.00760012	0.0066694	0.00469806	0.00606159	0.00572226	0.0057626	0.00565412	0.0055933	0.00604068	0.00771794	0.00824833	0.0113474	0.0113207	0.0101478
CDIF630erm_00340	purE	5-(carboxyamino)imidazole ribonucleotide mutase	0.00393456	0.00174255	0.00205411	0.00130903	0.00394745	0.00243698	0.00202891	0.00683024	0.00381484	0.00254051	0.00417153	0.00204658	0.00183442	0.00244892	0.0047462
CDIF630erm_00342	purF	amidophosphoribosyltransferase	0.00273253	0.00387209	0.00290664	0.00387528	0.00231857	0.00262692	0.0155255	0.0148209	0.00337331	0.0077308	0.00262628	0.0026137	0.0103447	0.0036215	0.00421857
CDIF630erm_00343	purG	phosphoribosylformylglycinamidine cyclo-ligase	0.00310284	0.00262569	0.00387308	0.00330727	0.00248878	0.0022573	0.00261553	0.00347827	0.00222972	0.00445417	0.00551369	0.00193927	0.00348917	0.00372066	0.00318055
CDIF630erm_00345	purH	bifunctional phosphoribosylaminoimidazolecarboxamide formyltransferase / IMP cyclohydrolase	0.00178551	0.00490692	0.00309322	0.00435042	0.00358556	0.00671149	0.00423189	0.00352197	0.00751386	0.00405662	0.00358659	0.00501078	0.00455652	0.00361448	0.0059982
CDIF630erm_00347	purL	phosphoribosylformylglycinamidine synthase	0.00441987	0.00434729	0.00417304	0.0027522	0.00552352	0.00488485	0.00473436	0.00559972	0.00388772	0.00410432	0.00672186	0.00464095	0.00340523	0.00450417	0.00528419
CDIF630erm_00352		putative flagellar biosynthesis protein	0.00440252	0.00506449	0.001377	0.00472798	0.00484904	0.00341721	0.00246727	0.00299291	0.00373747	0.00284553	0.00345371	0.00209653	0.0051648	0.00330474	0.00631185
CDIF630erm_00353	flgK	flagellar hook-associated protein FlgK (or HAP1)	0.00411569	0.00387173	0.00358487	0.00238284	0.00306547	0.00367248	0.00267849	0.00302581	0.0032253	0.0103604	0.00783851	0.0112118	0.00613455	0.00619285	0.00557056
CDIF630erm_00354	flgL	flagellar hook-associated protein FlgL (or HAP3)	0.00235227	0.00167582	0.00186089	0.00383299	0.0019161	0.00141095	0.00155958	0.00266191	0.0026885	0.0323527	0.0316779	0.0226984	0.00442823	0.00495733	0.00358354
CDIF630erm_00355	fliW	flagellar assembly factor FliW	0.0149628	0.0119214	0.0108645	0.0144101	0.0122938	0.0112533	0.00924684	0.0119779	0.00991633	0.011354	0.0102801	0.0110134	0.0149048	0.0124162	0.0135239
CDIF630erm_00356	csrA	carbon storage regulator CsrA	0.0153288	0.0142471	0.0202114	0.0183511	0.0136273	0.0154171	0.0131481	0.0182374	0.0175236	0.0175371	0.0196062	0.024502	0.0229055	0.0194621	0.0226823
CDIF630erm_00357	fliS1	flagellar protein FliS	0.00787574	0.0068116	0.00559637	0.0101514	0.0111558	0.00644862	0.00792464	0.00575573	0.00782923	0.00845634	0.00500626	0.00843189	0.00966865	0.00733972	0.0186129
CDIF630erm_00358	fliS2	flagellar protein FliS	0.00504783	0.00513215	0.00608011	0.00192569	0.00506547	0.00362073	0.00364289	0.00598018	0.00712874	0.00321529	0.00667988	0.00473481	0.00612461	0.00470654	0.00712257
CDIF630erm_00359	fliD	flagellar hook-associated protein 2 FliD (or HAP2)	0.00968608	0.0116857	0.00878737	0.00739116	0.00712334	0.00486073	0.0103403	0.00752562	0.00670648	0.0372613	0.036702	0.0330242	0.0084513	0.00977864	0.0117993
CDIF630erm_00361	fliC	flagellin C	0.510275	0.454241	0.493025	0.377773	0.426184	0.549461	0.435039	0.413209	0.402318	0.518906	0.509085	0.467163	0.517346	0.684538	0.613596
CDIF630erm_00362		flagellin N-acetylglucosamine transferase	0.00254366	0.00578801	0.00695832	0.00416756	0.010887	0.00442317	0.00470976	0.00473058	0.0071952	0.00485858	0.0147089	0.00964192	0.00278536	0.00287213	0.00225441
CDIF630erm_00363		phosphothreonine phosphatase	0.018473	0.0210966	0.0168093	0.00934806	0.0139329	0.0199234	0.0138405	0.015954	0.0145573	0.0186187	0.0172345	0.0184927	0.027107	0.023108	0.0247206
CDIF630erm_00364		flagellin phosphothreonine transferase	0.0330289	0.0337805	0.0362708	0.0327557	0.0248445	0.0346696	0.029975	0.023872	0.0203848	0.0357393	0.0388743	0.0190034	0.0347254	0.0329346	0.0342685
CDIF630erm_00365		flagellin methyltransferase	0.0431604	0.0352731	0.0364788	0.0173082	0.0292721	0.0398827	0.0204215	0.02828	0.0230815	0.0293545	0.0301603	0.0211991	0.0639955	0.0557263	0.0604861
CDIF630erm_00366		flagellin phosphotransferase	0.0196141	0.0154889	0.0124419	0.0132904	0.0192302	0.0105849	0.0117268	0.0153973	0.0154215	0.0129306	0.0152874	0.0145013	0.0268646	0.0149942	0.0169584
CDIF630erm_00371	fliF	flagellar M-ring protein FliF	0.0121748	0.011397	0.0125322	0.00632338	0.008467	0.0127644	0.0102423	0.00787582	0.00995352	0.00864746	0.00658516	0.00979	0.0135747	0.012076	0.00892183
CDIF630erm_00372	fliG	flagellar motor switch protein FliG	0.0109459	0.00928281	0.00844488	0.0117114	0.0108552	0.00948238	0.0106225	0.0124253	0.0105661	0.00738766	0.00939717	0.0091823	0.0141857	0.0143472	0.012334
CDIF630erm_00378	flgE	flagellar hook protein FlgE (Distal rod protein)	0.0118025	0.0114089	0.00717581	0.0131293	0.0136348	0.0120157	0.010793	0.0094527	0.0111704	0.0121708	0.0138281	0.0111975	0.00983498	0.0105819	0.00983777
CDIF630erm_00379	flbD	flagellar protein FlbD	0.00790946	0.00787715	0.00842517	0.01286	0.00636818	0.00847428	0.00736058	0.00907562	0.00728891	0.00832868	0.0076477	0.00527332	0.0104497	0.00977337	0.0110446
CDIF630erm_00381	motB	flagellar motor rotation protein MotB (chemotaxis protein MotB)	0.000830231	0.00193154	0.00360711	0.00188273	0.00162906	0.00221343	0.00221931	0.00197602	0.00146847	0.00170232	0.00194516	0.0018092	0.00145913	0.00161617	0.00179359
CDIF630erm_00388	flhF	flagellar biosynthesis regulator FlhF (flagella-associated GTP-binding protein)	0.00230832	0.00354828	0.00299226	0.00223939	0.000735916	0.00226811	0.00172565	0.00198353	0.00202076	0.0102318	0.00155662	0.00229741	0.00248158	0.00167785	0.00168883
CDIF630erm_00394	fliM	flagellar motor switch protein FliM	0.00735764	0.00436245	0.00400545	0.00254765	0.00588062	0.00375989	0.00548078	0.00647332	0.00251993	0.00426452	0.00724109	0.00254191	0.00413587	0.00507719	0.00633443
CDIF630erm_00395	fliN2	flagellar motor switch protein FliN	0.00821654	0.00710411	0.0128061	0.00600657	0.00809088	0.00861788	0.00766794	0.0112263	0.00912141	0.010481	0.00768906	0.00990633	0.00946384	0.0119912	0.0067066
CDIF630erm_00396		tetratricopeptide repeat protein	0.00116599	0.0138135	0.00827243	0.0388496	0.0230875	0.00287011	0.006252	0.00115896	0.00156714	0.00255687	0.0109022	0.00168266	0.00688093	0.00172996	0.0098828
CDIF630erm_00397	htpG	heat shock protein HtpG	0.0506884	0.040521	0.055714	0.0350048	0.0496743	0.0463485	0.0492205	0.0465096	0.0456706	0.0433484	0.0490736	0.0483226	0.0516315	0.0436872	0.0415662
CDIF630erm_00398		putative iron-containing alcohol dehydrogenase	0.00348765	0.00301911	0.00334604	0.00122018	0.00583044	0.0025556	0.00351998	0.00279313	0.00231128	0.00217175	0.00305019	0.0027869	0.00391179	0.00272849	0.00299289
CDIF630erm_00403		pyridoxamine 5*-phosphate oxidase family protein	0.0039087	0.00372768	0.00217917	0.0066369	0.0100902	0.00628387	0.00389999	0.00503058	0.00380058	0.00668679	0.00581792	0.00614227	0.00271487	0.00245463	0.00290762
CDIF630erm_00420		putative iron-sulfur-binding protein	0.00757049	0.00670546	0.00689362	0.00846504	0.00644859	0.00751465	0.00775855	0.00660231	0.00888031	0.00604203	0.00566039	0.00583184	0.00548447	0.00451578	0.00464257
CDIF630erm_00456	pcrA	ATP-dependent DNA helicase PcrA	0.00733475	0.00465337	0.00645771	0.0061928	0.00920801	0.00465884	0.00712114	0.00261575	0.00414804	0.00493656	0.00112203	0.00676451	0.00964314	0.00377357	0.00517407
CDIF630erm_00457	apeB	aminipeptidase ApeB	0.00494932	0.00606618	0.00743588	0.00225263	0.00716186	0.005505	0.00689613	0.00919459	0.0124761	0.0059423	0.00362347	0.00742689	0.00914445	0.00727	0.0050776
CDIF630erm_00458		phospholipase, patatin family	0.00476224	0.00430165	0.00581455	0.00313169	0.00575165	0.00377692	0.00513025	0.00590651	0.00560378	0.00417797	0.00630284	0.00435735	0.00492833	0.00363536	0.00468753
CDIF630erm_00459	ppiB	peptidyl-prolyl cis-trans isomerase B	0.042291	0.0543503	0.0536659	0.0378092	0.054407	0.0481695	0.0516815	0.0478115	0.0520765	0.0612217	0.0567613	0.0468741	0.0468207	0.0375067	0.0521777
CDIF630erm_00461		cobalt-dependent inorganic pyrophosphatase	0.0645805	0.0509191	0.0474475	0.0552194	0.0573356	0.0384656	0.050407	0.057393	0.0482188	0.0411045	0.0391316	0.04363	0.0589178	0.046459	0.0425028
CDIF630erm_00462	adhE1	aldehyde-alcohol dehydrogenase	0.00275319	0.00161214	0.014623	0.00132245	0.00570795	0.00355611	0.00192188	0.00650842	0.00628237	0.00337612	0.00209498	0.00320235	0.00292193	0.00633771	0.00185102
CDIF630erm_00520		putative radical SAM-family protein	0.00216006	0.00129576	0.00186801	0.00141334	0.00147333	0.00155453	0.000602567	0.00155399	0.00119967	0.000889038	0.000977839	0.000549912	0.00285194	0.00281943	0.00135247
CDIF630erm_00522	ldhA	(R)-2-hydroxyisocaproate dehydrogenase	0.192002	0.236412	0.253987	0.155684	0.213078	0.283052	0.277504	0.312553	0.287032	0.256867	0.325167	0.209757	0.213216	0.273904	0.233159
CDIF630erm_00523	hadA	isocaprenoyl-CoA:2-hydroxyisocaproate CoA-transferase	0.205782	0.182078	0.207097	0.193063	0.225024	0.199511	0.234357	0.249794	0.219808	0.210093	0.189294	0.160556	0.2133	0.222487	0.261743
CDIF630erm_00524	hadI	activator of 2-hydroxyisocaproyl-CoA dehydratase	0.036257	0.0308722	0.0338626	0.0504996	0.0412854	0.0264787	0.0469627	0.044899	0.0436027	0.0332437	0.0406933	0.0280069	0.0508399	0.0452307	0.0405906
CDIF630erm_00525	hadB	2-hydroxyisocaproyl-CoA dehydratase, alpha subunit	0.155119	0.158463	0.143659	0.15782	0.182926	0.144992	0.166426	0.176632	0.151964	0.146401	0.133055	0.115549	0.164983	0.191484	0.147482
CDIF630erm_00526	hadC	2-hydroxyisocaproyl-CoA dehydratase, beta subunit	0.109281	0.103307	0.104718	0.127541	0.161565	0.116454	0.150025	0.143603	0.15317	0.0946233	0.0901758	0.127476	0.132348	0.139131	0.142036
CDIF630erm_00527	acdB	isocaproyl-CoA dehydrogenase, catalytic subunit	0.256167	0.249392	0.218455	0.208084	0.28786	0.256358	0.292065	0.261524	0.288131	0.236426	0.250231	0.244445	0.282461	0.268026	0.27659
CDIF630erm_00528	etfB1	isocaproyl-CoA dehydrogenase, electron transfer flavoprotein beta subunit	0.319803	0.301687	0.293936	0.296553	0.41276	0.342899	0.363374	0.36703	0.379093	0.314824	0.359767	0.303491	0.409167	0.394302	0.351463
CDIF630erm_00529	etfA1	isocaproyl-CoA dehydrogenase, electron transfer flavoprotein alpha subunit	0.255502	0.257437	0.281268	0.368585	0.252055	0.277406	0.294238	0.252815	0.254631	0.261621	0.291327	0.222996	0.259182	0.31305	0.347365
CDIF630erm_00531	fba	fructose-1,6-bisphosphate aldolase	0.112981	0.0925935	0.10578	0.0918638	0.121187	0.11834	0.110765	0.124347	0.104807	0.105201	0.1196	0.103706	0.0909455	0.0904509	0.114854
CDIF630erm_00532		putative tautomerase	0.00143849	0.00353914	0.00376392	0.00357325	0.00388159	0.00294758	0.00306583	0.00403996	0.00354852	0.00255765	0.00146115	0.00291219	0.00300757	0.00436564	0.0026615
CDIF630erm_00534		putative RNA methyltransferase	0.00246589	0.00218832	0.00231383	0.00217305	0.0020866	0.00217346	0.00155157	0.00105793	0.00327669	0.00176885	0.00276901	0.0020744	0.00282048	0.0015163	0.00244899
CDIF630erm_00550		putative conjugative transposon protein	0.00246031	0.00580362	0.00455737	0.00125942	0.00353374	0.0026883	0.00446984	0.00484659	0.00437378	0.00435125	0.00215083	0.00334404	0.00429163	0.00383795	0.00325805
CDIF630erm_00615		omega-amidase NIT2	0.00708855	0.00689293	0.00216957	0.0032291	0.00573157	0.00304411	0.00734215	0.0064078	0.00607635	0.00647634	0.0062233	0.00439898	0.00523074	0.00450552	0.00375096
CDIF630erm_00618	purC1	phosphoribosylaminoimidazole-succinocarboxamide synthetase	0.0119794	0.011279	0.00963767	0.0107089	0.00668936	0.00721823	0.00759218	0.00982549	0.00996122	0.00528226	0.00607498	0.00485737	0.00587071	0.00452622	0.00449779
CDIF630erm_00626	cwpV	putative hemagglutinin / adhesin cwpV	0.0382564	0.0328564	0.0260597	0.0104408	0.0344793	0.0287975	0.0311848	0.026913	0.0295127	0.0258729	0.0273387	0.0163614	0.036551	0.0306529	0.0260601
CDIF630erm_00631		hypothetical protein	0.0219461	0.0223577	0.0228716	0.0198636	0.0159545	0.0162953	0.0200303	0.0209749	0.0108442	0.0156378	0.0114473	0.0119324	0.0151942	0.0161197	0.0157697
CDIF630erm_00641		putative amidohydrolase	0.00272742	0.00122581	0.00112339	0.00643546	0.00489047	0.00385046	0.00328065	0.00308481	0.00311075	0.00332446	0.00581823	0.00312194	0.00490705	0.00116569	0.00334943
CDIF630erm_00657	arcB	Delta(1)-pyrroline-2-carboxylate reductase	0.00548955	0.00627589	0.00644624	0.00533154	0.00409386	0.00397712	0.00742032	0.00389506	0.00633005	0.00334297	0.00371107	0.00385339	0.00293104	0.00240518	0.00345485
CDIF630erm_00658		putative lipoprotein	0.00359073	0.00261953	0.0037189	0.00528056	0.0062192	0.00504493	0.00773596	0.00488596	0.00614702	0.00671495	0.00683195	0.00433397	0.00503745	0.00740975	0.00795594
CDIF630erm_00660		transcriptional regulator, beta-lactam repressor	0.000586088	0.00176985	0.00116231	0.00139301	0.00131198	0.00239419	0.00179218	0.00154002	0.00104443	0.00159226	0.00112097	0.000718993	0.00104649	0.000860889	0.00228356
CDIF630erm_00667	spsB1	signal peptidase IB	0.00169719	0.00273529	0.00206598	0.000776374	0.00182478	0.00157342	0.00156212	0.00359403	0.00217684	0.00121546	0.00104635	0.00161557	0.0020598	0.00109812	0.000829517
CDIF630erm_00672		transcriptional regulator, ArsR family	0.00456032	0.00264521	0.0033441	0.00467221	0.0050897	0.00270873	0.00478287	0.00449482	0.00375082	0.00310721	0.00288169	0.0039935	0.00756623	0.00394654	0.0042218
CDIF630erm_00674		putative aldo / keto reductase	0.0187117	0.00632463	0.00764383	0.0051062	0.00581387	0.00531849	0.00474356	0.00926809	0.00695814	0.0152303	0.00814487	0.00563274	0.00952504	0.00682325	0.00771948
CDIF630erm_00679	trmL	putative tRNA (cytidine(34)-2*-o)-methyltransferase	0.00160594	0.00116177	0.00206401	0.00238309	0.000931222	0.00183678	0.00148528	0.00191915	0.00253148	0.00209873	0.00141685	0.00178312	0.00208227	0.00187295	0.00292606
CDIF630erm_00680		uncharacterized protein, DegV family	0.00310434	0.00180288	0.00253544	0.0027935	0.0020667	0.00228474	0.00240998	0.00170453	0.00238435	0.00259051	0.00246648	0.00225508	0.00198714	0.00209182	0.00290012
CDIF630erm_00687	thrS	threonine--tRNA ligase	0.032496	0.033439	0.0310685	0.0565417	0.0366905	0.0267672	0.035864	0.0462977	0.0470188	0.0329498	0.0399442	0.0330486	0.0274454	0.0277096	0.0277672
CDIF630erm_00690		HD domain protein	0.0120261	0.00844266	0.00808706	0.00446545	0.00734599	0.00725685	0.0103146	0.00765264	0.0100462	0.00699341	0.00513957	0.00812449	0.0118822	0.00792434	0.00958938
CDIF630erm_00700		uncharacterized protein	0.00514429	0.00433061	0.00580441	0.00859776	0.00834415	0.00796148	0.00192607	0.00426037	0.00252726	0.00297332	0.00645395	0.00356105	0.00398901	0.00420448	0.00364232
CDIF630erm_00703		GTP binding domain protein	0.00564396	0.00786772	0.00564249	0.0119903	0.00658774	0.00761065	0.0105103	0.0130877	0.00630299	0.00988912	0.00736074	0.00271627	0.0103657	0.00360916	0.00913723
CDIF630erm_00785		transcriptional regulator, beta-lactam repressor	0.00149891	0.000552624	0.00107692	0.00131334	0.00107903	0.00253736	0.000524684	0.00110854	0.00168177	0.00153365	0.0011722	0.000921909	0.00152073	0.00106252	0.000975966
CDIF630erm_00787		uncharacterized protein, GTP cyclohydrolase-like	0.0632463	0.0494855	0.0538498	0.0647954	0.052331	0.0545992	0.0451634	0.0515695	0.0488041	0.0578176	0.0615029	0.0466881	0.0908659	0.07184	0.068297
CDIF630erm_00798	infC	translation initiation factor IF-3	0.0201292	0.0151942	0.0147935	0.0344813	0.0276825	0.0156848	0.0261788	0.0320435	0.0143009	0.0257839	0.0355072	0.0223062	0.0150716	0.0261286	0.0216253
CDIF630erm_00799	rpmI	50S ribosomal protein L35	0.0407173	0.0222697	0.023095	0.131738	0.0421037	0.0118488	0.0228025	0.0368423	0.018769	0.0265453	0.0382888	0.0178155	0.0268998	0.0223543	0.0169019
CDIF630erm_00800	rplT	50S ribosomal protein L20	0.0669444	0.0739501	0.0565557	0.124314	0.0534222	0.0504216	0.0620502	0.0697951	0.0592465	0.0581465	0.0654887	0.0623375	0.0743721	0.0546661	0.0566298
CDIF630erm_00814	pheS	phenylalanyl-tRNA synthetase alpha chain	0.0166039	0.0129617	0.0192029	0.0211556	0.0151542	0.0119906	0.0152644	0.0159341	0.0130956	0.0148071	0.0156912	0.0124369	0.0161244	0.0139606	0.0153029
CDIF630erm_00815	pheT	phenylalanyl-tRNA synthetase subunit beta	0.0288883	0.0296126	0.0195305	0.0272054	0.035679	0.019919	0.0301467	0.0279909	0.0351377	0.0272384	0.0266869	0.0309252	0.0207416	0.0228732	0.031475
CDIF630erm_00821		putative nitroreductase-like oxidoreductase	0.00337957	0.00427602	0.00527847	0.005372	0.00571317	0.00385736	0.0048474	0.00575259	0.00627981	0.00651682	0.0064818	0.0107268	0.00201922	0.00186644	0.00314073
CDIF630erm_00823	pepD	cytosol non-specific dipeptidase	0.0768757	0.0672464	0.0484743	0.069567	0.075122	0.0598759	0.0781382	0.0810204	0.0734683	0.069441	0.06593	0.0689211	0.0607212	0.0541808	0.0510952
CDIF630erm_00824	mutS2	endonuclease MutS2	0.00531348	0.00112528	0.00382606	0.00120696	0.00886658	0.00520468	0.00970284	0.00160578	0.0031304	0.00237381	0.00273398	0.00190953	0.0022126	0.00248326	0.00239796
CDIF630erm_00826	argS	arginine--tRNA ligase	0.011714	0.00931062	0.0114668	0.0097117	0.011824	0.00985287	0.00797226	0.0119562	0.0126319	0.00961785	0.0127862	0.0121912	0.0138642	0.012775	0.0109167
CDIF630erm_00830		tetratricopeptide repeat protein	0.00600736	0.00171322	0.00261188	0.0018373	0.00298588	0.00209377	0.00141383	0.00271108	0.00231198	0.00129508	0.00215347	0.00248173	0.0027447	0.00351167	0.00491649
CDIF630erm_00831	ptb2	phosphate butyryltransferase	0.00640507	0.0060409	0.00398428	0.0073894	0.00559078	0.00424842	0.00519248	0.00761523	0.00610062	0.00436535	0.00607585	0.00475753	0.00586184	0.00658024	0.00621322
CDIF630erm_00832	cooS	anaerobic carbon monoxide dehydrogenase	0.00556376	0.00950913	0.00544366	0.00388837	0.00825164	0.00488908	0.0108633	0.00689651	0.0116493	0.00150751	0.00424999	0.00109748	0.00712449	0.00799867	0.0065214
CDIF630erm_00833	cooC	carbon monoxide dehydrogenase, accessory protein	0.00504803	0.00195976	0.00242078	0.00118402	0.00135309	0.00112518	0.00262756	0.00288382	0.00267543	0.00122039	0.00104207	0.00081103	0.00326608	0.00187377	0.00252154
CDIF630erm_00834	fhs	formate--tetrahydrofolate ligase	0.0776673	0.0697417	0.08102	0.0583525	0.0677139	0.0809157	0.0951136	0.0802147	0.076504	0.0757559	0.0565776	0.0594381	0.0653955	0.0686945	0.0597925
CDIF630erm_00835	fchA	methenyltetrahydrofolate cyclohydrolase	0.00609976	0.00580762	0.00541406	0.00580634	0.0058139	0.00286525	0.00792272	0.00934841	0.00949181	0.00273276	0.00452957	0.00486833	0.00488482	0.00391406	0.00480328
CDIF630erm_00836	folD	bifunctional methylenetetrahydrofolate dehydrogenase (NADP+) / methenyl tetrahydrofolate cyclohydrolase	0.00989105	0.0103858	0.00912497	0.0125406	0.00542562	0.00923883	0.0116986	0.00961086	0.00923218	0.00663773	0.0086356	0.00333188	0.0222684	0.0117112	0.0110616
CDIF630erm_00840		acetyl-CoA synthase, nickel-inserting subunit	0.00334117	0.00462362	0.00352278	0.000342079	0.00196449	0.00255413	0.00277097	0.00400173	0.00356643	0.00234103	0.000971665	0.00203087	0.00351056	0.00417171	0.00304134
CDIF630erm_00841	acsD	corrinoid / iron-sulfur protein, small subunit	0.0114259	0.0100274	0.0169734	0.00881819	0.00815563	0.00518884	0.0111714	0.0155958	0.013761	0.00386558	0.00618239	0.00353257	0.00788656	0.00806931	0.00927685
CDIF630erm_00842	acsC	corrinoid / iron-sulfur protein, large subunit	0.00777425	0.00931612	0.00788346	0.00942071	0.00437987	0.00322998	0.0137999	0.0128596	0.0138424	0.00446502	0.003301	0.00381544	0.00503899	0.00373755	0.00423305
CDIF630erm_00843	acsE	5-methyltetrahydrofolate:corrinoid / iron-sulfur protein co-methyltransferase	0.0325578	0.0326087	0.0245072	0.0141654	0.0220767	0.0114792	0.0374149	0.0421836	0.0341375	0.0106063	0.0135592	0.0111014	0.0218724	0.0267421	0.0164845
CDIF630erm_00844	cdhC	acetyl-CoA synthase, subunit alpha / beta	0.00531922	0.00516753	0.00508395	0.0029157	0.00392586	0.00286202	0.00809314	0.00623902	0.00641947	0.00225652	0.00447135	0.00286296	0.00465165	0.00559156	0.00438138
CDIF630erm_00850		putative RNA-binding protein	0.0293067	0.0254389	0.0263536	0.0212416	0.0210213	0.0216639	0.0199558	0.0278902	0.0229696	0.0150503	0.0222889	0.0148839	0.0290636	0.0221848	0.0208471
CDIF630erm_00852		uncharacterized protein	0.00980868	0.0236557	0.0142426	0.0181861	0.01065	0.0126812	0.0269955	0.00964359	0.0198245	0.0153539	0.0168946	0.014371	0.0155821	0.0176595	0.00907152
CDIF630erm_00872	thiI	sulfurtransferase ThiI	0.00287285	0.00558482	0.00368092	0.00512261	0.00454399	0.00373578	0.00434714	0.00409665	0.0027637	0.00296366	0.00314139	0.00417288	0.00305147	0.00315504	0.00508422
CDIF630erm_00876	pflA	formate C-acetyltransferase activating enzyme	0.0070179	0.00562838	0.007145	0.00622958	0.00857753	0.0101337	0.00605486	0.00622554	0.00663543	0.00966597	0.0112702	0.0106545	0.00584651	0.00441699	0.00925419
CDIF630erm_00877	plfB	formate C-acetyltransferase	0.21381	0.200167	0.197593	0.22634	0.217569	0.247753	0.18205	0.196085	0.184156	0.240399	0.240051	0.280978	0.209887	0.205358	0.158224
CDIF630erm_00879	cshA1	DEAD-box ATP-dependent RNA helicase CshA	0.00626135	0.00625396	0.00727693	0.0101887	0.0065812	0.0118774	0.00894308	0.00898627	0.00791049	0.0118582	0.00792868	0.00707984	0.00559026	0.00620099	0.00713983
CDIF630erm_00889	spoIIAB	anti-sigma F factor (stage II sporulation protein AB)	0.000813203	0.00225112	0.00145815	0.00164941	0.00154026	0.00183467	0.00145933	0.000961043	0.00135985	0.00177826	0.0016898	0.00216544	0.00277626	0.00153201	0.00217515
CDIF630erm_00897		putative amidohydrolase, M20D peptidase family	0.00768524	0.00566963	0.00349772	0.000953041	0.00714799	0.0080027	0.00532603	0.00779746	0.00988034	0.00778147	0.00483973	0.00679129	0.00762651	0.00590604	0.00568428
CDIF630erm_00898		hypothetical protein	0.00264453	0.0015955	0.002112	0.00362679	0.00248627	0.00143756	0.00241935	0.00389932	0.00228179	0.00202771	0.00270823	0.00107976	0.0026692	0.00192225	0.00123847
CDIF630erm_00899		putative penicillin-binding protein	0.00321811	0.00276311	0.00430916	0.0074322	0.00346792	0.00499472	0.0073943	0.00495751	0.00732625	0.00739616	0.00491578	0.00542659	0.00526757	0.00340744	0.0139182
CDIF630erm_00904		ABC-type transport system, ATP-binding protein	0.00946752	0.0104979	0.00949045	0.00863762	0.00540483	0.0115133	0.00508162	0.00747427	0.00678147	0.00587582	0.00582766	0.0073866	0.00929027	0.00951683	0.00921731
CDIF630erm_00907		putative GTP-binding protein, HflX type	0.00659271	0.00407756	0.00386182	0.00173076	0.0102281	0.00287194	0.00427418	0.0106387	0.00542128	0.004583	0.00235788	0.00450202	0.00641443	0.00384229	0.00438641
CDIF630erm_00909		putative hydrolase, NUDIX family	0.0288095	0.0296562	0.0291322	0.0343845	0.02488	0.0251092	0.0299815	0.0260945	0.0334323	0.028843	0.0238225	0.0242468	0.0284652	0.0263248	0.0281764
CDIF630erm_00913	nadE	NAD+ synthase	0.015546	0.0153052	0.016865	0.0252374	0.0148938	0.0148135	0.0147878	0.0168403	0.0179581	0.00888896	0.0249037	0.0135327	0.0163113	0.0147285	0.0139083
CDIF630erm_00914		transcriptional regulatory protein	0.0346594	0.0353889	0.037189	0.0295225	0.028483	0.0337265	0.0370623	0.0340356	0.0335464	0.0229651	0.0262908	0.0280434	0.0395271	0.0392839	0.0476367
CDIF630erm_00923	etfB2	acryloyl-CoA dehydrogenase, electron transfer flavoprotein beta subunit	0.00416236	0.00929692	0.00134026	0.00266556	0.0042241	0.00270551	0.0054324	0.00511518	0.000580585	0.00491042	0.0152879	0.00109	0.00164273	0.00327897	0.00202158
CDIF630erm_00924	etfA2	acryloyl-CoA dehydrogenase, electron transfer flavoprotein alpha subunit	0.00348439	0.00220639	0.00945605	0.0335862	0.00952988	0.0016632	0.00364223	0.00585473	0.00176166	0.00157141	0.00240109	0.00372966	0.00725874	0.00383928	0.00816953
CDIF630erm_00926		uncharacterized protein	0.0303656	0.0310476	0.0330946	0.0338652	0.0269779	0.0270819	0.0373222	0.0393581	0.0364325	0.0366917	0.0386812	0.0329845	0.0311133	0.0323512	0.0401696
CDIF630erm_00928	floX	putative flavodoxin	0.0137591	0.0173816	0.0122246	0.00684022	0.0109985	0.00634537	0.011354	0.0155537	0.0121922	0.00527915	0.011672	0.00990545	0.00721298	0.0108353	0.0113492
CDIF630erm_00930		putative universal stress protein A (UspA)	0.0686566	0.0478902	0.0349489	0.0184952	0.051098	0.0340852	0.0393676	0.0382798	0.0388889	0.0302913	0.0275577	0.0323081	0.0297318	0.0251025	0.0234548
CDIF630erm_00936	bglC	6-phospho-beta-glucosidase	0.00188599	0.00287582	0.0028553	0.00232318	0.00152803	0.00212065	0.00290557	0.00196928	0.00472771	0.00249384	0.00199631	0.00168258	0.00241576	0.00212022	0.00317358
CDIF630erm_00944	rbr1	putative rubrerythrin	0.519946	0.574414	0.465311	0.297048	0.548962	0.688254	0.57607	0.506425	0.430293	0.61544	0.376997	0.494903	0.506494	0.552379	0.645372
CDIF630erm_00945	perR	peroxide-responsive repressor	0.0933748	0.0728139	0.0787217	0.0411717	0.0664477	0.0823651	0.0704307	0.0832701	0.0580093	0.0911181	0.0883098	0.0788126	0.147408	0.133144	0.111213
CDIF630erm_00946	dsr	desulfoferrodoxin	0.160236	0.286361	0.243744	0.483559	0.453596	0.35531	0.434278	0.305657	0.315474	0.35179	0.175692	0.311523	0.229539	0.332018	0.360871
CDIF630erm_00947		oxidative stress glutamate dehydrogenase (glutamate synthase-like) (rubredoxin)	0.26324	0.396742	0.303138	0.323486	0.344674	0.322186	0.387898	0.320787	0.335161	0.338949	0.291643	0.313933	0.27938	0.264634	0.273145
CDIF630erm_00948		putative metallo-beta-lactamase superfamily protein	0.00454283	0.00576061	0.0023651	0.00516693	0.00468678	0.0030748	0.00562338	0.00468871	0.00624042	0.00357958	0.00624566	0.00605809	0.00297586	0.00218666	0.00412347
CDIF630erm_00951		citrate (Re)-synthase	0.0255503	0.0293718	0.0295929	0.0644715	0.062309	0.0532253	0.0437277	0.048727	0.0451	0.0449004	0.0464539	0.0433128	0.00520553	0.00545793	0.00433447
CDIF630erm_00952	acnB	aconitate hydratase	0.0202256	0.0228384	0.0174609	0.0336792	0.0480634	0.0351937	0.0446077	0.0368163	0.0482599	0.0455031	0.0330364	0.0362284	0.00603894	0.00557891	0.0045303
CDIF630erm_00953	icd	isocitrate dehydrogenase (NAD+)	0.0131716	0.0155635	0.0132705	0.0394768	0.0313247	0.0263694	0.0325927	0.0277474	0.0284594	0.023051	0.0206654	0.022547	0.00430201	0.0042917	0.004114
CDIF630erm_00955		putative acetyltransferase	0.00299413	0.00335478	0.00471995	0.00370182	0.00370458	0.0033706	0.00278247	0.0030739	0.00394183	0.00338812	0.00341014	0.00309351	0.00458597	0.00456003	0.00542624
CDIF630erm_00959		putative isomerase / hydrolase	0.00858754	0.00712449	0.0110671	0.00736128	0.00721865	0.0103873	0.0065696	0.0159388	0.01111	0.0141455	0.00679837	0.00694324	0.00430772	0.00800595	0.00507443
CDIF630erm_00960	purH*	phosphoribosylaminoimidazolecarboxamide formyltransferase	0.016485	0.00956862	0.01423	0.0474929	0.0366105	0.0223936	0.0214685	0.017535	0.0177131	0.0227853	0.0248601	0.0282215	0.0152926	0.0109266	0.00914916
CDIF630erm_00963	cwp25	putative cell wall-binding protein cwp25	0.00970825	0.00658484	0.00955576	0.0123386	0.0117275	0.010001	0.00738132	0.0116102	0.00977115	0.00739134	0.0113571	0.00720306	0.0101401	0.00980479	0.0112445
CDIF630erm_00968		putative AbgB-like amidohydrolase	0.00194209	0.00185836	0.00248887	0.00901407	0.00236679	0.00168234	0.00129945	0.00214783	0.00244982	0.00247861	0.00323232	0.00175555	0.00354265	0.00272474	0.00333676
CDIF630erm_00974	oppA	ABC-type transport system, oligopeptide-family extracellular solute-binding protein	0.027748	0.035929	0.0299053	0.0261403	0.0284306	0.0131402	0.0471661	0.0512432	0.0500833	0.0142359	0.0185087	0.0305692	0.0261665	0.0246088	0.0231803
CDIF630erm_00985		putative ADP-ribose binding protein	0.00658723	0.00657358	0.00604538	0.00492198	0.00347288	0.00401324	0.00477136	0.00438237	0.00399691	0.00101185	0.00116035	0.00125209	0.00332156	0.00401127	0.00411124
CDIF630erm_00993		ABC-type transport system, sugar-family extracellular solute-binding protein	0.0527733	0.0467811	0.0466437	0.0673313	0.134607	0.0992755	0.107794	0.108186	0.111385	0.0745696	0.116828	0.100299	0.0540014	0.0496228	0.0595013
CDIF630erm_00994		ABC-type transport system, sugar-family ATP-binding protein	0.00341931	0.00585561	0.0037477	0.00645165	0.00848754	0.00645392	0.00976623	0.00721802	0.0103027	0.0064951	0.00713676	0.00511448	0.00967767	0.00913241	0.00854492
CDIF630erm_00997		ABC-type transport system, sugar-family ATP-binding protein	0.00232648	0.000861812	0.00112453	0.00122404	0.000686085	0.000365097	0.00100128	0.000909669	0.0015005	0.000580308	0.000945723	0.0033208	0.000418713	0.000253702	0.00203617
CDIF630erm_01001		putative protein modulating protease activity	0.0421391	0.0431812	0.0460181	0.0355333	0.0186863	0.0397495	0.0111473	0.0144604	0.0149507	0.0187861	0.0222536	0.0213787	0.00558401	0.00599893	0.00783758
CDIF630erm_01004	glgA	glycogen synthase	0.00312475	0.00224836	0.00268313	0.00342823	0.00185536	0.00167106	0.000652038	0.00527812	0.00096346	0.00103776	0.00282256	0.0017568	0.00203242	0.000403494	0.00219666
CDIF630erm_01007		transcriptional regulator, GntR family	0.00255621	0.00198989	0.00215498	0.00388187	0.0034179	0.00204988	0.00130008	0.00813548	0.00407379	0.00230543	0.00182951	0.00332042	0.00233001	0.00182366	0.00348026
CDIF630erm_01010	speE	spermidine synthase	0.00512391	0.00512771	0.00791708	0.0016709	0.0029935	0.00334962	0.00515291	0.00261211	0.00607745	0.00429563	0.00319563	0.00386663	0.00832416	0.00870741	0.00932912
CDIF630erm_01012	cspA	cold shock protein	0.138153	0.0774753	0.113212	0.0797033	0.134758	0.0669044	0.0622461	0.0777182	0.0457438	0.0825741	0.0570108	0.0318569	0.148803	0.108526	0.0682694
CDIF630erm_01013		ferredoxin hydrogenase	0.016931	0.0155782	0.018024	0.0130377	0.0129747	0.0115518	0.0164488	0.0121896	0.0446576	0.0133388	0.0114426	0.0131093	0.018857	0.0170683	0.0170904
CDIF630erm_01014		ferredoxin hydrogenase	0.00868902	0.00793927	0.00647865	0.00706639	0.00789854	0.00663468	0.00656227	0.00623621	0.00643778	0.00399408	0.00644003	0.00474271	0.00605957	0.00621178	0.00965602
CDIF630erm_01018		hypothetical protein	0.00626253	0.00803167	0.027858	0.0106129	0.00644506	0.00558716	0.00963639	0.00828352	0.019531	0.00661687	0.00702093	0.0178163	0.00656144	0.00454994	0.00523563
CDIF630erm_01020	opuCA	ABC-type transport system, glycine betaine / carnitine / choline ATP-binding protein	0.0288693	0.0330095	0.0207146	0.0120805	0.0209005	0.0140979	0.0200896	0.0191131	0.0261163	0.00856536	0.00973177	0.0159427	0.00861128	0.00794593	0.0071961
CDIF630erm_01021	opuCC	ABC-type transport system, glycine betaine / carnitine / choline permease	0.0203265	0.0181465	0.016316	0.0140395	0.016611	0.0118993	0.0109301	0.0181767	0.0142645	0.0102259	0.00971748	0.011425	0.0061565	0.00462762	0.00592462
CDIF630erm_01026		putative phage protein	0.00157189	0.00239156	0.00148369	0.0160988	0.00310332	0.00311819	0.0028871	0.00373541	0.003394	0.00179255	0.00375874	0.00654308	0.00396587	0.00260353	0.000410962
CDIF630erm_01029		transcriptional regulator, phage-type	0.00176341	0.00125034	0.0011486	0.00104811	0.00178984	0.000518806	0.0018152	0.0015272	0.00123333	0.00134299	0.00103693	0.00209435	0.00167744	0.00139994	0.0014813
CDIF630erm_01066		putative phage protein	0.00170028	0.000966326	0.00155716	0.00222236	0.00239411	0.0015002	0.00111601	0.00154999	0.00129449	0.00116828	0.00143814	0.00132639	0.0018124	0.00169415	0.00202783
CDIF630erm_01069		putative phage protein	0.0285612	0.0329821	0.0254241	0.0173991	0.0417033	0.0326286	0.0334348	0.0312951	0.043523	0.0256622	0.0243157	0.0262646	0.0399873	0.0306941	0.0388682
CDIF630erm_01090		putative phage protein	0.00354566	0.00445624	0.00516225	0.00349605	0.00300354	0.00239024	0.00389777	0.00496115	0.0034025	0.00210733	0.00349123	0.00347884	0.00517346	0.00513486	0.00722992
CDIF630erm_01109		protein-export protein, SecB-like	0.0204296	0.0129642	0.0147436	0.0120322	0.0111933	0.0109696	0.0126887	0.0172418	0.0174376	0.011603	0.00977808	0.0132561	0.017382	0.0151056	0.010399
CDIF630erm_01121	rpsA	30S ribosomal protein S1	0.0481748	0.0420032	0.0466121	0.029207	0.0375058	0.0355833	0.0352213	0.0423372	0.0434848	0.0327382	0.0447634	0.0393693	0.0560082	0.046903	0.0435894
CDIF630erm_01130		putative serine-pyruvate aminotransferase	0.00623164	0.00767364	0.00694296	0.024176	0.00576273	0.00880753	0.00810525	0.00934151	0.008704	0.00942923	0.00948641	0.0132179	0.0116854	0.011337	0.00858383
CDIF630erm_01132		uncharacterized protein, UCP033563-like	0.00112201	0.00283786	0.0024568	0.00160073	0.00363055	0.00181952	0.00123137	0.00448749	0.00468519	0.001521	0.00239232	0.000994846	0.00232037	0.000801435	0.0018099
CDIF630erm_01135		ABC-type transport system, nitrate / sulfonate / taurine extracellular solute-binding protein	0.00479167	0.00169927	0.00179531	0.00325241	0.00218425	0.00440207	0.0015635	0.00298313	0.00236121	0.00352677	0.00302633	0.00103841	0.00296215	0.00180616	0.0055586
CDIF630erm_01141	ytsJ	malate dehydrogenase (oxaloacetate-decarboxylating)	0.00358738	0.00411572	0.00120189	0.0241976	0.00707507	0.00128455	0.00492695	0.0058803	0.00345329	0.00383699	0.00807757	0.00258493	0.00752701	0.00275336	0.00127079
CDIF630erm_01143		putative zinc binding DNA-binding protein	0.00173707	0.00195988	0.00183005	0.00343597	0.00138418	0.00251276	0.00167342	0.00135685	0.00193778	0.00282244	0.00244541	0.00159014	0.00136716	0.00116455	0.00216051
CDIF630erm_01160	potA	ABC-type transport system, spermidine / putrescine ATP-binding protein	0.00240464	0.00142761	0.00264802	0.00332005	0.00327997	0.00144062	0.00207938	0.00303912	0.00166304	0.00260773	0.0043374	0.00195451	0.00253263	0.0028331	0.00259934
CDIF630erm_01163	potD	ABC-type transport system, spermidine / putrescine solute-binding protein	0.0057852	0.00482409	0.00574306	0.00776839	0.00685622	0.00201218	0.00434692	0.00373416	0.00439383	0.00488124	0.0092516	0.00635142	0.00824871	0.00363588	0.0068327
CDIF630erm_01175	cwp16	putative cell wall hydrolase / autolysin	0.00817278	0.0105015	0.00796375	0.0106812	0.00741442	0.00845787	0.00839366	0.00714065	0.00929204	0.0103358	0.0101588	0.00817035	0.0100462	0.0072774	0.00978843
CDIF630erm_01176	cwp17	putative cell wall hydrolase / autolysin	0.00182858	0.00232838	0.002685	0.000911627	0.00287302	0.0017552	0.00147913	0.00139248	0.003298	0.00328817	0.0014404	0.00111523	0.00341216	0.00157542	0.00273846
CDIF630erm_01186	pepT1	peptidase T	0.00606936	0.0042962	0.00540342	0.00530512	0.00658144	0.00715164	0.00789675	0.00515944	0.00675841	0.0081665	0.00531469	0.00553701	0.00555276	0.00394757	0.00576913
CDIF630erm_01187	cwp18	putative cell wall-binding protein cwp18	0.0102735	0.00805487	0.00941885	0.0109361	0.00772313	0.0083085	0.00768603	0.00724509	0.0242928	0.00986629	0.01027	0.0100146	0.00957714	0.0114421	0.0102476
CDIF630erm_01188		putative phosphodiesterase	0.00524747	0.00217782	0.00252182	0.00743301	0.00490777	0.00539014	0.00351101	0.00367161	0.00688727	0.00338768	0.00282032	0.00445857	0.00281366	0.00274849	0.00409894
CDIF630erm_01194	bcd	butyryl-CoA dehydrogenase, catalytic subunit	0.086356	0.098193	0.0907263	0.0567726	0.0836735	0.0659883	0.10902	0.108784	0.0992679	0.0643481	0.043465	0.0650789	0.0521649	0.0574043	0.0556421
CDIF630erm_01195	etfB3	butyryl-CoA dehydrogenase, electron transfer flavoprotein beta subunit	0.0914539	0.0998383	0.102631	0.123454	0.0998299	0.0729343	0.133153	0.153278	0.143549	0.0712386	0.0793801	0.0724884	0.0538977	0.0653184	0.067561
CDIF630erm_01196	etfA3	butyryl-CoA dehydrogenase, electron transfer flavoprotein alpha subunit	0.0693261	0.0721661	0.0748282	0.0661986	0.0526245	0.0537255	0.0717016	0.0838465	0.0683352	0.0497005	0.0564846	0.0371563	0.0468948	0.0427915	0.0414302
CDIF630erm_01197	crt2	short-chain-enoyl-CoA hydratase	0.023271	0.0163834	0.0131301	0.015049	0.0114063	0.00822696	0.0187145	0.0247441	0.0187024	0.00819152	0.012863	0.00796088	0.0138767	0.00896211	0.0107894
CDIF630erm_01198	hbd	3-hydroxybutyryl-CoA dehydrogenase	0.0819162	0.10077	0.0903342	0.0735132	0.0910439	0.0910002	0.111608	0.0865552	0.0853081	0.0697315	0.0823214	0.0628375	0.0477005	0.0557604	0.0438895
CDIF630erm_01199	thlA1	acetyl-CoA C-acetyltransferase	0.164381	0.121514	0.144197	0.148238	0.161115	0.134801	0.172729	0.182283	0.178374	0.108137	0.125812	0.129615	0.0786432	0.0923757	0.0876855
CDIF630erm_01201		nucleoid-associated protein, NdpA-like	0.00326853	0.00439889	0.00312807	0.00233833	0.00320604	0.00204883	0.00260611	0.00367696	0.00812896	0.00216291	0.00199505	0.00265691	0.00319558	0.00286314	0.00210085
CDIF630erm_01207	ccpA	transcriptional regulator, LacI family	0.0166046	0.017154	0.0144935	0.01452	0.0112268	0.0145028	0.0144883	0.00861466	0.0141552	0.018489	0.0178131	0.0202686	0.0197167	0.0166771	0.018279
CDIF630erm_01215		uncharacterized protein, UPF0291 protein family	0.00532917	0.0040898	0.00585203	0.00133584	0.00339995	0.00294864	0.0022118	0.00244177	0.00353261	0.00328858	0.0034476	0.00212466	0.00507968	0.00841105	0.00494131
CDIF630erm_01216	apeA	aminopeptidase ApeA	0.0163209	0.0152045	0.0163073	0.0104921	0.0143965	0.0119258	0.0138178	0.0128417	0.0173156	0.012862	0.0156098	0.0120945	0.0193721	0.0171885	0.0144749
CDIF630erm_01224		putative lipoprotein	0.0020811	0.00326591	0.00223463	0.00184396	0.00112605	0.00270353	0.00191031	0.00170878	0.00284035	0.00242309	0.00299067	0.00166185	0.00277407	0.00273327	0.00252588
CDIF630erm_01227		PTS system, galactiol-type IIB component	0.0139268	0.00680397	0.011429	0.0037003	0.00937636	0.00811786	0.00834048	0.00769991	0.00913558	0.00735135	0.00891984	0.00599338	0.0140326	0.0107532	0.012334
CDIF630erm_01230		putative peptidase, M20D family	0.0198001	0.0155098	0.0228383	0.0227061	0.0189473	0.0137601	0.0130923	0.0163341	0.0265389	0.0258259	0.0271845	0.0273964	0.0242308	0.0283531	0.0176748
CDIF630erm_01270		putative nitroreductase-like oxidoreductase	0.00698806	0.0131639	0.0130799	0.0151476	0.00597196	0.00917004	0.0120348	0.0106881	0.00625995	0.0177364	0.0114733	0.00824097	0.00835473	0.0086714	0.00864403
CDIF630erm_01275	polA	DNA polymerase I (POLI)	0.00390623	0.00306782	0.00163714	0.00297144	0.00235159	0.00184634	0.00172548	0.00164881	0.00235294	0.00294737	0.00256656	0.00255827	0.00165861	0.00127611	0.00321404
CDIF630erm_01278		putative solute-binding lipoprotein	0.00246421	0.00361034	0.00477197	0.00340415	0.00298235	0.00243046	0.00343155	0.00369067	0.00308658	0.00199194	0.00268245	0.00273047	0.00331571	0.00345815	0.00383629
CDIF630erm_01281	gloA	lactoylglutathione lyase	0.0178436	0.0160289	0.023817	0.00556268	0.0221588	0.0240956	0.0210962	0.0215802	0.0189274	0.0292435	0.0101518	0.0192331	0.0285618	0.0302061	0.0128432
CDIF630erm_01282		putative SH3-domain protein	0.0199357	0.0196778	0.0175796	0.0392673	0.0194974	0.0226791	0.0204088	0.0176561	0.0206921	0.0221769	0.0213432	0.0193754	0.0260268	0.0309113	0.0311931
CDIF630erm_01284	rnfC	electron transport complex protein	0.0186995	0.0194141	0.0187216	0.0203322	0.0448472	0.0238904	0.02243	0.0333989	0.0297147	0.0195706	0.0238376	0.0303703	0.0197666	0.0188876	0.0198692
CDIF630erm_01285	rnfD	electron transport complex protein	0.00341263	0.00460714	0.00369673	0.0100578	0.00659996	0.00495587	0.00532845	0.00305943	0.00348463	0.00534561	0.00368259	0.00553913	0.00353803	0.00285314	0.00575152
CDIF630erm_01286	rnfG	electron transport complex protein	0.00743933	0.00824599	0.00752703	0.0188706	0.0121099	0.00536597	0.00578956	0.00876768	0.00585291	0.00378426	0.0110377	0.00574761	0.00695457	0.00614348	0.00728871
CDIF630erm_01289	rnfB	electron transport complex protein	0.00823386	0.0129683	0.00894137	0.0176055	0.00948326	0.0083428	0.0119698	0.00860554	0.0107143	0.00545586	0.00972293	0.010831	0.00736902	0.00668174	0.00477341
CDIF630erm_01292	mreB2	rod shape-determining protein MreB	0.0796162	0.060473	0.0696766	0.0405153	0.068619	0.0795952	0.0661179	0.0591264	0.0621668	0.0592001	0.0692757	0.0602517	0.0692703	0.0777685	0.0786414
CDIF630erm_01293	mreC	rod shape-determining protein MreC	0.00217297	0.00249452	0.00391404	0.0106244	0.00261272	0.00205043	0.0020245	0.00395608	0.00193566	0.00282046	0.0116286	0.00317266	0.00371571	0.0031158	0.00352046
CDIF630erm_01295		putative penicillin-binding protein with a N-terminal TonB-box	0.0101382	0.00647615	0.0113848	0.00279478	0.0092898	0.00407587	0.00668427	0.00769997	0.00487762	0.00888628	0.00370132	0.00673535	0.0036493	0.00422224	0.00790999
CDIF630erm_01297	minD	septum site-determining protein MinD (cell division inhibitor MinD)	0.00792588	0.00871583	0.0046947	0.00845818	0.0130373	0.00831075	0.00898774	0.00971079	0.0160467	0.00805888	0.0134829	0.0133336	0.0151966	0.0110701	0.0118679
CDIF630erm_01300	mgsA	methylglyoxal synthase	0.00524538	0.00616003	0.00449231	0.00124555	0.00298055	0.00561997	0.00484282	0.0030657	0.00279873	0.00441714	0.0030339	0.00285686	0.0069103	0.00487884	0.00696504
CDIF630erm_01303		uncharacterized protein, transglutaminase-like	0.00997312	0.00632592	0.00639256	0.00683838	0.00609585	0.0058215	0.0065191	0.00572382	0.0070017	0.0109145	0.010321	0.0125464	0.0151447	0.0187493	0.0123389
CDIF630erm_01304	fprA	flavo-diiron protein FprA	0.0360059	0.0278134	0.0272912	0.0434979	0.0331737	0.0246214	0.0288747	0.0324203	0.030669	0.0256558	0.0196483	0.0336879	0.0317917	0.0280183	0.019243
CDIF630erm_01305		putative radical SAM-superfamily protein	0.00763369	0.00795694	0.00910768	0.00568434	0.00658035	0.00645153	0.00527413	0.00835906	0.00947837	0.00645199	0.00530361	0.00645413	0.00896143	0.00892419	0.00779709
CDIF630erm_01306		radical SAM-linked protein	0.00310474	0.00328711	0.00149669	0.00354551	0.00311619	0.00249216	0.00230892	0.00494939	0.00293725	0.00451675	0.00736569	0.00323841	0.00281198	0.00224742	0.00301588
CDIF630erm_01308	rplU	50S ribosomal protein L21	0.118699	0.110248	0.113925	0.105288	0.0856293	0.121354	0.0956577	0.0714104	0.0827702	0.0758455	0.15082	0.0707731	0.164815	0.153828	0.17794
CDIF630erm_01310	rpmA	50S ribosomal protein L27	0.0851359	0.0536344	0.0450922	0.0404105	0.0554197	0.0727323	0.038545	0.0437528	0.0309828	0.0197904	0.0477591	0.0565741	0.0711833	0.0672089	0.0602824
CDIF630erm_01311	obgE	Spo0B-associated GTP-binding protein	0.00267621	0.00379804	0.00230032	0.00357679	0.00261502	0.00360212	0.00310343	0.00220365	0.00248617	0.00348309	0.00390437	0.00351287	0.00345083	0.00410701	0.00388936
CDIF630erm_01312		rna-binding protein, yhby family	0.011942	0.0116572	0.0132731	0.00207324	0.00942953	0.00922772	0.0082475	0.0106769	0.01189	0.0214803	0.00928373	0.0113888	0.0107603	0.0126442	0.0118681
CDIF630erm_01323	ackA	acetate kinase	0.138214	0.118876	0.116309	0.0972412	0.110768	0.103323	0.100358	0.12322	0.107644	0.0869831	0.119274	0.0905273	0.125988	0.101834	0.0892347
CDIF630erm_01325	rpmF	50S ribosomal protein L32	0.108624	0.0846488	0.0947919	0.140456	0.0671903	0.150034	0.0916449	0.0766375	0.0756716	0.102827	0.140986	0.0477976	0.0977477	0.141722	0.169302
CDIF630erm_01327	plsX	phosphate acyltransferase	0.00563377	0.00504401	0.00479385	0.00465186	0.00673148	0.00365164	0.0046905	0.00542525	0.00580709	0.00527361	0.00636258	0.00464908	0.00393585	0.0046029	0.00421659
CDIF630erm_01328	fabH	beta-ketoacyl-[acyl-carrier-protein] synthase 3	0.0199331	0.0170006	0.0229665	0.00962398	0.0132729	0.0156956	0.0142427	0.0142596	0.0161844	0.0134667	0.0184519	0.0130082	0.0184264	0.0176439	0.0161117
CDIF630erm_01329	fabK	enoyl-[acyl-carrier-protein] reductase (NADH)	0.0397967	0.0486731	0.0410012	0.0404174	0.0402268	0.0383961	0.0397794	0.0409741	0.0358905	0.0419815	0.0430485	0.0375999	0.0411908	0.0387857	0.0397335
CDIF630erm_01330	fabD	malonyl CoA-acyl carrier protein transacylase	0.019996	0.0168084	0.0174988	0.0116577	0.0268811	0.0111005	0.0155336	0.019136	0.0191802	0.0158596	0.0175664	0.0121529	0.0175585	0.0160579	0.0159244
CDIF630erm_01331	fabG1	3-oxoacyl-[acyl-carrier-protein] reductase	0.0165126	0.0160435	0.0172189	0.0123971	0.0214842	0.014025	0.0112012	0.0186266	0.0194867	0.0135448	0.0210952	0.0200958	0.0186522	0.0167186	0.0189491
CDIF630erm_01333	fabF	3-oxoacyl-[acyl-carrier-protein] synthase 2	0.0308291	0.0301518	0.0302861	0.0128647	0.03	0.0259694	0.0290669	0.0244387	0.0294434	0.0266513	0.0257708	0.0204336	0.0309518	0.0279337	0.0302217
CDIF630erm_01339		putative N-acetyltransferase	0.0125882	0.00744256	0.00901153	0.00296337	0.00991272	0.0115551	0.0086015	0.00759625	0.00982958	0.00836426	0.00561569	0.00881338	0.0127733	0.0108776	0.0101212
CDIF630erm_01349		alkaline shock protein	0.0346541	0.00995806	0.029261	0.0559917	0.0152997	0.0245366	0.0162105	0.0163504	0.0166687	0.0195973	0.033788	0.0188064	0.0265733	0.0245725	0.0204593
CDIF630erm_01350	nusB	N utilization substance protein B	0.00625296	0.0084169	0.00634844	0.00226679	0.00619219	0.00446105	0.00538548	0.00852399	0.006347	0.00980207	0.0043895	0.00535752	0.00834792	0.00867031	0.0072841
CDIF630erm_01354	ispA	geranylgeranyl pyrophosphate synthase	0.0072013	0.0058188	0.00693082	0.00272934	0.00590755	0.00309464	0.00537669	0.00494918	0.00835448	0.00342173	0.0023304	0.00586115	0.0043686	0.00411219	0.00414215
CDIF630erm_01363	spo0A	stage 0 sporulation protein A	0.0179594	0.0132953	0.0124538	0.00853445	0.012613	0.0129874	0.0164026	0.0131921	0.0121276	0.00703348	0.0105226	0.00738772	0.0178266	0.0125823	0.0113961
CDIF630erm_01365		hypothetical protein	0.00609577	0.00557058	0.00632149	0.00437884	0.00551019	0.00621991	0.00592359	0.00698655	0.00749247	0.00467778	0.00305292	0.00443537	0.00767852	0.00686333	0.0060763
CDIF630erm_01366		putative glycosyl transferase, family 2	0.00268274	0.00279867	0.00317988	0.00287396	0.00401735	0.00268639	0.00190541	0.00284769	0.00225493	0.00240068	0.00344281	0.00211911	0.00328428	0.00255544	0.00295125
CDIF630erm_01368		hypothetical protein	0.0016898	0.00177672	0.00287954	0.00600164	0.00476502	0.00109919	0.00336627	0.00458949	0.00154154	0.00211483	0.00209219	0.00230985	0.00187837	0.00387226	0.00255541
CDIF630erm_01372	deoB	phosphopentomutase	0.0016992	0.00223491	0.00139118	0.00251661	0.0028288	0.0029611	0.00240447	0.00245955	0.00245587	0.00193541	0.00191167	0.00203985	0.00256313	0.00249115	0.00511765
CDIF630erm_01373	pupG	purine-nucleoside phosphorylase	0.00675101	0.00646541	0.00474032	0.00328967	0.00726178	0.00578678	0.00366537	0.00556173	0.00543942	0.00497848	0.00545101	0.0040569	0.00783613	0.00681253	0.00679383
CDIF630erm_01375		uncharacterized protein, YceG-like	0.00219119	0.00199212	0.0024959	0.00171397	0.000924014	0.00294794	0.00145846	0.00122797	0.00152141	0.00215967	0.00231521	0.00195577	0.00136231	0.00169068	0.00136368
CDIF630erm_01377	yrrO	putative protease YrrO	0.00314723	0.00397491	0.00983776	0.00239629	0.0049905	0.00374845	0.00360192	0.004451	0.00758589	0.00401697	0.00353626	0.00472045	0.00459829	0.00458065	0.00274034
CDIF630erm_01398	efp	elongation factor P (EF-p)	0.0433536	0.0383132	0.0369356	0.0572883	0.0329146	0.0399839	0.030199	0.0407495	0.0469752	0.0327576	0.0437298	0.0394488	0.0478974	0.0480991	0.0600898
CDIF630erm_01402	smc	structural maintenance chromosome protein SMC	0.0030507	0.00350462	0.00496223	0.00460268	0.00435242	0.00366835	0.00298921	0.00516978	0.00226889	0.00144227	0.00308038	0.00203785	0.00514223	0.00315045	0.00918337
CDIF630erm_01403	ftsY	signal recognition particle receptor	0.0057177	0.0054509	0.00550267	0.00438383	0.00487244	0.00409739	0.00528159	0.00484206	0.00503652	0.0033276	0.00396588	0.00373056	0.00656329	0.00567025	0.00564181
CDIF630erm_01405	ffh	signal recognition particle protein	0.00923339	0.0054255	0.00519932	0.0062898	0.00660966	0.00886285	0.00776458	0.00627086	0.00628595	0.00441511	0.00753043	0.00604536	0.0106307	0.00736758	0.00658195
CDIF630erm_01406	rpsP	30S ribosomal protein S16	0.0839763	0.0927388	0.0774138	0.0804458	0.0746923	0.0667496	0.0841403	0.102175	0.108588	0.101821	0.101428	0.101937	0.111635	0.0992663	0.0917291
CDIF630erm_01407		putative RNA-binding protein	0.00699422	0.00835726	0.00692881	0.00828973	0.00561336	0.00616352	0.00620878	0.0083636	0.00707518	0.0057245	0.00621461	0.00661546	0.00735027	0.00885347	0.00646381
CDIF630erm_01408	rimM	16S rRNA processing protein RimM	0.00646421	0.00590786	0.00662572	0.00919668	0.00482687	0.00528235	0.00581381	0.00817491	0.00401144	0.00470202	0.008502	0.00670342	0.00766563	0.00902998	0.0081032
CDIF630erm_01410	rplS	50S ribosomal protein L19	0.125528	0.133522	0.116426	0.0536238	0.114841	0.100625	0.125219	0.100647	0.0855316	0.127066	0.087174	0.105555	0.0995632	0.125238	0.112569
CDIF630erm_01414	nrdZ	vitamin B12-dependent ribonucleoside-diphosphate reductase	0.00261372	0.00308551	0.0120729	0.00511638	0.00309257	0.00427021	0.00290017	0.00923918	0.00286449	0.00563982	0.00783658	0.00209015	0.00290638	0.00842332	0.0122314
CDIF630erm_01416		putative (S)-2-hydroxy-acid oxidase	0.0186802	0.0165613	0.0153303	0.0135674	0.0182773	0.0112247	0.0166267	0.0180234	0.0182876	0.0157161	0.0175354	0.0166256	0.0143472	0.0131031	0.0125068
CDIF630erm_01428	codY	transcriptional regulator, GTP-sensing pleiotropic repressor codY	0.0452733	0.032462	0.0388764	0.0336132	0.0470788	0.0409518	0.0348083	0.0419602	0.041862	0.0374603	0.041257	0.0459903	0.0563247	0.050801	0.0470545
CDIF630erm_01432	iscS2	cysteine desulfurase	0.0367129	0.03828	0.0286061	0.053751	0.0693289	0.0681306	0.0913959	0.0753306	0.0795882	0.0640677	0.0620028	0.0682038	0.0383695	0.0296485	0.0291388
CDIF630erm_01433		fe-s iron-sulfur cluster assembly protein, nifu family	0.00935073	0.0118281	0.0150452	0.0364168	0.0379976	0.0604086	0.0478829	0.0394559	0.0385565	0.0425963	0.0602025	0.0359429	0.0197129	0.0170678	0.0189769
CDIF630erm_01434	mnmA	transfer RNA-specific 2-thiouridylase MnmA	0.00344205	0.00579518	0.00462308	0.00185783	0.011671	0.00676083	0.00502796	0.00629775	0.00694753	0.0034345	0.00170452	0.00798734	0.00457844	0.00983428	0.00480662
CDIF630erm_01436	alaS	alanine-tRNA synthetase	0.0288972	0.0275801	0.0269998	0.0317217	0.0250245	0.0296527	0.0234418	0.0276456	0.0257472	0.0280896	0.0263074	0.0258468	0.0285831	0.0290998	0.0263469
CDIF630erm_01441	fur	transcriptional regulator, Fur family	0.00999798	0.00781705	0.0109404	0.00802678	0.00538118	0.00852569	0.00451631	0.00463265	0.00546	0.00834695	0.00874233	0.00630253	0.00923607	0.00698525	0.00829584
CDIF630erm_01443		ribonuclease J family protein	0.008418	0.00898208	0.00829341	0.0142421	0.00728764	0.00754052	0.00685143	0.00743972	0.00830495	0.00775131	0.0115069	0.0121877	0.00906009	0.0104432	0.00976261
CDIF630erm_01454	pepA	cytosol aminopeptidase	0.00483458	0.00509668	0.00286802	0.0031824	0.00539856	0.00375601	0.00396825	0.0039139	0.00451323	0.00302739	0.0050688	0.00630443	0.00314737	0.00283482	0.00355028
CDIF630erm_01457		putative MazG-like pyrophosphohydrolase	0.00772173	0.00748531	0.00689752	0.0018848	0.00588741	0.00537517	0.00724825	0.00802323	0.00695341	0.0031852	0.00492144	0.00502909	0.00892281	0.00881042	0.0060194
CDIF630erm_01458	npdA	NAD-dependent deacetylase, Sir2 family	0.00428668	0.0037689	0.00487478	0.00192576	0.00335363	0.00303599	0.00193791	0.00365221	0.00308413	0.0032534	0.00349162	0.0042038	0.00358663	0.00322537	0.00190995
CDIF630erm_01459	acd	mannosyl-glycoprotein endo-beta-N-acetylglucosamidase	0.00605131	0.0040582	0.00388076	0.00429552	0.00277414	0.00555281	0.00224142	0.00254258	0.00332743	0.00609396	0.00396653	0.00259952	0.00726159	0.00360618	0.00708445
CDIF630erm_01461	rimP	ribosome maturation factor rimp	0.00618075	0.00540954	0.00448822	0.00499843	0.00640488	0.00366348	0.00468641	0.00454347	0.00578084	0.00442298	0.00205536	0.0041959	0.00535199	0.00778893	0.00881036
CDIF630erm_01462	nusA	transcription elongation protein	0.0266877	0.023242	0.0226867	0.0169664	0.0216202	0.0224482	0.0182721	0.0216993	0.0215112	0.0195004	0.0201316	0.0216015	0.0340175	0.0310209	0.0267769
CDIF630erm_01465	infB	translation initiation factor IF-2	0.0321783	0.0207975	0.0204171	0.0402203	0.0244589	0.0210949	0.0261652	0.0294968	0.0288765	0.0188445	0.0237399	0.024248	0.0349213	0.0248092	0.0259897
CDIF630erm_01466	rbfA	Ribosome-binding factor A	0.00258561	0.00316513	0.00306126	0.0057441	0.00407072	0.00149824	0.00252696	0.00399995	0.00666145	0.0026768	0.0023248	0.00271739	0.00337512	0.00283548	0.00362147
CDIF630erm_01467		putative rna-binding protein	0.00255247	0.001216	0.00244453	0.00287523	0.00128216	0.00187603	0.000979936	0.00158541	0.000620112	0.00290516	0.00137216	0.00107431	0.00287369	0.00183569	0.00416224
CDIF630erm_01472	rpsO	30S ribosomal protein S15	0.0424008	0.0546482	0.0647723	0.0311016	0.0322903	0.0768331	0.042674	0.0474542	0.0435188	0.0430964	0.0390484	0.0344118	0.0384345	0.0756798	0.0774833
CDIF630erm_01474	pnp	polyribonucleotide nucleotidyltransferase	0.03926	0.0298965	0.0313458	0.0234198	0.0289723	0.0274923	0.0303428	0.0319093	0.0364803	0.0180318	0.0280146	0.03491	0.0345944	0.0251232	0.0251808
CDIF630erm_01476		putative peptidase, M16 family	0.00172124	0.00178978	0.00128802	0.00274944	0.00131455	0.00219066	0.00403997	0.00115859	0.00191661	0.00214216	0.00216452	0.00134102	0.00116289	0.00401327	0.00232245
CDIF630erm_01478	dapG	aspartokinase	0.0129421	0.0178041	0.0192286	0.0125137	0.0152297	0.0139533	0.0172616	0.0111864	0.0181094	0.0186391	0.0126232	0.0199641	0.0150318	0.0217911	0.0170525
CDIF630erm_01480	ftsK	DNA FtsK / SpoIIIE translocase	0.00499537	0.00592129	0.00381536	0.00361543	0.0024772	0.00182676	0.00422483	0.0047263	0.00325881	0.00233775	0.00354321	0.00483375	0.00210976	0.00390998	0.00205737
CDIF630erm_01482	rimO	ribosomal protein S12 methylthiotransferase	0.00194417	0.00181375	0.00134495	0.00109164	0.00283911	0.00134025	0.0014474	0.00272178	0.0119673	0.00123768	0.000884489	0.0011017	0.00441076	0.00108926	0.00152562
CDIF630erm_01484	recA	protein RecA (Recombinase a)	0.0204039	0.0199844	0.0211344	0.0100251	0.0179214	0.020038	0.0162187	0.020895	0.0233821	0.0136147	0.0118247	0.0206407	0.0174885	0.0213775	0.0218765
CDIF630erm_01485		RNase Y	0.00939607	0.0118084	0.0116127	0.00444829	0.00707827	0.0059837	0.00952867	0.0109678	0.0091683	0.0209453	0.00749683	0.0101833	0.00947451	0.00968338	0.00791339
CDIF630erm_01490	purB	adenylosuccinate lyase	0.0127784	0.00962599	0.0116739	0.00549107	0.0122627	0.0113518	0.0123937	0.0118631	0.0119952	0.00947877	0.00851151	0.0090439	0.00919324	0.011148	0.00956902
CDIF630erm_01491		transcriptional regulator, MarR family	0.00522024	0.00401277	0.00345404	0.00298503	0.0046133	0.00410156	0.00662611	0.00779682	0.00717377	0.00304535	0.00538158	0.00699066	0.007927	0.00656439	0.00673117
CDIF630erm_01495		putative alanine aminotransferase	0.0724138	0.0636085	0.0575724	0.0636784	0.065155	0.0523475	0.0727282	0.0701752	0.0720754	0.0568733	0.0657774	0.0530388	0.0565791	0.0446069	0.0423032
CDIF630erm_01499	glnA	glutamine synthetase	0.00731816	0.00661775	0.00501297	0.00861546	0.00740996	0.00797652	0.00987812	0.00784441	0.00913657	0.00490013	0.00625456	0.00848645	0.00634982	0.00718156	0.00511997
CDIF630erm_01512		putative CBS domain-containing protein	0.00264767	0.00210884	0.00332377	0.00206825	0.00308216	0.0026333	0.00194718	0.00234511	0.00310753	0.00144372	0.00231777	0.00282622	0.00440688	0.0023334	0.00315976
CDIF630erm_01513		putative peptidyl-prolyl isomerase	0.0808534	0.0883451	0.0778391	0.109109	0.101754	0.0798218	0.088259	0.100117	0.0947592	0.0869993	0.0859057	0.08967	0.109082	0.106527	0.108935
CDIF630erm_01535		putative membrane protein	0.00887513	0.00572504	0.00942546	0.00799796	0.00772447	0.0106636	0.00749739	0.00814298	0.00846048	0.00511187	0.00373508	0.00696054	0.00963521	0.00891472	0.00999201
CDIF630erm_01543		transcriptional regulator, GntR family	0.00178597	0.0022682	0.00188938	0.00362174	0.00295986	0.00233025	0.00195653	0.00261904	0.00216847	0.00219186	0.00465662	0.00216831	0.00194601	0.00128569	0.00200495
CDIF630erm_01544		putative lamB-like protein, UPF0271 family	0.00925438	0.0081021	0.00780259	0.0120564	0.0133249	0.00643977	0.00799337	0.0140829	0.00841798	0.00749093	0.00806708	0.00760453	0.0054212	0.00462226	0.00356971
CDIF630erm_01546	kipI	kinase A inhibitor	0.00695964	0.00492933	0.00727233	0.00220121	0.00594044	0.00518465	0.00526087	0.00435359	0.00366022	0.00403592	0.00497147	0.00621468	0.00430008	0.00186551	0.00251243
CDIF630erm_01556		putative amino acid amidase	0.00273658	0.00212203	0.00302189	0.00128629	0.00336211	0.00205912	0.00322193	0.00341903	0.00307373	0.00196441	0.00100261	0.00253732	0.00357446	0.00343414	0.00289345
CDIF630erm_01560		hypothetical protein	0.00524823	0.00830934	0.0049611	0.00910953	0.00903137	0.00652221	0.00729556	0.00711314	0.00765931	0.00664194	0.00594316	0.00813671	0.00881571	0.00704832	0.00742961
CDIF630erm_01561		putative nicotinamidase	0.00437281	0.00501808	0.00418836	0.0039457	0.00399952	0.00396568	0.00461813	0.00581209	0.00419984	0.0057411	0.00640911	0.00354489	0.00681233	0.00612708	0.00722859
CDIF630erm_01566		ABC-type transport system, ATP-binding protein	0.00589226	0.00216565	0.00161107	0.00193189	0.00139293	0.00336003	0.00207382	0.00310959	0.00260723	0.00183493	0.00213613	0.00250148	0.00294831	0.00350893	0.00261071
CDIF630erm_01569	ddl	D-alanine--D-alanine ligase	0.00148885	0.00424655	0.00157948	0.00285851	0.00320506	0.00237536	0.00197393	0.00221061	0.00238877	0.002188	0.0016359	0.00209677	0.00119904	0.00169241	0.00401967
CDIF630erm_01570		putative competence-damage inducible protein, CinA family	0.00761847	0.00420486	0.00523967	0.00409729	0.00552343	0.00486764	0.00456833	0.00568462	0.00363696	0.00518548	0.00330746	0.00355674	0.00453573	0.00409809	0.00502812
CDIF630erm_01571		putative hydrolase, HAD superfamily, subfamily IIB	0.0026424	0.00229424	0.00158689	0.00241477	0.00212615	0.00261585	0.00437749	0.00213892	0.00368138	0.00146893	0.00139711	0.00285945	0.00293104	0.00321481	0.00157419
CDIF630erm_01578		putative ATP-binding protein	0.0107724	0.0076499	0.00758738	0.00286526	0.00422308	0.00657292	0.00501873	0.00677542	0.00478017	0.00527045	0.00422342	0.00283187	0.0077855	0.0067923	0.00430178
CDIF630erm_01600		putative hydrolase	0.00169257	0.00167745	0.00217386	0.0022783	0.00166883	0.000979234	0.00135126	0.00182523	0.00204954	0.00155684	0.00140767	0.00157771	0.00147271	0.0009336	0.00318504
CDIF630erm_01613	folE	GTP cyclohydrolase 1	0.00209022	0.0059379	0.0077615	0.00109344	0.00373007	0.00382558	0.00167776	0.0037297	0.002811	0.00267861	0.00221629	0.00280031	0.00372113	0.00443729	0.00452286
CDIF630erm_01614	folP	dihydropteroate synthase	0.00382943	0.00336133	0.00319493	0.00693076	0.00330404	0.003614	0.00386885	0.0037747	0.00337016	0.00196251	0.00275345	0.00226671	0.00383315	0.00469605	0.00284059
CDIF630erm_01619	sigA1	RNA polymerase sigma factor SigA1 (sigma-43)	0.0067577	0.00918232	0.00528432	0.00361149	0.00835499	0.0052876	0.00482321	0.00959747	0.00660645	0.00292587	0.00722107	0.00717161	0.00843001	0.00537802	0.00802536
CDIF630erm_01621		GTP cyclohydrolase 1 type 2	0.00185103	0.00123576	0.00208249	0.00321633	0.00195997	0.00220494	0.00153843	0.00179719	0.00233664	0.00174823	0.00203996	0.00209634	0.00155415	0.00212872	0.00236601
CDIF630erm_01623		putative 5-nitroimidazole antibiotic resistance protein	0.0105592	0.007896	0.00816222	0.00748441	0.00767175	0.00712669	0.00936387	0.0103547	0.0120796	0.00419524	0.00422768	0.00979763	0.00663211	0.00623239	0.00741421
CDIF630erm_01632		putative iron-sulfur protein	0.00187147	0.00493941	0.00228622	0.000664515	0.00194543	0.00212707	0.00187257	0.00242727	0.000819547	0.00101817	0.00123879	0.00199214	0.00130992	0.00271062	0.00364857
CDIF630erm_01633	cwp20	putative cell surface protein , putative penicillin-binding protein cwp20	0.00611946	0.00723828	0.00477235	0.00659811	0.00592954	0.00322883	0.0053409	0.00528918	0.00525096	0.00506452	0.004363	0.00537054	0.00338905	0.00362016	0.00224201
CDIF630erm_01638	rbr2	reverse rubrerythrin	0.0596279	0.065693	0.0475841	0.0487379	0.0479799	0.0464866	0.0351002	0.0329045	0.035741	0.0361754	0.0472798	0.0541768	0.0507464	0.0361775	0.044997
CDIF630erm_01648	ssuA1	ABC-type transport system, alkanesulfonates-family extracellular solute-binding protein	0.00675597	0.00583503	0.00362931	0.00754735	0.00854901	0.00469931	0.0116156	0.00709306	0.00927243	0.00329248	0.00202481	0.00322925	0.00470158	0.00450598	0.00345494
CDIF630erm_01656	metQ	ABC-type transport system, methionine-specific substrate-binding lipoprotein	0.00576334	0.00526307	0.00557809	0.00357487	0.00532073	0.00714986	0.00517903	0.00334971	0.00465381	0.00488667	0.00654754	0.0052471	0.00952147	0.0095986	0.00748241
CDIF630erm_01659		transcriptional regulator, HTH-type	0.0158003	0.0141855	0.0129402	0.0137577	0.0107941	0.00799017	0.00636644	0.00850326	0.00938002	0.0089057	0.00867963	0.00918614	0.0184871	0.0127181	0.0121802
CDIF630erm_01660	proC1	pyrroline-5-carboxylate reductase	0.00859209	0.0123798	0.0122252	0.011795	0.00940588	0.00988874	0.0114242	0.0107925	0.00969913	0.010819	0.0123311	0.00872814	0.0120941	0.0150918	0.0163785
CDIF630erm_01661		uncharacterized protein	0.0125854	0.0138673	0.0101939	0.00659664	0.0075156	0.0128358	0.0109978	0.00972907	0.0102656	0.0118811	0.0100007	0.0111889	0.0135012	0.0103239	0.0105423
CDIF630erm_01662		uncharacterized protein	0.00820124	0.00849353	0.00855033	0.0117429	0.0128801	0.014234	0.0117272	0.0190717	0.0168407	0.00807073	0.0107075	0.0152879	0.0191502	0.0139805	0.0165273
CDIF630erm_01667	deoC	deoxyribose-phosphate aldolase	0.00380856	0.00468807	0.00514111	0.0084671	0.00522246	0.0047768	0.00581137	0.0066615	0.00756648	0.00501413	0.00625453	0.00626098	0.00630906	0.00724591	0.00652859
CDIF630erm_01675		LUD-like protein	0.00131606	0.00125422	0.00167059	0.00628843	0.00184866	0.00241389	0.00254758	0.00277896	0.00237701	0.00322528	0.0023253	0.00179123	0.00232205	0.00216328	0.00147909
CDIF630erm_01686		putative acyltransferase	0.00605418	0.00489921	0.00535387	0.00220067	0.00396729	0.00496859	0.00678687	0.00718526	0.00598379	0.00404152	0.00356137	0.00392815	0.00497755	0.00404829	0.00546202
CDIF630erm_01689	tyrS	tyrosine--tRNA ligase	0.022263	0.0213217	0.0252	0.0177312	0.0213988	0.0194389	0.0240491	0.0236552	0.0253353	0.0217213	0.0278756	0.023416	0.0235818	0.0211271	0.0248188
CDIF630erm_01692	rbr3	reverse rubrerythrin	0.0884145	0.0568281	0.0685817	0.140471	0.0795796	0.0700668	0.0722875	0.101046	0.0894448	0.0767245	0.0849955	0.0850897	0.0808477	0.071087	0.0829648
CDIF630erm_01694	pyrC	dihydroorotase	0.000979265	0.00206573	0.0022898	0.00412985	0.00308723	0.00502622	0.00194935	0.00219118	0.0017721	0.00176804	0.00547624	0.0020883	0.002586	0.00338686	0.00215008
CDIF630erm_01697		ABC-type transport system, permease	0.00370131	0.00608803	0.00404391	0.00384895	0.00521129	0.00687768	0.00262965	0.0038604	0.00284692	0.00342363	0.0033826	0.00362668	0.00792439	0.00433069	0.00525325
CDIF630erm_01703	sseA1	3-mercaptopyruvate sulfurtransferase	0.00929764	0.00805821	0.00600398	0.00839665	0.00717142	0.00590339	0.00836407	0.0105593	0.0102765	0.00544395	0.00585272	0.00765244	0.0117873	0.0112174	0.00771327
CDIF630erm_01704	nfnA	NADH-dependent reduced ferredoxin:NADP+ oxidoreductase, subunit alpha	0.0636977	0.0668096	0.0736894	0.0388465	0.0662299	0.0662908	0.0823006	0.0646146	0.0827065	0.0683084	0.0652901	0.0555855	0.07022	0.0686513	0.0725614
CDIF630erm_01705	nfnB	NADH-dependent reduced ferredoxin:NADP+ oxidoreductase, subunit beta	0.0623127	0.0601465	0.0620291	0.0824579	0.0626007	0.0565531	0.0752883	0.073446	0.0723288	0.0737565	0.0743988	0.0612977	0.055535	0.0609318	0.0597499
CDIF630erm_01721	hisA	1-(5-phosphoribosyl)-5-[(5-phosphoribosylamino)methylideneamino] imidazole-4-carboxamide isomerase	0.00259771	0.00274364	0.00203966	0.00522129	0.00352764	0.00206296	0.00225875	0.00331836	0.00286618	0.00314245	0.00351483	0.00152583	0.00323234	0.00212792	0.00272603
CDIF630erm_01722	hisF	imidazole glycerol phosphate synthase subunit HisF	0.00162469	0.00112228	0.00104946	0.00162781	0.00128406	0.00118822	0.00270639	0.00156012	0.00428037	0.00171777	0.00581976	0.00258058	0.00136346	0.00125684	0.00236397
CDIF630erm_01723	hisI	bifunctional phosphoribosyl-AMP cyclohydrolase / phosphoribosyl-ATP pyrophosphatase	0.0030705	0.00474092	0.0053675	0.00190729	0.00376587	0.00279584	0.00326762	0.00383463	0.00396935	0.00325946	0.00387676	0.00218175	0.00452471	0.00562051	0.00634015
CDIF630erm_01726		putative peptidyl-prolyl isomerase	0.00498292	0.00222268	0.00158126	0.00275155	0.00184428	0.00107793	0.00324828	0.0016538	0.00101583	0.000717798	0.0012666	0.00211023	0.00232892	0.00150217	0.00147939
CDIF630erm_01746	pgcA1	phosphoglucomutase	0.0019395	0.00458323	0.00630905	0.00301016	0.00954876	0.00781765	0.00164959	0.00487097	0.00243319	0.0118514	0.00200079	0.00370904	0.00353327	0.00335687	0.0148421
CDIF630erm_01767	cysK	cysteine synthase	0.0129106	0.00853441	0.00806094	0.0730693	0.0854788	0.0973121	0.0722533	0.0834149	0.0827716	0.0842311	0.0870781	0.0855888	0.0286793	0.0175949	0.0204209
CDIF630erm_01790		ABC-type transport system, ATP-binding protein	0.0033902	0.00288959	0.0030404	0.00267547	0.00124507	0.000886325	0.00137597	0.00128955	0.0103741	0.00299237	0.00162818	0.000942529	0.00282877	0.00341463	0.00330964
CDIF630erm_01794		ABC-type transport system, multidrug-family ATP-binding protein	0.00177704	0.00188962	0.00108292	0.004226	0.00288016	0.00138174	0.00148988	0.00258207	0.00133573	0.00147724	0.00184244	0.00254698	0.00479186	0.00312112	0.00277488
CDIF630erm_01800	fprAnorR	NADH oxidase (H2O-forming)	0.00823817	0.0121102	0.00858375	0.00661809	0.00358039	0.00649162	0.00465081	0.00545016	0.00432033	0.00524858	0.00510717	0.00754751	0.00525345	0.0089448	0.00550862
CDIF630erm_01811	terD1	tellurium resistance protein terD	0.0672618	0.0566311	0.0649032	0.045842	0.0580989	0.0588917	0.0622268	0.0583463	0.0613344	0.0447454	0.0579584	0.0605434	0.0490352	0.0601598	0.0582867
CDIF630erm_01812	terD2	tellurium resistance protein terD	0.0775564	0.0895073	0.0805497	0.0768617	0.0967537	0.0641617	0.100507	0.106698	0.101368	0.0629053	0.078031	0.0824134	0.0847342	0.0720044	0.0660771
CDIF630erm_01813	terD3	tellurium resistance protein terD	0.0205166	0.0165405	0.0209736	0.0207768	0.0166329	0.0211647	0.0224085	0.0234453	0.0203357	0.0161965	0.0250445	0.0174275	0.020765	0.021474	0.0205436
CDIF630erm_01814		putative calcium-transporting ATPase	0.016087	0.0178187	0.0146559	0.0142017	0.0153159	0.01612	0.0162962	0.0182924	0.0163246	0.0143339	0.0135995	0.0129927	0.0140097	0.013371	0.0112321
CDIF630erm_01816		putative tellurite associated resistance protein	0.0250524	0.0218802	0.0195858	0.0424878	0.0200545	0.0165933	0.0231481	0.0246444	0.0215379	0.017996	0.0266041	0.0138062	0.0262708	0.0289164	0.0183566
CDIF630erm_01819	stiP	cysteine protease	0.00413291	0.00273785	0.00277953	0.00303982	0.00192765	0.00283995	0.00264678	0.00280196	0.00297041	0.000728004	0.00149211	0.00127325	0.00171395	0.00331068	0.00417384
CDIF630erm_01830		putative D-methionine-binding lipoprotein	0.0011936	0.00217654	0.00142295	0.00187187	0.00251089	0.00232894	0.00170592	0.00241062	0.00279338	0.00307044	0.00319817	0.00291671	0.00168673	0.00336619	0.00239363
CDIF630erm_01832	lplA	lipoate-protein ligase	0.00201021	0.00295096	0.00157837	0.00270028	0.00431244	0.00164137	0.00214495	0.00198398	0.00129019	0.00201299	0.00226254	0.00124299	0.0027313	0.00333481	0.00123261
CDIF630erm_01838	gcvTPA	glycine cleavage system, subunit A	0.00420449	0.0367579	0.00284233	0.00822071	0.0405873	0.03239	0.0181449	0.0136442	0.0113789	0.0384826	0.0236323	0.0338262	0.0155293	0.00272526	0.00903064
CDIF630erm_01839	gcvPB	glycine cleavage system, subunit B	0.00215023	0.00234133	0.00256308	0.00340746	0.00406922	0.00491405	0.00513523	0.00361291	0.00624096	0.0046917	0.00774991	0.00659782	0.00191463	0.00273419	0.00249152
CDIF630erm_01844	guaD	guanine deaminase	0.00163053	0.0031237	0.0017313	0.00321065	0.00207535	0.00235732	0.00222429	0.00582929	0.00241361	0.00288748	0.0023849	0.00183613	0.00405507	0.00274317	0.00314453
CDIF630erm_01859		putative NADPH-dependent FMN reductase	0.010803	0.00648653	0.00674516	0.00619802	0.00744576	0.00666274	0.00906731	0.0091837	0.0116083	0.00360674	0.0075619	0.00631944	0.0112982	0.00896992	0.00823011
CDIF630erm_01867	iunH	inosine / uridine-preferring nucleoside hydrolase	0.0152165	0.0146666	0.0228089	0.00824672	0.0159735	0.0189137	0.0110889	0.019581	0.0133286	0.0175761	0.0185738	0.0173013	0.0290874	0.0236453	0.0213095
CDIF630erm_01869		putative radical SAM superfamily protein	0.0127376	0.0131189	0.0096377	0.00971673	0.0113906	0.00989605	0.00779613	0.011873	0.0114615	0.00760073	0.00594627	0.00836659	0.0182837	0.0164611	0.0151215
CDIF630erm_01875	trxA1	thioredoxin	0.0159253	0.0214456	0.0196591	0.0231172	0.0310405	0.0292692	0.023423	0.0226599	0.0293413	0.0173533	0.0221391	0.0268738	0.017722	0.0208888	0.029837
CDIF630erm_01876	trxB1	thioredoxin reductase	0.00366766	0.00341353	0.00232095	0.000987269	0.00380024	0.00362556	0.00206665	0.00301783	0.00310539	0.00322037	0.00193642	0.00345212	0.00446186	0.00292526	0.00242119
CDIF630erm_01878		putative dinitrogenase iron-molybdenum cofactor	0.00711439	0.0127403	0.0100187	0.00270311	0.0179394	0.0138645	0.0160079	0.0252985	0.0215417	0.0167307	0.0140497	0.0226743	0.0048403	0.0124121	0.0108621
CDIF630erm_01881	alsT	sodium:alanine symporter	0.0213651	0.0206497	0.0144341	0.0025988	0.0176261	0.0169932	0.0175027	0.0230661	0.0159761	0.00784685	0.0103672	0.0123315	0.0233378	0.0218503	0.0158621
CDIF630erm_01882	ribH	6,7-dimethyl-8-ribityllumazine synthase	0.00355738	0.0024631	0.0028054	0.00425836	0.00204337	0.00174527	0.00444959	0.0030702	0.004043	0.00296826	0.00389547	0.00232923	0.00172328	0.000548967	0.00168971
CDIF630erm_01899		uncharacterized protein, UPF0145 family	0.0151367	0.0139055	0.0125379	0.00665304	0.0137296	0.00752474	0.0169645	0.0145246	0.00913183	0.0115062	0.00930567	0.011076	0.0150574	0.0145196	0.0148245
CDIF630erm_01906		uncharacterized protein	0.00667484	0.00974446	0.00699244	0.00135675	0.0119754	0.0102287	0.0141997	0.00761609	0.00822312	0.00956298	0.0112708	0.00972124	0.00803737	0.013521	0.00914151
CDIF630erm_01907		putative hydantoinase	0.00299646	0.00375957	0.00357829	0.00577363	0.0038879	0.00389337	0.0043946	0.00391718	0.00405608	0.00407033	0.00266492	0.0055594	0.00501268	0.00389651	0.00351194
CDIF630erm_01909		putative hydantoinase	0.0053126	0.0063523	0.00596671	0.00587608	0.00570277	0.00487163	0.00831174	0.00693659	0.00470982	0.00551108	0.00515393	0.0046739	0.00756424	0.00687778	0.00747409
CDIF630erm_01921	mrp	iron-sulfur cluster carrier protein	0.0252171	0.0265288	0.0278295	0.0329887	0.026809	0.0211074	0.0242556	0.0254021	0.0281517	0.024182	0.0262574	0.0219873	0.023775	0.0239639	0.0246698
CDIF630erm_01941	add	adenosine deaminase	0.00519657	0.00444413	0.00401937	0.0125624	0.013425	0.00541669	0.0112127	0.00158762	0.00111763	0.00430898	0.00300261	0.00898791	0.00863678	0.00748283	0.00217981
CDIF630erm_01943	yjiM	putative 2-hydroxyacyl-CoA dehydratase	0.0691553	0.0518989	0.0484413	0.0405649	0.0435273	0.0458468	0.0426618	0.0505301	0.0403122	0.0449995	0.0662152	0.0377241	0.0546233	0.0576963	0.0532399
CDIF630erm_01944	yjiL	putative 2-hydroxyacyl-CoA dehydratase activase	0.0107592	0.010154	0.00764462	0.0117184	0.00998107	0.00963246	0.0100998	0.0103933	0.00903314	0.00851366	0.00694447	0.00798557	0.0157427	0.0105274	0.00971856
CDIF630erm_01945	cwp13	putative cell wall binding protein cwp13	0.00828198	0.0077102	0.012197	0.00531989	0.012851	0.0104244	0.0110774	0.0112018	0.00517337	0.00831518	0.00927575	0.00638945	0.0105145	0.0148571	0.00987019
CDIF630erm_01955		methyltransferase domain protein	0.00128656	0.00213779	0.000597855	0.00191624	0.00110951	0.00114592	0.00172554	0.00112528	0.00165733	0.00145616	0.00104614	0.00151538	0.000223942	0.000728061	0.000324132
CDIF630erm_01961		putative phenylalanyl-tRNA synthetase beta chain	0.00734561	0.00707621	0.00502084	0.000849195	0.00875184	0.00369057	0.00552545	0.00642684	0.00812859	0.00363198	0.00449686	0.00551122	0.00388853	0.00478893	0.00584508
CDIF630erm_01965		putative membrane protein	0.0230124	0.018292	0.0187851	0.0139078	0.0117328	0.0145521	0.0140808	0.0142854	0.0128275	0.0128637	0.0212471	0.0139884	0.0239417	0.0272853	0.024765
CDIF630erm_01968		putative monooxygenase	0.00351507	0.00592147	0.00383822	0.00263303	0.00546561	0.0014298	0.00487946	0.00428086	0.00417716	0.00318805	0.00366533	0.00417054	0.00429935	0.00470579	0.00342633
CDIF630erm_01978		putative RNA methylase	0.00368578	0.00402307	0.00238116	0.00552357	0.00514613	0.00168936	0.00362547	0.00444588	0.00413794	0.00214817	0.00184954	0.00407178	0.00295562	0.00214437	0.00249534
CDIF630erm_01979		putative lipoprotein	0.00155812	0.00139999	0.000923185	0.00120458	0.00233036	0.000576474	0.00197137	0.00225738	0.00104921	0.00264683	0.00375015	0.00192943	0.00165633	0.00103313	0.00480591
CDIF630erm_01980		two-component response regulator	0.00615384	0.00606972	0.00462557	0.00166629	0.00392829	0.00468229	0.00543296	0.00352007	0.00834098	0.00484041	0.0042838	0.00445126	0.00879512	0.00828625	0.00758315
CDIF630erm_01991	tdh	L-threonine 3-dehydrogenase	0.00223114	0.00496829	0.00949993	0.00473118	0.00307998	0.00368256	0.00421576	0.00510791	0.0101278	0.00410542	0.00321219	0.0044819	0.00238892	0.00416539	0.00404209
CDIF630erm_01998	terD4	tellurium resistance protein terD	0.0343465	0.0321006	0.0353472	0.0208157	0.0317998	0.0244076	0.0313681	0.0390498	0.0411076	0.0296163	0.0365815	0.0303935	0.0307107	0.0365953	0.038126
CDIF630erm_01999	terD5	tellurium resistance protein terD	0.0238806	0.0162876	0.0227353	0.0167577	0.0198218	0.0129124	0.0225277	0.0197559	0.0234607	0.0149415	0.0211466	0.0178549	0.022881	0.0207846	0.0201674
CDIF630erm_02010		transcriptional regulator, beta-lactam repressor	0.00520002	0.00345187	0.00577443	0.00534188	0.00334398	0.0046534	0.00298329	0.00420824	0.0035087	0.0045061	0.00398418	0.00397606	0.00428219	0.005729	0.00508272
CDIF630erm_02014		putative phosphatase, phosphoserine phosphatase-like	0.00506493	0.00418235	0.00379221	0.00398237	0.00407803	0.00373508	0.00483046	0.0030884	0.00511814	0.00420815	0.00458226	0.00478521	0.00560093	0.00446851	0.00591985
CDIF630erm_02016	cmk	cytidylate kinase	0.00333163	0.00276451	0.00331733	0.00251542	0.00208453	0.00382634	0.00202435	0.00368484	0.00253324	0.00378922	0.00382824	0.00380084	0.0024596	0.00325413	0.00373087
CDIF630erm_02018	ispH	4-hydroxy-3-methylbut-2-enyl diphosphate reductase	0.00388689	0.00296216	0.00407093	0.000843314	0.00345647	0.00271006	0.00346563	0.0033622	0.00312949	0.00276577	0.00427768	0.00251736	0.00388462	0.00329053	0.00375889
CDIF630erm_02034	aroF2	3-deoxy-7-phosphoheptulonate synthase	0.00311379	0.00241728	0.00162077	0.00609239	0.00519059	0.00207205	0.00217947	0.00239132	0.00199948	0.00154811	0.0015676	0.00219935	0.0010613	0.00340537	0.00028358
CDIF630erm_02036	aroA	3-phosphoshikimate 1-carboxyvinyltransferase	0.00202596	0.00274297	0.0024989	0.00267883	0.0029634	0.00108687	0.00175274	0.00111348	0.00390287	0.00251681	0.000494685	0.000862176	0.00198027	0.00317349	0.00347267
CDIF630erm_02039	aroE1	shikimate dehydrogenase	0.0013324	0.00214578	0.00149395	0.0051789	0.00142335	0.000795457	0.00218747	0.00152589	0.00124006	0.00293377	0.00167727	0.00167184	0.00209036	0.00313414	0.00481111
CDIF630erm_02040	aroK	shikimate kinase	0.00182558	0.00429038	0.00314835	0.00175962	0.00432077	0.00298252	0.0044377	0.0229188	0.00761065	0.00226866	0.0026266	0.00254878	0.00516899	0.0032598	0.00337018
CDIF630erm_02100		putative membrane protein	0.0355976	0.0262646	0.0386103	0.0218602	0.0253028	0.0463642	0.0536376	0.0300857	0.0505517	0.0308438	0.0409087	0.0175302	0.0390837	0.0282864	0.0339819
CDIF630erm_02103		putative phage-related cell wall hydrolase (endolysin)	0.00606561	0.00481162	0.00347236	0.00734875	0.00429966	0.00239244	0.00542937	0.0056761	0.00394454	0.00376743	0.00224844	0.00257983	0.00330119	0.00317549	0.00369361
CDIF630erm_02138		GATS-like ACT domain protein	0.00565536	0.00524867	0.00474448	0.00621345	0.00611691	0.00449142	0.0059263	0.00614378	0.00682484	0.00670361	0.00673394	0.0061716	0.00817158	0.00548466	0.00642392
CDIF630erm_02140	accA	acetyl-CoA carboxylase, subunit alpha	0.00348474	0.00750166	0.00448414	0.00515118	0.00613868	0.00411912	0.00598244	0.00513839	0.0056169	0.00934816	0.00522991	0.00447264	0.00722172	0.00663603	0.00504802
CDIF630erm_02141	accD	acetyl-CoA carboxylase, subunit beta	0.00639839	0.00525184	0.0050065	0.00349993	0.00433036	0.00538708	0.0057036	0.00468785	0.00474931	0.00491976	0.00287882	0.00303199	0.00386211	0.00742659	0.00351532
CDIF630erm_02142	accC	biotin carboxylase	0.016585	0.011653	0.0117959	0.0118618	0.0132215	0.009889	0.0137401	0.0117518	0.0115339	0.00995314	0.0137335	0.0136655	0.0155004	0.0128226	0.00818397
CDIF630erm_02143	accB	biotin carboxyl carrier protein	0.0170117	0.0138039	0.0140994	0.0150215	0.0188377	0.00888715	0.0136701	0.0173326	0.0128562	0.0110899	0.0158678	0.0141077	0.0119839	0.0127149	0.0146318
CDIF630erm_02148		FeS cluster biogenesis protein	0.037656	0.0256826	0.0366058	0.0579241	0.0474061	0.0325049	0.0293926	0.0280864	0.046411	0.0347334	0.0737122	0.0390119	0.0390218	0.0300969	0.043073
CDIF630erm_02158		uncharacterized protein, coenzyme F420:L-glutamate ligase-like	0.0196767	0.0196588	0.0191107	0.0239434	0.0191287	0.0154196	0.0152913	0.0188487	0.0220394	0.0172339	0.0204012	0.015206	0.0219767	0.0247183	0.0236975
CDIF630erm_02174		putative oligonucleotide binding regulator	0.000736331	0.00121689	0.00154966	0.00382485	0.00154599	0.00132519	0.00166447	0.00249003	0.00187523	0.00167652	0.00284549	0.00067302	0.000893303	0.00156355	0.0021823
CDIF630erm_02175		putative enzyme, cyclase family	0.0137222	0.0101166	0.0100046	0.0242319	0.0156585	0.0101992	0.0180846	0.0173405	0.0171003	0.0117669	0.018924	0.0170323	0.0131347	0.0111716	0.0134151
CDIF630erm_02177		peptidase M20A, peptidase V-related	0.00612184	0.00570631	0.0059905	0.00375481	0.00541442	0.0050758	0.00769547	0.00488417	0.00738614	0.0062248	0.00480692	0.0064205	0.00597683	0.00786823	0.00521055
CDIF630erm_02178		aluminum resistance protein	0.00328168	0.00356382	0.00224981	0.00331261	0.00252324	0.00384878	0.00353055	0.00365856	0.00320912	0.00275894	0.00611886	0.0039774	0.00406326	0.00318827	0.0036919
CDIF630erm_02184		ABC-type transport system, extracellular solute-binding protein	0.00200875	0.00196714	0.00169569	0.00280279	0.00147974	0.00132468	0.00452038	0.0018596	0.00225018	0.00336455	0.00265132	0.00118804	0.00156409	0.00154612	0.000812954
CDIF630erm_02186		putative thiamine binding protein	0.00778501	0.0058534	0.00734831	0.0119861	0.00642022	0.00606819	0.00667774	0.0052278	0.00358443	0.00780841	0.00681375	0.00585064	0.00737527	0.00545338	0.00567378
CDIF630erm_02195	miaB	tRNA-2-methylthio-N(6)-dimethylallyladenosine synthase	0.0048164	0.00568519	0.00358011	0.00389407	0.00335781	0.00478845	0.00369043	0.00518614	0.00327161	0.00398004	0.00223658	0.00298354	0.00569335	0.0051853	0.00412319
CDIF630erm_02209		uncharacterized protein, AhpD-like	0.0369056	0.0350001	0.034053	0.0201594	0.0293909	0.0218147	0.0205489	0.0197697	0.0274638	0.0252508	0.0353015	0.0218633	0.0741391	0.0653379	0.0563532
CDIF630erm_02241	clpB	chaperone protein	0.0328025	0.0272699	0.0362783	0.0477455	0.0338497	0.0475303	0.0127617	0.0151784	0.0133542	0.174726	0.193492	0.155886	0.00409881	0.00474144	0.00580942
CDIF630erm_02248		N-carbamoyl-L-amino acid hydrolase	0.00532977	0.0066182	0.00452835	0.00618253	0.0120648	0.00737611	0.0101167	0.00980411	0.00809936	0.0162486	0.00930203	0.0164673	0.00397476	0.00469727	0.0018835
CDIF630erm_02276	lysC	aspartokinase	0.00567978	0.00434987	0.00386848	0.00920721	0.00401755	0.00382911	0.00559994	0.00584569	0.0049743	0.00445653	0.00566358	0.00316953	0.00549528	0.00575713	0.00839936
CDIF630erm_02279		putative membrane protein	0.00801575	0.00803335	0.00590937	0.00520232	0.00644309	0.00939001	0.00729925	0.0114301	0.00892278	0.00550104	0.00432741	0.00724142	0.00704713	0.00571912	0.00540293
CDIF630erm_02281		hypothetical protein	0.00197527	0.00243442	0.00162996	0.00191805	0.00188002	0.00271291	0.00186281	0.0031766	0.00120772	0.00174644	0.00401854	0.00476848	0.0027219	0.00297043	0.00199147
CDIF630erm_02282	glnS	glutamine--tRNA ligase	0.0229576	0.0215857	0.0228124	0.0327449	0.0225294	0.0178418	0.0150672	0.0229009	0.0222237	0.0248182	0.0276357	0.0227643	0.0238096	0.0189987	0.0244825
CDIF630erm_02284		LUD domain protein	0.00825477	0.0149012	0.0124777	0.00546564	0.00810381	0.00871497	0.0127638	0.0108974	0.0155625	0.0118484	0.00660178	0.0129078	0.00756614	0.00699456	0.00693952
CDIF630erm_02285		hypothetical protein	0.00120952	0.00244501	0.00343112	0.00224226	0.00182184	0.00239611	0.00191554	0.00285803	0.00241095	0.00260384	0.00191547	0.00118144	0.00256584	0.00268867	0.00183759
CDIF630erm_02291		ABC-type transport system, ATP-binding protein	0.0256661	0.0224845	0.0206293	0.0287348	0.0189056	0.0180668	0.0139736	0.0257661	0.0185691	0.0187169	0.0260766	0.0203595	0.0284339	0.0237566	0.0228046
CDIF630erm_02292		putative molybdopterin cofactor biosynthesis protein	0.0026273	0.00282643	0.00205651	0.00555101	0.00248964	0.00112982	0.00357557	0.00274698	0.00416112	0.00330324	0.00275521	0.00329723	0.00253514	0.00457394	0.00303452
CDIF630erm_02322	xdhA4	xanthine dehydrogenase, molybdenum binding subunit	0.00593848	0.00410864	0.0110294	0.00606238	0.00480334	0.00563412	0.00365567	0.00528431	0.0054032	0.00497832	0.00420407	0.00679251	0.00555479	0.00553232	0.00529233
CDIF630erm_02323	xdhC3	xanthine dehydrogenase, iron-sulfur binding subunit	0.00730958	0.00631221	0.00389084	0.00531133	0.0042669	0.00482489	0.00318904	0.00327461	0.00559368	0.00433892	0.00560627	0.00448919	0.00884442	0.0054027	0.00714536
CDIF630erm_02324	xdhB3	xanthine dehydrogenase, FAD-binding subunit	0.00392518	0.00333818	0.00354049	0.00432929	0.00377003	0.00183024	0.00233696	0.00677081	0.00425923	0.00152906	0.00298621	0.00378442	0.00304123	0.00296732	0.0038112
CDIF630erm_02330		putative ATP-dependent RNA helicase	0.00199377	0.00153829	0.00235917	0.00243812	0.00354919	0.0033606	0.013884	0.00175567	0.00188347	0.00393122	0.00202493	0.00188337	0.00309758	0.00205045	0.00161708
CDIF630erm_02343	bipA	GTP-binding protein BipA	0.0120023	0.0117555	0.0110548	0.0302672	0.00931423	0.0190951	0.0120363	0.0110612	0.0204027	0.0118138	0.00913353	0.0142384	0.0267621	0.021032	0.0121866
CDIF630erm_02344	trxB2	thioredoxin reductase	0.00227421	0.00334578	0.00416469	0.00136338	0.0015657	0.000791092	0.0021496	0.00267289	0.00311742	0.00226395	0.00276504	0.00336672	0.00184164	0.00233951	0.00152666
CDIF630erm_02347	thrC	threonine synthase	0.00832899	0.00622499	0.00521281	0.0073615	0.00702492	0.00698661	0.00808623	0.00979055	0.00774871	0.00577238	0.00853067	0.00644957	0.00617455	0.00714162	0.00706737
CDIF630erm_02348	thrB	homoserine kinase	0.00962104	0.00344	0.00716611	0.00371764	0.0073128	0.00861788	0.00752976	0.00750343	0.00936061	0.00479428	0.0056533	0.00762553	0.00939479	0.00588517	0.00864258
CDIF630erm_02349		uncharacterized protein, aldolase-type	0.00431867	0.00514602	0.00549791	0.00725593	0.00457798	0.0052694	0.00479693	0.00524348	0.00335204	0.00560149	0.00656238	0.00290721	0.00542725	0.00526389	0.00703436
CDIF630erm_02359	ispG	4-hydroxy-3-methylbut-2-en-1-yl diphosphate synthase	0.0052335	0.00301117	0.00318628	0.00298766	0.0022288	0.00233425	0.00286204	0.00311081	0.0027258	0.00236467	0.00315772	0.00295154	0.00346177	0.00367979	0.00373162
CDIF630erm_02366	uppS1	undecaprenyl pyrophosphate synthetase	0.00130812	0.00124095	0.00224739	0.0188968	0.0167384	0.0049961	0.00863777	0.00244873	0.00203243	0.0187575	0.00292621	0.00555565	0.00417354	0.00410738	0.00347443
CDIF630erm_02368	rrf	ribosome-recycling factor	0.0624694	0.0547707	0.0549395	0.0712282	0.0573812	0.0562757	0.0653572	0.0571359	0.0682792	0.0641181	0.0682463	0.0590411	0.0655846	0.0600284	0.0787865
CDIF630erm_02369	pyrH	uridylate kinase	0.0156077	0.0224319	0.0223015	0.0328663	0.0161794	0.013692	0.0137736	0.0189911	0.0168681	0.0182327	0.0144861	0.0179084	0.0162653	0.0149468	0.015666
CDIF630erm_02370	tsf	elongation factor ts (EF-ts)	0.12279	0.113607	0.109913	0.134516	0.119696	0.131465	0.109175	0.163441	0.110448	0.0948179	0.0950039	0.11379	0.152412	0.140069	0.156374
CDIF630erm_02371	rpsB	30S ribosomal protein S2	0.181153	0.187698	0.194295	0.169194	0.174891	0.17721	0.180576	0.158843	0.16378	0.163951	0.151873	0.143428	0.1512	0.178019	0.191205
CDIF630erm_02379		putative vancomycin resistance protein, vanW family	0.00234262	0.00231156	0.00378817	0.00112632	0.00318154	0.00229501	0.00240867	0.00680314	0.00234774	0.000757785	0.00164159	0.0019448	0.00135507	0.00370671	0.00484828
CDIF630erm_02383		deblocking aminopeptidase	0.0229586	0.00398496	0.01117	0.0234762	0.00530967	0.00507022	0.018038	0.0199259	0.00298995	0.00937198	0.0153121	0.00899778	0.0138467	0.0138076	0.0176421
CDIF630erm_02385		putative ATP / GTP-binding protein	0.00526932	0.00326251	0.0039639	0.00364839	0.00320025	0.00275594	0.00451948	0.00348506	0.00245683	0.00322813	0.00395112	0.00247368	0.00459825	0.00348673	0.00257214
CDIF630erm_02387	thiH2	2-iminoacetate synthase	0.0216366	0.0179409	0.0177887	0.0135947	0.0321431	0.0187559	0.0314595	0.0375328	0.0323113	0.0195294	0.0173086	0.0230812	0.0139258	0.0127813	0.0134922
CDIF630erm_02389		isoleucine 2-epimerase	0.0234419	0.0180525	0.0212497	0.0475132	0.0200055	0.0194729	0.0113436	0.0160575	0.0127533	0.0102573	0.0150121	0.00978211	0.00769299	0.00793382	0.00811901
CDIF630erm_02394		putative threonyl / alanyl-tRNA synthetase	0.00118713	0.00404693	0.00689613	0.00111636	0.0013451	0.00187296	0.0021695	0.00242792	0.00290634	0.00112161	0.00695492	0.000901932	0.00180141	0.00392653	0.00173266
CDIF630erm_02400	hcp	hydroxylamine reductase	0.0136447	0.0091346	0.0126654	0.0083169	0.00935309	0.00766465	0.00950294	0.0105394	0.0125699	0.00650708	0.00970445	0.0107869	0.00995181	0.00932623	0.0100104
CDIF630erm_02401		putative iron-sulfur binding protein	0.0049872	0.00265712	0.00118422	0.00339901	0.00371114	0.0601698	0.00337201	0.00202276	0.0191956	0.0519481	0.0145551	0.00621258	0.00197629	0.000614915	0.00222277
CDIF630erm_02406		ABC-type transport system, cystine / aminoacid-family extracellular solute-binding protein	0.0164784	0.0201583	0.0214285	0.00870763	0.0145963	0.0208797	0.0187683	0.0223839	0.0293223	0.0183414	0.0131723	0.0181583	0.0206621	0.0164178	0.0167099
CDIF630erm_02409		ABC-type transport system, cystine / aminoacid-family extracellular solute-binding protein	0.0279163	0.0306852	0.0340424	0.0489985	0.0360411	0.0365439	0.033304	0.0349022	0.0346238	0.0369551	0.0353783	0.032455	0.0320517	0.036869	0.0383359
CDIF630erm_02411		putative molybdopterin oxidoreductase	0.00254525	0.00253912	0.00363603	0.00134477	0.00345733	0.00325701	0.00269297	0.00326827	0.00237587	0.00344703	0.00324562	0.00392909	0.00325922	0.00345884	0.00623733
CDIF630erm_02413		putative alpha / beta hydrolase	0.0164895	0.0143343	0.0122967	0.00160368	0.0145832	0.0149114	0.0134879	0.00996069	0.01518	0.0118115	0.0121287	0.0123469	0.0189989	0.0183141	0.0204307
CDIF630erm_02425		cell wall hydrolase	0.0165828	0.0105758	0.0115733	0.00954286	0.0108466	0.00812546	0.0105956	0.0125241	0.0111431	0.00817832	0.01177	0.0089495	0.0123447	0.0132697	0.00933734
CDIF630erm_02427	ftnA	bacterial non-heme ferritin	0.0219882	0.0191961	0.0245074	0.00967475	0.0167718	0.0200618	0.0190944	0.0201968	0.0280917	0.0149438	0.0170058	0.0198811	0.031315	0.0261727	0.0298242
CDIF630erm_02433	hisC2	histidinol-phosphate aminotransferase	0.000753597	0.00115968	0.000649162	0.00357252	0.00789044	0.00146566	0.000300142	0.000431103	0.000501823	0.0121178	0.000305544	0.000350974	0.00157681	0.000860393	0.000963218
CDIF630erm_02443		ABC-type transport system, multidrug-family ATP-binding / permease	0.00441388	0.00273826	0.00422351	0.0176356	0.0113419	0.0078027	0.00333939	0.0064569	0.00314915	0.00810082	0.00940252	0.00959108	0.00215785	0.00147818	0.00124807
CDIF630erm_02444		ABC-type transport system, multidrug-family ATP-binding / permease	0.00434795	0.00465391	0.00460415	0.0304085	0.0104865	0.00788287	0.00288233	0.00390775	0.0036676	0.00663404	0.00897457	0.00872606	0.000885052	0.00249261	0.00101428
CDIF630erm_02446	cynT	carbonic anhydrase	0.0027465	0.00295741	0.0032075	0.00501485	0.00370109	0.00180732	0.00434192	0.00494532	0.00461679	0.00391941	0.00359296	0.00423431	0.00333609	0.00250616	0.00398318
CDIF630erm_02460		putative radical SAM superfamily lipoprotein	0.00711528	0.00977365	0.00547578	0.00561107	0.00583832	0.00467083	0.00571662	0.00552374	0.00686279	0.00371403	0.00435976	0.00533838	0.005229	0.00399628	0.00394402
CDIF630erm_02478	asnC	asparagine--tRNA ligase	0.0173379	0.0235538	0.0235563	0.0344586	0.0251316	0.0175465	0.0218452	0.0234103	0.0233253	0.012689	0.0223365	0.0239422	0.0183762	0.0155612	0.0166377
CDIF630erm_02484		putative ATPase	0.00557035	0.00308384	0.00334764	0.00359762	0.00329213	0.0229476	0.00498086	0.00351353	0.00570495	0.010777	0.00220996	0.0100064	0.00273935	0.00150999	0.00349472
CDIF630erm_02487	eam	glutamate 2,3-aminomutase	0.0127049	0.01107	0.00870884	0.0180423	0.010662	0.00837522	0.00711523	0.0106755	0.00700507	0.0155075	0.0116606	0.0151049	0.00641676	0.00707928	0.00557776
CDIF630erm_02495	ampP	xaa-pro aminopeptidase	0.0122556	0.0117591	0.0117435	0.00724125	0.0116713	0.0118096	0.011829	0.00892434	0.0130579	0.0127568	0.0130154	0.013807	0.0157067	0.0143196	0.0116391
CDIF630erm_02497	prsA1	peptidyl-prolyl cis-trans isomerase, PpiC-type	0.0411068	0.0369286	0.0407904	0.0367584	0.029687	0.0405405	0.0317989	0.0271494	0.0346777	0.0372628	0.0395002	0.0310753	0.0429693	0.040957	0.0442475
CDIF630erm_02503	fruABC	PTS system, fructose-specific IIABC component	0.0419755	0.0463775	0.0471775	0.0301995	0.038383	0.0461369	0.0489006	0.0430734	0.0494601	0.0421307	0.0337653	0.0336577	0.0456918	0.046397	0.0294016
CDIF630erm_02504	fruK	fructose 1-phosphate kinase	0.0432375	0.0336484	0.0329327	0.0473454	0.0323645	0.0308808	0.0293468	0.0335725	0.0353811	0.029864	0.0258198	0.0243325	0.0347618	0.0336489	0.0192652
CDIF630erm_02556	algC	putative phosphomannomutase / phosphoglucomutase	0.0228848	0.0187759	0.0195806	0.0172205	0.0238231	0.0173886	0.0185315	0.0274129	0.0251541	0.0185675	0.024075	0.0228439	0.0186024	0.0160639	0.00921711
CDIF630erm_02558	rpiB1	ribose-5-phosphate isomerase	0.0233194	0.0218814	0.0210702	0.0136696	0.0208248	0.0195539	0.0298628	0.0269452	0.0301275	0.0237416	0.0243768	0.020734	0.0190684	0.0206467	0.00825933
CDIF630erm_02559	tkt*1	transketolase, C-terminal section	0.107526	0.108138	0.114366	0.183448	0.112019	0.0894788	0.105992	0.12022	0.101227	0.126256	0.149203	0.110268	0.112922	0.11971	0.040869
CDIF630erm_02560	tkt1	transketolase, N-terminal section	0.0749233	0.0536178	0.0596005	0.0546151	0.0583914	0.0622794	0.0549069	0.0572027	0.0601629	0.0601394	0.0649096	0.0594096	0.0742051	0.074069	0.0346619
CDIF630erm_02567	tal2	transaldolase	0.0347759	0.0348426	0.0326008	0.0594741	0.033384	0.0315698	0.0326904	0.0345866	0.0328625	0.030381	0.0299426	0.02823	0.0456876	0.0444578	0.0239909
CDIF630erm_02568	xpt	xanthine phosphoribosyltransferase	0.0162357	0.0101286	0.00969902	0.0145834	0.0109819	0.0167944	0.0111129	0.0132415	0.0138576	0.0059478	0.011014	0.0117741	0.0241958	0.0157561	0.00846485
CDIF630erm_02574	guaB	IMP dehydrogenase	0.0473165	0.0500689	0.0507981	0.0955186	0.0538323	0.0541248	0.051012	0.0625023	0.0567924	0.0410965	0.0475102	0.0530895	0.0662262	0.044409	0.031756
CDIF630erm_02575		putative toxic anion resistance protein	0.00206264	0.0014188	0.000696798	0.0010521	0.00131739	0.0025762	0.00217718	0.00510701	0.00142336	0.00165779	0.00119235	0.00335881	0.00159351	0.00165476	0.00843035
CDIF630erm_02577	gbd	NAD-dependent 4-hydroxybutyrate dehydrogenase	0.00386216	0.00414243	0.00198278	0.0115032	0.00601072	0.00532864	0.00781511	0.00643592	0.00697893	0.00373738	0.00446756	0.00675927	0.00531456	0.00501108	0.00374761
CDIF630erm_02578	cat2	4-hydroxybutyryl-CoA:coenzyme A transferase	0.00253323	0.00259188	0.00172523	0.00302742	0.00287617	0.00282364	0.00233969	0.00171872	0.00413697	0.00219343	0.00222096	0.00387489	0.00364458	0.00602027	0.0037007
CDIF630erm_02580	abfD	bifunctional 4-hydroxybutyryl-CoA dehydratase / vinylacetyl-CoA-delta-isomerase	0.00708249	0.00727154	0.00493229	0.00354865	0.00984102	0.00775445	0.00842459	0.00763574	0.0052457	0.0114072	0.00653689	0.00606753	0.00743051	0.0142502	0.0105182
CDIF630erm_02581	sucD	succinate-semialdehyde dehydrogenase (acetylating)	0.00916628	0.00697513	0.00610607	0.00923783	0.0130569	0.00977684	0.00630606	0.00725163	0.00884145	0.00741285	0.0117957	0.0107364	0.00881302	0.0161627	0.00800475
CDIF630erm_02586	pepQ1	xaa-pro dipeptidase	0.00323359	0.00344957	0.00392678	0.00200148	0.00165694	0.00200721	0.00305811	0.00300915	0.00196456	0.00167661	0.00129603	0.0026811	0.00100481	0.00192418	0.0010258
CDIF630erm_02601		ABC-type transport system, nitrate / sulfonate / taurine ATP-binding protein	0.00425493	0.00651358	0.0028504	0.00149255	0.0041794	0.00277906	0.00399811	0.00337844	0.00422188	0.00244848	0.00267102	0.00301136	0.00165633	0.00426844	0.00568825
CDIF630erm_02605		ABC-type transport system, nitrate / sulfonate / taurine extracellular solute-binding protein	0.0269701	0.0219271	0.0340249	0.025271	0.0295894	0.0306131	0.0281993	0.0210398	0.0309297	0.0315765	0.0319477	0.032212	0.0186729	0.0376868	0.0216156
CDIF630erm_02609		DsrEFH-like protein	0.0331055	0.0329944	0.0193985	0.0236043	0.0282308	0.0214042	0.0496071	0.0472102	0.0698251	0.0320306	0.00698943	0.0441889	0.0104498	0.0222461	0.0125164
CDIF630erm_02619		indole-3-acetate kinase	0.00350676	0.0041781	0.00306983	0.00288393	0.0039221	0.00259633	0.0039522	0.00584704	0.00393256	0.00367043	0.00311697	0.0037103	0.00492869	0.00444047	0.00137819
CDIF630erm_02621	iorA	indolepyruvate oxidoreductase, sununit alpha	0.00275852	0.00189622	0.00283898	0.00179309	0.00250961	0.00143169	0.00164273	0.00274023	0.00323869	0.00287389	0.00325312	0.00361841	0.00231079	0.00236503	0.00302136
CDIF630erm_02631		transcriptional regulator, beta-lactams repressor	0.00208247	0.00261231	0.00248369	0.00180686	0.001376	0.00122566	0.00292808	0.00217969	0.00185594	0.000992945	0.000641332	0.00119975	0.00162877	0.0015482	0.0015823
CDIF630erm_02638		uncharacterized protein	0.00397112	0.00318753	0.00247734	0.0114181	0.00319015	0.00402079	0.00405895	0.00574501	0.004739	0.00676518	0.00565347	0.00389651	0.00303383	0.00531165	0.00334554
CDIF630erm_02652	ppdK	pyruvate phosphate dikinase	0.0163775	0.0159701	0.015009	0.00911171	0.0134731	0.0104785	0.0133029	0.0143932	0.0148614	0.0129428	0.0151547	0.00943563	0.0117217	0.00798509	0.0117727
CDIF630erm_02653		pyruvate, phosphate dikinase regulatory protein	0.00468824	0.00480695	0.00345399	0.00853396	0.0032573	0.0026257	0.00441877	0.00287508	0.00505739	0.00322665	0.00573202	0.00316313	0.00504668	0.00200639	0.00312908
CDIF630erm_02675	glyS	glycine--tRNA ligase, beta subunit	0.0312548	0.0362604	0.0334357	0.0284521	0.0343107	0.0296209	0.0258541	0.0308135	0.0286028	0.0289895	0.0346008	0.0299982	0.0183309	0.0187891	0.0129277
CDIF630erm_02676	glyQ	glycine--tRNA ligase, alpha subunit	0.0305935	0.0343772	0.0291939	0.0275698	0.0319274	0.0297327	0.0305106	0.0321808	0.0360319	0.0359775	0.03954	0.0288676	0.0147892	0.0165264	0.0177413
CDIF630erm_02677		uncharacterized protein	0.0158149	0.0175204	0.0207438	0.0312723	0.017513	0.0152705	0.01717	0.0300376	0.0158444	0.0231208	0.0166679	0.0135418	0.0114777	0.0111388	0.0101981
CDIF630erm_02681	era	GTP-binding protein Era	0.0041644	0.00460233	0.00795261	0.00652935	0.00600813	0.0040808	0.00482287	0.00513825	0.00534709	0.00505072	0.00708846	0.00469403	0.00480469	0.004522	0.00553893
CDIF630erm_02685		PhoH-like protein	0.00124992	0.00171083	0.00163465	0.00208344	0.00100431	0.00171589	0.0018082	0.00137249	0.00178592	0.00315263	0.00194731	0.00144211	0.00625141	0.00184964	0.00767172
CDIF630erm_02688		putative ribosome-associated sigma 54 modulation protein	0.0357635	0.0484575	0.0533177	0.0219257	0.0159545	0.0349016	0.0219444	0.0307149	0.0237762	0.030395	0.0200203	0.0317221	0.00910218	0.00925326	0.0094206
CDIF630erm_02690		putative aspartyl / glutamyl-tRNA amidotransferase subunit B-related	0.0320472	0.0316481	0.0419198	0.0348168	0.038875	0.0421223	0.0353375	0.0455689	0.0503316	0.0399334	0.0415184	0.0451459	0.020847	0.020937	0.0239905
CDIF630erm_02691	rpsU	30S ribosomal protein S21	0.117515	0.0877721	0.0933524	0.0776804	0.123083	0.0831664	0.105317	0.111833	0.0753121	0.0921716	0.11085	0.0897854	0.0495092	0.0494173	0.0393041
CDIF630erm_02692		putative histidine triad (HIT) protein	0.0256259	0.0287477	0.0246352	0.0734173	0.0282033	0.0182498	0.0207588	0.0268041	0.0171513	0.01462	0.0239422	0.0111205	0.0143856	0.0162636	0.0107654
CDIF630erm_02694	rsmE	ribosomal RNA small subunit methyltransferase E	0.00214282	0.00132599	0.0013773	0.00147423	0.00357999	0.000885197	0.000978996	0.000109838	0.00108285	0.000807229	0.000696182	0.00132528	0.00104584	0.00131933	0.00131777
CDIF630erm_02698		putative CRISPR-associated negative autoregulator	0.00228069	0.0036853	0.00189879	0.00284528	0.0027543	0.00244141	0.00104473	0.00297873	0.00291146	0.000908473	0.00223041	0.0023117	0.00631224	0.00614619	0.00482508
CDIF630erm_02702		ABC-type transport system, sugar-family ATP-binding protein	0.00627188	0.00657459	0.00451515	0.00589955	0.00549009	0.00523512	0.00408086	0.00499442	0.00593853	0.00640206	0.00636234	0.00761308	0.00373021	0.00423623	0.00561945
CDIF630erm_02705	glcK	glucokinase	0.00468405	0.00577213	0.00280867	0.00603296	0.00373722	0.00341641	0.00377388	0.00368949	0.0038252	0.0033272	0.00462573	0.00236551	0.00253733	0.00501697	0.0049258
CDIF630erm_02706	dnaJ	chaperone protein DnaJ	0.0154679	0.0183143	0.0180139	0.0109567	0.0165997	0.017244	0.0164569	0.013981	0.0179197	0.0331207	0.0228332	0.0295996	0.00616371	0.00536593	0.00769935
CDIF630erm_02707	dnaK	chaperone protein DnaK	0.168763	0.169903	0.172447	0.203341	0.189294	0.236544	0.138521	0.125341	0.133401	0.304305	0.271619	0.246164	0.0510111	0.0530436	0.0557823
CDIF630erm_02708	grpE	protein grpE (HSP-70 cofactor)	0.0393613	0.047503	0.04221	0.052034	0.0613813	0.0453535	0.0405715	0.0452627	0.0422756	0.0839002	0.0867407	0.0926033	0.0185107	0.0158594	0.0125602
CDIF630erm_02713	lepA	elongation factor 4	0.00719259	0.00716409	0.00635687	0.00689461	0.00972576	0.00905199	0.00998135	0.00902962	0.00968289	0.00658704	0.00764377	0.00804935	0.00587085	0.00488246	0.00595941
CDIF630erm_02719	rpsT	30S ribosomal protein S20	0.0508295	0.0589501	0.0651139	0.0474936	0.0466372	0.0628598	0.0680339	0.0471364	0.0482105	0.0684154	0.0400994	0.0553655	0.018907	0.030239	0.0513676
CDIF630erm_02728	ung	uracil-DNA glycosylase (UDG)	0.00673619	0.00647142	0.00698211	0.00569299	0.00769985	0.00639229	0.00782153	0.00841943	0.008903	0.00661324	0.00414863	0.00917607	0.00289507	0.00270068	0.00359196
CDIF630erm_02742	selA	L-seryl-tRNA(Sec) selenium transferase	0.00210884	0.0035702	0.00353929	0.00460853	0.00413161	0.00308468	0.00462454	0.00411903	0.00488536	0.00233878	0.00443994	0.00432982	0.00203683	0.00267084	0.00314895
CDIF630erm_02745	dacF4	serine-type D-ala-D-ala carboxypeptidase	0.00326946	0.00345942	0.0096626	0.00794209	0.00381907	0.00345239	0.00394335	0.00399713	0.00518592	0.00275847	0.00624507	0.00400606	0.00227851	0.00357056	0.00302556
CDIF630erm_02750		putative histidinol-phosphate aminotransferase	0.00859394	0.0114185	0.00696945	0.00806833	0.00626942	0.00485771	0.00759315	0.00597101	0.00662973	0.00570709	0.00501688	0.00493542	0.0050267	0.00765957	0.00245196
CDIF630erm_02762	yjgF	2-iminobutanoate / 2-iminopropanoate deaminase	0.0861763	0.0857948	0.07558	0.0281673	0.0885683	0.0612298	0.0935309	0.127295	0.0848203	0.0794319	0.0672317	0.0693855	0.047821	0.0247627	0.0537088
CDIF630erm_02763	tdcB	threonine dehydratase	0.0689514	0.0654745	0.0707141	0.0525987	0.0601622	0.0473015	0.0652107	0.069642	0.0650744	0.0454708	0.0371639	0.0508355	0.0276697	0.0208949	0.0269641
CDIF630erm_02764	aspD	bifunctional aspartate aminotransferase / L-aspartate beta-decarboxylase	0.00786402	0.00926638	0.0096502	0.00927666	0.00903211	0.00968438	0.013693	0.00796461	0.0130754	0.010004	0.0100814	0.0106606	0.00720249	0.00786988	0.00793334
CDIF630erm_02765	ansB	L-asparaginase	0.00468953	0.00374751	0.0042478	0.00437992	0.00536362	0.00428687	0.0041679	0.00596773	0.00606461	0.00374333	0.00531159	0.00479147	0.0037677	0.00536053	0.00532601
CDIF630erm_02772	leuS	leucine--tRNA ligase	0.0218233	0.0211598	0.0223701	0.0186389	0.0221666	0.0239392	0.0263672	0.0191174	0.0233951	0.026856	0.0294822	0.0285188	0.00670763	0.0127945	0.0533526
CDIF630erm_02774	rsfS	ribosomal silencing factor RsfS	0.0100512	0.0100961	0.00958645	0.0058411	0.00735081	0.00597382	0.00926541	0.00904182	0.0100968	0.00971174	0.0103441	0.00784234	0.00965511	0.00785185	0.00720139
CDIF630erm_02775		putative hydrolase	0.00773819	0.007215	0.0059448	0.00921254	0.00558704	0.00864777	0.0108769	0.00868121	0.0161793	0.00701728	0.00418129	0.00187944	0.00560719	0.00776353	0.00329831
CDIF630erm_02784		putative serine-pyruvate aminotransferase	0.002152	0.0020104	0.00163429	0.00303241	0.00243057	0.00353155	0.00131387	0.00162722	0.00121899	0.00153846	0.00161728	0.00159507	0.00189463	0.000759889	0.00140585
CDIF630erm_02799		hypothetical protein	0.0190742	0.0145807	0.0135172	0.0227093	0.00972584	0.0136241	0.0144035	0.015415	0.0157077	0.0101875	0.0153616	0.0125199	0.0113312	0.00819631	0.00946954
CDIF630erm_02802		ABC-type transport system, sugar-family extracellular solute-binding protein	0.0131614	0.0138911	0.0155086	0.0172776	0.0155127	0.01717	0.01911	0.0123277	0.0151896	0.012368	0.0166703	0.0142645	0.0298432	0.0109142	0.00806528
CDIF630erm_02808		hypothetical protein	0.00716858	0.00775559	0.00628691	0.0026768	0.00709901	0.0059885	0.00669534	0.00658777	0.00664233	0.00722817	0.00591208	0.008755	0.0123693	0.00562196	0.00529131
CDIF630erm_02809	coaD	phosphopantetheine adenylyltransferase	0.00190137	0.00225078	0.00221316	0.00231699	0.00359496	0.00254309	0.00304221	0.00150181	0.00283264	0.00159873	0.00301376	0.00151281	0.00876883	0.00184357	0.00744462
CDIF630erm_02812	yloV	uncharacterized protein YloV	0.0116157	0.0119347	0.0160499	0.00936628	0.0313332	0.0261152	0.0126523	0.0116442	0.0138901	0.00968482	0.00988049	0.0126998	0.00876576	0.00716003	0.0271581
CDIF630erm_02813	yloU	uncharacterized protein YloU	0.00646158	0.00782546	0.00826897	0.00685378	0.0044327	0.00790781	0.00586413	0.00723313	0.0104631	0.00714313	0.00916318	0.00610155	0.00432862	0.00480656	0.00436151
CDIF630erm_02825		putative nitroreductase-like oxidoreductase	0.00787196	0.0112849	0.0113411	0.00279205	0.00623289	0.00977621	0.00729737	0.01037	0.00913923	0.00941974	0.00939988	0.00944903	0.00530609	0.00525497	0.00682515
CDIF630erm_02826		putative phosphoglycolate phosphatase	0.00493823	0.00367088	0.00536845	0.00308935	0.0023766	0.00420199	0.00404571	0.00422981	0.00245238	0.00289447	0.00301922	0.00301766	0.0028984	0.00288489	0.00644012
CDIF630erm_02828	rpe2	ribulose-phosphate 3-epimerase	0.0128967	0.00604225	0.00809063	0.0402709	0.0184981	0.00920345	0.00790131	0.00879684	0.00994881	0.0100471	0.0139749	0.0142258	0.00641285	0.00745876	0.00648085
CDIF630erm_02831	stk	putative serine / threonine-protein kinase	0.0037095	0.00509009	0.00493212	0.00773896	0.00630499	0.00477216	0.00721272	0.00704759	0.00448661	0.00284691	0.00517847	0.00678436	0.00737	0.00310944	0.00347746
CDIF630erm_02837	fmt	methionyl-tRNA formyltransferase	0.00318032	0.00381833	0.00316203	0.00571613	0.0048724	0.00258458	0.00297233	0.00429474	0.00395831	0.00411868	0.00603514	0.0036217	0.00419398	0.00367979	0.0034925
CDIF630erm_02840	coaBC	bifunctional phosphopantothenoylcysteine synthetase / decarboxylase	0.00879256	0.00695524	0.00548942	0.00248486	0.00659209	0.00864566	0.00636951	0.00852114	0.00671227	0.00473403	0.00518239	0.00579789	0.014978	0.00601336	0.00768404
CDIF630erm_02841	rpoZ	DNA-directed RNA polymerase subunit omega	0.0110132	0.0109778	0.0129106	0.00517805	0.0086277	0.00979661	0.0154901	0.0124278	0.00935669	0.0150542	0.00891602	0.0122926	0.00600869	0.00428595	0.0101378
CDIF630erm_02842	gmk	guanylate kinase	0.00536596	0.00449674	0.00516633	0.00290907	0.00467996	0.00313698	0.00528763	0.00543759	0.00587686	0.00401253	0.00578511	0.00481609	0.00266772	0.00411261	0.00359831
CDIF630erm_02843		uncharacterized protein, YicC-like	0.0165388	0.00448523	0.0116435	0.00416015	0.0244681	0.00407294	0.0271094	0.0192733	0.0061117	0.0236909	0.0342598	0.0190403	0.00455282	0.00980719	0.00367914
CDIF630erm_02844	dapF	diaminopimelate epimerase	0.00390557	0.00433804	0.00220265	0.00634097	0.00299334	0.0026966	0.00375684	0.0022359	0.00405577	0.00242245	0.003528	0.00344511	0.00248943	0.00205864	0.044715
CDIF630erm_02845	ltaE	low specificity L-threonine aldolase	0.0070038	0.00682742	0.00992213	0.00937525	0.00980715	0.00364244	0.00815974	0.0111152	0.00995457	0.00357619	0.00493569	0.00508908	0.00740328	0.00983392	0.00357905
CDIF630erm_02846	yloA	uncharacterized protein YloA	0.00144573	0.00142629	0.00221438	0.00160709	0.00102498	0.00155065	0.00122414	0.000896174	0.00128744	0.0037889	0.00222612	0.00074611	0.00114158	0.00224301	0.00158502
CDIF630erm_02862	trpS	tryptophan--tRNA ligase	0.00884786	0.00721397	0.0113909	0.0109886	0.0115134	0.00719389	0.00907857	0.011577	0.0102681	0.00690466	0.00922272	0.00780403	0.00648967	0.00489113	0.00516963
CDIF630erm_02865		putative amino acid permease	0.00480181	0.00446345	0.00354338	0.00402952	0.00386856	0.00542054	0.00178908	0.00340776	0.00337483	0.00282712	0.0052788	0.00313794	0.00547094	0.00280216	0.00317302
CDIF630erm_02866		putative peptidase, M24 family	0.0568245	0.0471421	0.0564152	0.0753597	0.0521043	0.0546758	0.0432536	0.0593167	0.0530149	0.0589781	0.0694852	0.0524992	0.0231357	0.0257695	0.0172151
CDIF630erm_02871	ileS	isoleucine--tRNA ligase	0.0264916	0.032332	0.0301022	0.025319	0.0313225	0.0267836	0.0354702	0.030392	0.0379064	0.0276031	0.0295321	0.0337282	0.0124616	0.0314422	0.0199091
CDIF630erm_02873		putative cell-division initiation protein DivIVA	0.0154195	0.0179098	0.0158992	0.01296	0.0110717	0.0143548	0.0141023	0.013655	0.0339099	0.0130784	0.0131065	0.0387667	0.0122103	0.00655569	0.0113272
CDIF630erm_02876	sepF	cell division protein SepF	0.00524036	0.00427755	0.00409081	0.00595044	0.00653806	0.00350541	0.00481302	0.00829589	0.00623937	0.00266693	0.00392744	0.00620532	0.00265274	0.00714089	0.00278411
CDIF630erm_02877		putative pyridoxal 5*-phosphate-dependent enzyme	0.0168304	0.0216425	0.0190601	0.00853148	0.0127415	0.012981	0.014651	0.0116626	0.0146643	0.0133917	0.0129886	0.0129205	0.00849059	0.00853409	0.00995117
CDIF630erm_02880		uncharacterized protein	0.0349466	0.0288672	0.0202335	0.0330418	0.0279921	0.0419673	0.0341119	0.0312032	0.0341707	0.0449754	0.0493138	0.0386604	0.0197046	0.0234873	0.00993977
CDIF630erm_02881		ACT domain-containing protein	0.0586345	0.0548991	0.0602223	0.0423494	0.0861176	0.0728888	0.0649758	0.0580041	0.0569291	0.0816838	0.0840396	0.0678574	0.0251862	0.0250925	0.0269856
CDIF630erm_02884	gpsA	glycerol-3-phosphate dehydrogenase [NAD(P)+]	0.00417278	0.00453433	0.00291562	0.0016673	0.00305049	0.0050746	0.00319557	0.0041754	0.00333157	0.00419545	0.0031802	0.00238424	0.00211677	0.00363164	0.00425721
CDIF630erm_02886	der	GTPase Der	0.00955132	0.0109574	0.00987025	0.00804963	0.00555995	0.0126211	0.00652727	0.0103818	0.00759326	0.00835411	0.00678454	0.00738388	0.0216502	0.00515622	0.00555593
CDIF630erm_02893		laccase domain protein	0.0021112	0.00150274	0.0019945	0.0012007	0.00128345	0.00120956	0.00185333	0.00240457	0.00111531	0.00146346	0.00263043	0.00132879	0.00189008	0.00302912	0.00875914
CDIF630erm_02899		ABC-type transport system, sugar-family extracellular solute-binding protein	0.0175863	0.00605501	0.0198128	0.00692119	0.00800387	0.00538657	0.00663483	0.00391696	0.00378538	0.012498	0.0104728	0.00577213	0.00143839	0.0100049	0.0170988
CDIF630erm_02900	ftsZ	cell division protein FtsZ	0.0398509	0.0432936	0.0417514	0.0535083	0.0410033	0.0339116	0.0390573	0.0439565	0.0479589	0.0442839	0.0421167	0.0436428	0.0173402	0.0252651	0.0186902
CDIF630erm_02905	murG	UDP-N-acetylglucosamine--N-acetylmuramyl-(pentapeptide) pyrophosphoryl-undecaprenol N-acetylglucosamine transferase	0.00481407	0.00358926	0.00375311	0.00529363	0.00249905	0.00305666	0.00265261	0.00324853	0.00389093	0.0164411	0.00197312	0.00664616	0.00390986	0.00200943	0.00269077
CDIF630erm_02907	murD	UDP-N-acetylmuramoylalanine--D-glutamate ligase	0.00873141	0.00357018	0.00555477	0.00332142	0.00327767	0.00709456	0.00691912	0.00627418	0.00356807	0.00479754	0.00259137	0.00178098	0.00701869	0.0036174	0.00434317
CDIF630erm_02909	murF	UDP-N-acetylmuramoyl-tripeptide--D-alanyl-D-alanine ligase	0.00428063	0.00412655	0.00362007	0.0063264	0.00228668	0.0030044	0.00307931	0.00463685	0.00393657	0.00375071	0.00383718	0.00251966	0.00314705	0.00336771	0.00312493
CDIF630erm_02915		putative peptidase, M16 family	0.00120056	0.00145317	0.00139912	0.00232855	0.00137382	0.00250574	0.00331592	0.00236457	0.0024352	0.00162064	0.0023804	0.00171047	0.002485	0.00208253	0.00481018
CDIF630erm_02916	ychF	ribosome-binding ATPase YchF	0.0164146	0.0129553	0.0141772	0.0188296	0.0125562	0.0195953	0.0112118	0.0159414	0.0135765	0.0117952	0.00974045	0.0132803	0.0101308	0.00971657	0.00996074
CDIF630erm_02921	ptsG-BC	PTS system, glucose-specific IIBC component	0.0131511	0.0205369	0.0152234	0.00606114	0.013789	0.0148502	0.0395034	0.0407392	0.048692	0.0115305	0.00723035	0.0137048	0.00949736	0.0148789	0.0106514
CDIF630erm_02924	appF	ABC-type transport system, ATP-binding protein, putative oligopeptide transport system	0.00778788	0.00755077	0.00868244	0.00903523	0.00707982	0.00835824	0.00754187	0.00854702	0.00774162	0.00444888	0.00688282	0.00777079	0.0144984	0.00588328	0.00391938
CDIF630erm_02925	appD	ABC-type transport system, ATP-binding protein, putative oligopeptide transport system	0.00382099	0.00566374	0.00447597	0.00158288	0.00465445	0.00523542	0.00408783	0.00443545	0.00725113	0.00513177	0.00414572	0.00567441	0.00530057	0.0342258	0.00507042
CDIF630erm_02926	appA	ABC-type transport system, oligopeptide-family solute-binding protein	0.129744	0.119518	0.148335	0.118463	0.145583	0.148142	0.149689	0.135629	0.150417	0.121695	0.136471	0.145292	0.0699709	0.0510944	0.0572659
CDIF630erm_02936	pfo	pyruvate synthase	0.293582	0.272197	0.269451	0.2958	0.26642	0.237812	0.304899	0.272422	0.246386	0.256624	0.244344	0.281673	0.156095	0.104979	0.138307
CDIF630erm_02937		phosphate acyltransferase	0.0691242	0.0669408	0.0927289	0.130472	0.0859146	0.078888	0.0822519	0.0867592	0.0684806	0.0709458	0.0934303	0.0839001	0.0452253	0.0385372	0.061193
CDIF630erm_02939		putative sporulation stage II, protein E	0.0022489	0.00182082	0.00278683	0.00196736	0.00316028	0.00141608	0.00754869	0.00240874	0.00344971	0.00215203	0.00229277	0.00263614	0.00869409	0.00499363	0.000644266
CDIF630erm_02946	hpt1	hypoxanthine phosphoribosyltransferase	0.00369254	0.00323821	0.00423726	0.00412587	0.00295867	0.00207714	0.00391036	0.00304768	0.00240255	0.00398211	0.00371867	0.00270161	0.00554629	0.0109142	0.0340076
CDIF630erm_02950	asnA	aspartate--ammonia ligase	0.010665	0.0112693	0.0110458	0.0244794	0.0164835	0.0185501	0.0112599	0.0137005	0.0116915	0.0142056	0.0131434	0.0153034	0.00652428	0.0069273	0.00748455
CDIF630erm_02957		putative lipoprotein	0.00530371	0.00424997	0.00587099	0.00227409	0.00643782	0.00508485	0.00284323	0.00563796	0.0058335	0.00351881	0.0038748	0.00382975	0.0045486	0.00307194	0.00266946
CDIF630erm_02962		putative adenosine-derivate deaminase	0.011844	0.00947643	0.0109131	0.00632622	0.0113872	0.00918667	0.0103031	0.00972892	0.0131471	0.00982481	0.010529	0.00879212	0.0144081	0.00595183	0.00511875
CDIF630erm_02963		HIRAN domain protein	0.00565219	0.0197226	0.0690926	0.0066068	0.0147119	0.0575918	0.0172027	0.0155614	0.00849753	0.0116392	0.00399739	0.0331506	0.00207823	0.0289783	0.00575823
CDIF630erm_02970	cwp22	putative cell wall protein cwp22	0.0130466	0.0199438	0.018642	0.0134194	0.0141383	0.0174369	0.0162859	0.0156929	0.0164114	0.018467	0.0158046	0.0201702	0.00816147	0.00771827	0.00712606
CDIF630erm_02971	galE	UDP-glucose 4-epimerase	0.0125596	0.0102106	0.0099583	0.00901868	0.00772765	0.0116754	0.00907474	0.00989296	0.010733	0.00785571	0.0105453	0.0105325	0.00657351	0.00613299	0.0074632
CDIF630erm_02972	gtaB1	UTP--glucose-1-phosphate uridylyltransferase	0.00929798	0.00916378	0.00961966	0.0156044	0.00866729	0.00986851	0.00664996	0.0101701	0.00902727	0.00866141	0.0123093	0.00843714	0.005729	0.0198869	0.00514772
CDIF630erm_02974		hypothetical protein	0.00344806	0.0070299	0.00738306	0.0055803	0.00521238	0.00969717	0.00447015	0.0153054	0.00536926	0.00277515	0.00436509	0.00731952	0.0030606	0.0038644	0.00342098
CDIF630erm_02975		putative sporulation protein	0.00292741	0.00422548	0.0053599	0.00415297	0.003784	0.00527316	0.00502649	0.00440855	0.0039987	0.0032193	0.00748658	0.00930792	0.00316654	0.00264052	0.00392275
CDIF630erm_02988	glyA1	serine hydroxymethyltransferase	0.0455417	0.035901	0.0408874	0.0994191	0.0726811	0.061357	0.0738498	0.107661	0.0788027	0.0637802	0.0788706	0.0598938	0.0277389	0.0246866	0.0273645
CDIF630erm_02998	cwp14	putative cell wall-binding protein cwp14	0.00315851	0.00249102	0.00302695	0.00463809	0.00331943	0.00202488	0.00352762	0.00453985	0.003899	0.00176127	0.00545161	0.00302031	0.0034032	0.00204776	0.00255686
CDIF630erm_03000		putative beta-ureidopropionase	0.00573425	0.00338364	0.0054045	0.00211838	0.00419286	0.00495557	0.00600691	0.00704032	0.00717258	0.00584985	0.00589013	0.00587764	0.00442595	0.0166003	0.00744169
CDIF630erm_03002	aspS	aspartate--tRNA ligase	0.0206655	0.0181327	0.022837	0.0277377	0.0186831	0.0180696	0.0222223	0.0202296	0.0209323	0.0143633	0.0176072	0.0219744	0.0143327	0.0106111	0.0123069
CDIF630erm_03003	hisS	histidine--tRNA ligase	0.0138623	0.0156417	0.0132558	0.0138028	0.0112502	0.0116295	0.0171992	0.0156053	0.0140541	0.0113673	0.0108923	0.0118553	0.00875533	0.0135909	0.0207326
CDIF630erm_03005		putative hydrolase beta-lactamase-like	0.027154	0.0231935	0.0244201	0.0225857	0.0214295	0.0177154	0.0262789	0.0226604	0.0262494	0.0227418	0.0279191	0.0206128	0.016972	0.0165636	0.0100849
CDIF630erm_03006	dtd	D-tyrosyl-tRNA(Tyr) deacylase	0.00762959	0.00320392	0.00841266	0.00400754	0.00680832	0.00443615	0.00825798	0.00728041	0.0081295	0.00584499	0.00680294	0.00749131	0.0056893	0.00564502	0.00389243
CDIF630erm_03008	apt	adenine phosphoribosyltransferase	0.00910485	0.00811054	0.00767919	0.00545553	0.0108147	0.0066312	0.00811664	0.0109671	0.0116659	0.00447934	0.00601162	0.0104546	0.00571058	0.00888397	0.00389427
CDIF630erm_03012		radical SAM maturase	0.00715916	0.00590587	0.00641791	0.00349556	0.00579796	0.00483908	0.00631288	0.00636242	0.0048845	0.00581853	0.00468402	0.00620539	0.00533252	0.0035126	0.00557589
CDIF630erm_03014		hypothetical protein	0.00121451	0.00114143	0.00125802	0.000985287	0.00119397	0.00109085	0.00107586	0.00463937	0.00376069	0.00115166	0.00142151	0.00106015	0.00364495	0.00145912	0.00126238
CDIF630erm_03018	ptsI	phosphoenolpyruvate-protein phosphotransferase	0.0591989	0.0661919	0.0565632	0.0743925	0.0581897	0.0537609	0.0686999	0.0637306	0.0781903	0.0726869	0.0523204	0.0581448	0.0258263	0.0188545	0.0160109
CDIF630erm_03029		transcriptional regulator, LytR family	0.00203555	0.00190979	0.00280143	0.00227561	0.00297039	0.00385965	0.00274009	0.00187157	0.00188665	0.00222063	0.00473753	0.00238846	0.00388191	0.00160749	0.00162316
CDIF630erm_03030	cwp19	cell surface protein cwp19	0.0178138	0.0116472	0.0139939	0.022923	0.0120478	0.0104879	0.0122046	0.0119668	0.0132491	0.0111303	0.0149581	0.0104399	0.0106978	0.00756124	0.0130396
CDIF630erm_03034	rkpK	UDP-glucose 6-dehydrogenase	0.00243934	0.00430389	0.00200137	0.0042708	0.00239021	0.00684514	0.00233566	0.00226168	0.00248854	0.00250982	0.00180022	0.00205968	0.00252992	0.00292283	0.00230676
CDIF630erm_03043	pgcA2	phosphoglucomutase	0.00363935	0.00520669	0.00215461	0.00289829	0.00263181	0.00242422	0.00260242	0.00228753	0.00247361	0.00450808	0.00305309	0.00204395	0.00772755	0.00244853	0.0110665
CDIF630erm_03046		putative UDP-N-acetylgalactosamine-undecaprenyl-phosphate N-acetylgalactosaminephosphotransferase	0.00255908	0.00212958	0.00277128	0.00281931	0.00145231	0.00206237	0.00118729	0.00172963	0.00185001	0.000909149	0.000386559	0.00115202	0.00155993	0.00115987	0.0049512
CDIF630erm_03047	cwp6	putative N-acetylmuramoyl-L-alanine amidase	0.0207818	0.0201781	0.0184372	0.0106855	0.0146449	0.0151931	0.0152167	0.0159031	0.0171315	0.0153399	0.0208105	0.0152537	0.0107299	0.0114214	0.0144794
CDIF630erm_03049	cwp5	putative cell surface protein cwp5	0.00714359	0.00465842	0.00411331	0.00364706	0.00222744	0.00247916	0.00571546	0.00356683	0.00387615	0.00413873	0.00305916	0.00209765	0.00148125	0.00203907	0.00824776
CDIF630erm_03050	cwp84	cell surface protein cwp84	0.0349159	0.0241178	0.0282487	0.0159071	0.0227841	0.0250479	0.0271735	0.029669	0.0307866	0.0238506	0.0288693	0.0278009	0.0191119	0.0146187	0.0553406
CDIF630erm_03052	cwp66	cell surface protein cwp66	0.017284	0.01874	0.0219004	0.0271918	0.0176255	0.0195853	0.0210687	0.0337851	0.0212681	0.0191413	0.0199791	0.0202701	0.00941105	0.00801574	0.0107684
CDIF630erm_03053		putative LmbE-like deacetylase	0.00288849	0.0019188	0.00375045	0.0119186	0.00405932	0.00304373	0.00378638	0.00407007	0.00533169	0.00377724	0.00515588	0.00388444	0.00489996	0.00299195	0.00550722
CDIF630erm_03054	cwp2	cell wall binding protein cwp2	0.149103	0.134783	0.125054	0.147052	0.151918	0.151353	0.140511	0.135728	0.13341	0.12009	0.130589	0.118119	0.0625829	0.0675363	0.0640647
CDIF630erm_03055	secA2	protein translocase subunit secA 2	0.00951527	0.0119426	0.0096112	0.00610828	0.00676896	0.00912888	0.00823117	0.00823037	0.0081947	0.0075664	0.00835747	0.00729923	0.0156594	0.0261599	0.00721335
CDIF630erm_03056	slpA	S-layer precursor protein	0.570211	0.682285	0.658955	0.584317	0.694452	0.801294	0.680342	0.651607	0.618889	0.596251	0.685936	0.581646	0.777861	0.31978	0.398762
CDIF630erm_03057	cwp12	cell wall binding protein cwp12	0.00800417	0.00795392	0.00959322	0.0101099	0.010468	0.00828443	0.00903485	0.0072141	0.00850283	0.00872376	0.0116905	0.00883061	0.0122412	0.00717078	0.00824258
CDIF630erm_03058	cwp11	cell wall binding protein cwp11	0.00280731	0.00260004	0.00184054	0.00512804	0.00426292	0.00141368	0.00553419	0.00392539	0.0033747	0.00485924	0.00548974	0.00398962	0.000842352	0.00291255	0.00217048
CDIF630erm_03060		putative calcium-binding adhesion protein	0.0033573	0.00225489	0.0172711	0.00622255	0.00480593	0.0019849	0.00289395	0.00325837	0.00235156	0.00308888	0.00703569	0.00364016	0.001183	0.00757127	0.0116708
CDIF630erm_03062	cwp9	cell wall binding protein cwp9	0.00113036	0.00115534	0.0019053	0.00499426	0.00257772	0.00223744	0.00179462	0.00212191	0.00130137	0.00288985	0.00243143	0.00233922	0.000645568	0.00202252	0.000692466
CDIF630erm_03066		preprotein translocase, yajc subunit	0.00642908	0.00841613	0.00771638	0.00511046	0.0070699	0.0104844	0.00842361	0.0313013	0.00218116	0.00592941	0.008417	0.00682979	0.00564987	0.00695315	0.00726855
CDIF630erm_03067	tgt	queuine tRNA-ribosyltransferase	0.00432207	0.00500295	0.00298178	0.0028062	0.00205662	0.00304213	0.00357254	0.0026627	0.00369425	0.00396207	0.00131989	0.00195142	0.00214343	0.00298616	0.00269806
CDIF630erm_03084		putative amino acid racemase	0.00476165	0.00500761	0.00543509	0.00556201	0.00253675	0.0025774	0.00246657	0.00293503	0.0167245	0.0038999	0.0021068	0.00154705	0.00187176	0.00342637	0.00143543
CDIF630erm_03092	patA	putative N-acetyl-LL-diaminopimelate aminotransferase	0.00697435	0.00435643	0.00667423	0.00284066	0.00325978	0.00278663	0.00227935	0.00392108	0.00400968	0.00164179	0.00105712	0.00176922	0.00284553	0.00412121	0.00352753
CDIF630erm_03107	serS2	serine--tRNA ligase	0.00666201	0.00668952	0.0052211	0.00413492	0.000642203	0.00883107	0.00823482	0.00331193	0.00168942	0.00579881	0.00144754	0.00168956	0.00056149	0.0013016	0.00318737
CDIF630erm_03109	nit	bifunctional nitrilase / nitrile hydratase	0.0135212	0.0134135	0.0129409	0.00940811	0.0085847	0.00788813	0.0118491	0.00992647	0.0112379	0.00872475	0.0083975	0.00713512	0.00843397	0.0357724	0.0062796
CDIF630erm_03110		putative zinc-binding dehydrogenase	0.00815829	0.00661153	0.00794215	0.00995943	0.0118581	0.00849555	0.00688245	0.00995512	0.00763537	0.00958252	0.0154514	0.0106717	0.0180092	0.0135986	0.00495268
CDIF630erm_03113		hypothetical protein	0.000967783	0.00106518	0.00093688	0.00155565	0.00187345	0.00174202	0.000906162	0.000854506	0.00144596	0.00379549	0.00388655	0.00306846	0.00321886	0.000518686	0.00143136
CDIF630erm_03118	dltC	D-alanine--poly(phosphoribitol) ligase subunit 2	0.0174885	0.0198926	0.0216065	0.013694	0.0149639	0.0140355	0.0075345	0.0185924	0.0149256	0.0122161	0.0226686	0.0118773	0.0151514	0.00847351	0.0075785
CDIF630erm_03120	dltA	D-alanine--poly(phosphoribitol) ligase subunit 1	0.00836096	0.0035056	0.00403861	0.00238354	0.00441784	0.00486049	0.00373481	0.00470229	0.0047342	0.00317657	0.00340423	0.00480183	0.00325784	0.00604956	0.00390622
CDIF630erm_03134		putative modulator of DNA gyrase, peptidase U62	0.00242395	0.00283202	0.00123193	0.00352877	0.00484404	0.00143143	0.0019175	0.00223944	0.00213284	0.00126758	0.00471181	0.00199558	0.00266261	0.00187062	0.00147392
CDIF630erm_03135	tldD	metalloprotease TldD	0.00357358	0.00703484	0.00198853	0.00817264	0.00543147	0.0067807	0.00424614	0.00847201	0.0052667	0.00781796	0.0054574	0.00300755	0.00697463	0.00195775	0.00313301
CDIF630erm_03238	atpB1	V-type ATP synthase subunit B	0.00194408	0.00310373	0.00212605	0.00244484	0.00212303	0.00159134	0.00354866	0.00233016	0.00295094	0.00129797	0.0023133	0.0024548	0.00138716	0.00146047	0.00218915
CDIF630erm_03239	atpA1	V-type ATP synthase subunit A	0.00262448	0.00390961	0.00304018	0.0066426	0.00263267	0.00305832	0.00321714	0.00293524	0.00397841	0.00578254	0.00359211	0.00515105	0.00234456	0.00200583	0.00217844
CDIF630erm_03247		peptidoglycan transpeptidase	0.00400412	0.00376665	0.0031745	0.0046997	0.00380163	0.00269791	0.00234083	0.00405102	0.00270241	0.00216332	0.00404764	0.00180374	0.0022559	0.00100283	0.00121949
CDIF630erm_03248		putative tRNA-binding protein	0.00134265	0.00134865	0.00128261	0.0023487	0.00160768	0.00134963	0.000523401	0.000756219	0.00406499	0.00312971	0.00154817	0.00187978	0.000883573	0.00328429	0.00222186
CDIF630erm_03250	adhE2	aldehyde-alcohol dehydrogenase	0.282434	0.328461	0.316446	0.311794	0.256565	0.303489	0.299938	0.279922	0.279612	0.28091	0.273351	0.25375	0.269419	0.310662	0.152979
CDIF630erm_03257		hypothetical protein	0.00321669	0.00301127	0.0047945	0.00466581	0.00266843	0.00225848	0.00160641	0.00164939	0.00204853	0.00496776	0.00540829	0.00225936	0.00146681	0.00242877	0.00304971
CDIF630erm_03283	btuF	ABC-type transport system, cobalamin-spewcific extracellular solute-binding protein	0.00893579	0.00924366	0.00870065	0.00272926	0.00689971	0.00878558	0.0081698	0.00633462	0.00800894	0.00713303	0.00581476	0.0076057	0.00523898	0.00575799	0.0120286
CDIF630erm_03290		transcriptional regulator, IclR family	0.00242219	0.00192654	0.00123819	0.00158115	0.00195187	0.00114261	0.0016503	0.00173156	0.00233882	0.00144693	0.00123332	0.00130209	0.00276189	0.00305083	0.00150815
CDIF630erm_03297		putative mannosylglycerate hydrolase	0.0206652	0.00506127	0.0100581	0.00989606	0.0165363	0.0121037	0.0137658	0.0143072	0.00600293	0.0160204	0.0201917	0.00995455	0.00908732	0.0158381	0.0175304
CDIF630erm_03298		PTS system, mannose-specific IIC component	0.00923882	0.0125574	0.014114	0.0108879	0.0173319	0.0107868	0.0184158	0.00979708	0.0173679	0.00853842	0.0104223	0.00807017	0.0251077	0.0207842	0.0110318
CDIF630erm_03299		PTS system, mannose-specific IIB component	0.0178281	0.00966744	0.0138885	0.0136857	0.0362053	0.0118856	0.0289575	0.0246616	0.0217014	0.0120167	0.0172416	0.0149517	0.0334861	0.0339277	0.0488285
CDIF630erm_03303		CGCAxxGCC motif protein	0.032578	0.0230311	0.0256006	0.0235215	0.0215042	0.0285533	0.0152832	0.0257001	0.0166845	0.0217168	0.0291689	0.0242709	0.0160691	0.0148211	0.0334332
CDIF630erm_03319	yddE_3	putative isomerase YddE	0.00177974	0.00106512	0.00135553	0.000862718	0.00187689	0.00242513	0.00327249	0.00383665	0.00132376	0.0122473	0.00169259	0.00107687	0.00272746	0.00317525	0.00265289
CDIF630erm_03325	pepI	proline iminopeptidase	0.0158691	0.0141733	0.0159857	0.0166259	0.010218	0.0119633	0.0127754	0.014214	0.00974232	0.0159314	0.0185014	0.0124324	0.0129812	0.0137951	0.0110621
CDIF630erm_03327		uncharacterized protein, transglutaminase-like	0.00778456	0.00699913	0.00452302	0.00429533	0.00488554	0.00528027	0.00520096	0.00558685	0.00343252	0.0058562	0.0127055	0.00694982	0.0142757	0.0135638	0.00683323
CDIF630erm_03371		putative cellobiose-phosphate degrading protein	0.00186901	0.00164868	0.00130074	0.00124342	0.00136413	0.00066808	0.00301	0.00126102	0.000774839	0.00195709	0.00190168	0.00175723	0.00317992	0.00336707	0.00443747
CDIF630erm_03372		PTS system, glucose-like IIBC component	0.0224383	0.0201246	0.0212559	0.019395	0.0132863	0.0166997	0.0201739	0.0147814	0.0215935	0.0225773	0.0190392	0.0263187	0.0176694	0.0377625	0.0186165
CDIF630erm_03374	treA	trehalose-6-phosphate hydrolase	0.00725334	0.0206619	0.00886051	0.0056393	0.00647056	0.00752744	0.0155269	0.00569823	0.0109735	0.00850037	0.00888197	0.0124648	0.00635762	0.0110829	0.00573194
CDIF630erm_03382		putative amidohydrolase, M20D family	0.0181853	0.0154623	0.0144195	0.00620988	0.0149909	0.0126702	0.0124059	0.00785893	0.0116649	0.0128286	0.0117087	0.00895171	0.00945569	0.00759851	0.0110676
CDIF630erm_03448	smpB	SsrA-binding protein	0.00363005	0.00124436	0.00209308	0.000640028	0.00314317	0.00211361	0.00450085	0.00256324	0.00369273	0.0025182	0.00209968	0.00287196	0.00167311	0.00131873	0.00137006
CDIF630erm_03449		transcriptional regulator, TRAP family	0.00418	0.00170099	0.00259887	0.00366368	0.00428378	0.00304956	0.00285539	0.00364948	0.00226995	0.00323515	0.00349192	0.00192777	0.00442001	0.00355178	0.00498511
CDIF630erm_03455	rnr	ribonuclease R	0.00376531	0.00153196	0.00181321	0.00229474	0.00263515	0.00306307	0.00143908	0.0020245	0.00096369	0.00124578	0.00303774	0.00187314	0.00672698	0.00232934	0.00145998
CDIF630erm_03458		putative phosphatidylethanolamine-binding regulatory protein	0.00957677	0.00596091	0.0434151	0.00691416	0.00666689	0.00533688	0.00525797	0.00593933	0.00487492	0.00494904	0.00507761	0.0057494	0.00510124	0.00220827	0.00438835
CDIF630erm_03462	eno	enolase	0.319901	0.385523	0.358472	0.16389	0.313483	0.294602	0.418879	0.36398	0.454805	0.354339	0.247548	0.342673	0.159782	0.147466	0.159904
CDIF630erm_03463	gpmI	2,3-bisphosphoglycerate-independent phosphoglycerate mutase	0.0558436	0.0496142	0.0514415	0.0414962	0.0410434	0.0489708	0.0508963	0.044885	0.0562366	0.0497299	0.0465851	0.0417469	0.0429056	0.0437104	0.0232595
CDIF630erm_03464	tpi	triosephosphate isomerase	0.116094	0.134188	0.120416	0.101527	0.116913	0.123308	0.137283	0.123222	0.151202	0.131156	0.112276	0.112186	0.0653918	0.136194	0.0569864
CDIF630erm_03465	pgk	phosphoglycerate kinase	0.14989	0.144309	0.118035	0.0606349	0.129742	0.117426	0.140755	0.140571	0.156351	0.121668	0.1395	0.109298	0.058509	0.0506244	0.0523297
CDIF630erm_03466	gapA	glyceraldehyde-3-phosphate dehydrogenase	0.190829	0.23924	0.243711	0.230609	0.192841	0.235464	0.231699	0.223743	0.257161	0.232897	0.192423	0.22324	0.110038	0.0967015	0.10694
CDIF630erm_03467	cggR	transcriptional regulator, SorC family	0.0104638	0.00561535	0.00554421	0.00590382	0.00368755	0.00547328	0.0063761	0.00766931	0.0074885	0.00415932	0.00629379	0.00574295	0.00565894	0.0046215	0.00265229
CDIF630erm_03484	cwp21	putative cell surface peptidase, M4 family-cwp20	0.00182364	0.000734209	0.0043001	0.00188474	0.00233669	0.0013691	0.00101192	0.00176389	0.00165696	0.00219713	0.00177004	0.00218752	0.0017539	0.00177893	0.0035031
CDIF630erm_03499		putative nitroreductase-like oxidoreductase	0.00344866	0.00405304	0.00538132	0.00362515	0.00257847	0.00363283	0.00387073	0.00521295	0.00332035	0.00355179	0.0052482	0.00447981	0.0040539	0.00447768	0.00541458
CDIF630erm_03513	hslO	heat shock protein 33	0.00379724	0.0029478	0.0031836	0.00225586	0.00268635	0.00253921	0.00274655	0.00206597	0.00179178	0.00368888	0.00243724	0.00239147	0.00471421	0.00432963	0.004525
CDIF630erm_03516		N-acetyldiaminopimelate deacetylase	0.00805422	0.00472685	0.0144392	0.00628058	0.00559156	0.00395404	0.00448133	0.00607451	0.00653945	0.00586589	0.00571172	0.0145146	0.00356549	0.00399577	0.00335872
CDIF630erm_03517	sdaB	L-serine dehydratase	0.0139869	0.0114065	0.0124784	0.0201985	0.0115422	0.0104982	0.00941147	0.0107296	0.00915613	0.00995137	0.00937175	0.00746832	0.009264	0.0115732	0.00525283
CDIF630erm_03518	dapA2	4-hydroxy-tetrahydrodipicolinate synthase	0.0075656	0.00682116	0.00645837	0.00657442	0.0112772	0.00646438	0.00503338	0.00706281	0.00600294	0.0103529	0.0081845	0.00754119	0.0038997	0.00474666	0.00608886
CDIF630erm_03520	asd	aspartate-semialdehyde dehydrogenase	0.026445	0.0185364	0.023531	0.0217464	0.0232217	0.0200463	0.0190945	0.0166818	0.0168063	0.0263337	0.0248766	0.0306211	0.0131917	0.0149735	0.0167918
CDIF630erm_03521	dapA3	4-hydroxy-tetrahydrodipicolinate synthase	0.0235065	0.0260579	0.0234375	0.0354084	0.0248473	0.0288632	0.0247126	0.0237013	0.0280038	0.0287672	0.0300885	0.0230818	0.00917485	0.00953961	0.0142688
CDIF630erm_03522	dapB1	4-hydroxy-tetrahydrodipicolinate reductase	0.01529	0.0155992	0.0158016	0.00893954	0.0123272	0.0130319	0.0110984	0.011029	0.0116638	0.0141449	0.0120649	0.0127276	0.0105276	0.0080173	0.00818049
CDIF630erm_03523	dapH	2,3,4,5-tetrahydropyridine-2,6-dicarboxylate N-acetyltransferase	0.0188018	0.0120178	0.0216247	0.0247777	0.0177134	0.0255483	0.0135641	0.0264362	0.0170168	0.0182915	0.018721	0.0224901	0.0290993	0.0117393	0.016994
CDIF630erm_03527	hpt2	hypoxanthine phosphoribosyltransferase	0.00558558	0.00460444	0.00684789	0.00302669	0.00535908	0.00721562	0.00443865	0.00521354	0.00549085	0.0045489	0.00307084	0.0058168	0.00548244	0.00398341	0.00113659
CDIF630erm_03533	prdF	proline racemase	0.0543346	0.0543843	0.0613553	0.0487978	0.0429848	0.0599153	0.0391394	0.0349914	0.0453384	0.050916	0.0547875	0.0499965	0.0212433	0.0248294	0.0491839
CDIF630erm_03537	prdB	proline reductase PrdB subunit	0.124032	0.116791	0.130315	0.0950698	0.0950927	0.107407	0.0760688	0.0884872	0.0816347	0.110657	0.122754	0.0649035	0.05286	0.0480484	0.111409
CDIF630erm_03540	prdA	D-proline reductase proprotein prdA	0.148183	0.132052	0.13532	0.0866874	0.123791	0.132738	0.115971	0.104521	0.111946	0.115252	0.121132	0.111999	0.112494	0.104981	0.0546688
CDIF630erm_03544	prdC	proline reductase PrdC subunit	0.0138233	0.0134665	0.0156083	0.0153111	0.0135396	0.0149271	0.0110499	0.00824997	0.0116794	0.0163257	0.00951411	0.0137921	0.00737004	0.0139765	0.00917348
CDIF630erm_03547		hypothetical protein	0.00271711	0.00175117	0.000950489	0.00161806	0.00153048	0.00138939	0.00213803	0.001271	0.00200298	0.00196978	0.00129676	0.00285385	0.00274501	0.0136468	0.00299769
CDIF630erm_03549		TSCPD domain protein	0.0144617	0.00997919	0.00676929	0.00662368	0.0115522	0.00964526	0.00663008	0.00811509	0.00527248	0.00632258	0.0117884	0.00569075	0.00785099	0.00729255	0.0103045
CDIF630erm_03553	valS	valine--tRNA ligase	0.0190869	0.0330688	0.0302003	0.0266398	0.0395046	0.0240519	0.0285651	0.024617	0.0337516	0.0223845	0.0219935	0.0458473	0.00977283	0.00870197	0.0134197
CDIF630erm_03569		putative oligoendopeptidase f, M3B family	0.0032369	0.00213267	0.00429231	0.00208813	0.00196434	0.00240574	0.00237138	0.00175311	0.00131876	0.00148758	0.00258777	0.00186179	0.00270827	0.0021642	0.00194764
CDIF630erm_03581	proC2	pyrroline-5-carboxylate reductase	0.015924	0.00535625	0.0066459	0.0200425	0.0102623	0.00716936	0.00640112	0.0115858	0.00807929	0.00778768	0.0142324	0.00730042	0.00737742	0.00313229	0.00603163
CDIF630erm_03582		putative 4-hydroxyproline dehydratase	0.00494091	0.00578957	0.00377199	0.0105932	0.00724735	0.00532772	0.00751099	0.00583731	0.0075506	0.00567757	0.00629481	0.00515642	0.00528063	0.00480013	0.0041471
CDIF630erm_03584		serine protease, HrtA family	0.00869038	0.0103535	0.0109334	0.00596327	0.00509466	0.00698991	0.00721513	0.00397076	0.0100354	0.00645334	0.00245136	0.0037328	0.00422652	0.00194837	0.0024179
CDIF630erm_03585	pgi	glucose-6-phosphate isomerase	0.0563177	0.0459548	0.0523139	0.0425496	0.0418261	0.0438036	0.0453779	0.0521905	0.0507919	0.0535256	0.0352825	0.0468002	0.0318656	0.0288196	0.0345444
CDIF630erm_03589		hypothetical protein	0.00215719	0.00112638	0.000672067	0.0020944	0.00149062	0.00214943	0.0126078	0.00239646	0.00151285	0.00112737	0.00103695	0.000820536	0.0040121	0.00183143	0.00175561
CDIF630erm_03590	yccF	uncharacterized protein YccF	0.00403857	0.00496048	0.00522287	0.0045912	0.00602778	0.00186768	0.00368653	0.00305949	0.00360565	0.00233844	0.00359191	0.0054875	0.00385432	0.00307526	0.00355813
CDIF630erm_03601	engB	GTP-binding protein EngB	0.00428313	0.00413155	0.00332667	0.00407104	0.00604921	0.00290595	0.00309288	0.00456911	0.0039754	0.00456226	0.00329598	0.00309701	0.00245203	0.00215358	0.00386256
CDIF630erm_03602	lon	ATP-dependent protease Lon	0.00555688	0.00641342	0.00825223	0.00741491	0.00493698	0.00779471	0.00623596	0.0054874	0.00579427	0.00435317	0.00993283	0.0101545	0.00364108	0.00441023	0.00508317
CDIF630erm_03605	clpX	ATP-dependent clp protease ATP-binding subunit clpX	0.0307364	0.0231707	0.0165497	0.0354862	0.0260532	0.0206904	0.0199025	0.0247363	0.0294285	0.0204016	0.0298961	0.0255409	0.0431798	0.016617	0.029122
CDIF630erm_03606	clpP1	ATP-dependent clp protease proteolytic subunit	0.0571753	0.0484016	0.0477034	0.0343867	0.0587119	0.0444559	0.0558469	0.0594436	0.0577637	0.0501766	0.0514509	0.0563682	0.0581615	0.0554086	0.0287809
CDIF630erm_03607	tig	trigger factor	0.104453	0.0919529	0.0987221	0.118586	0.0842181	0.0776251	0.0780892	0.107966	0.0763563	0.122895	0.0916611	0.0849534	0.118363	0.0485009	0.0534316
CDIF630erm_03609	rph	bifunctional tRNA nucleotidyltransferase / nucleoside- triphosphate diphosphatase	0.0060706	0.00619864	0.00522966	0.00647664	0.0047306	0.00431552	0.00531645	0.00553148	0.00414019	0.00680011	0.00646368	0.00358346	0.00758176	0.00446971	0.00321321
CDIF630erm_03610	ligA	DNA ligase	0.00379683	0.00280271	0.0098046	0.00372094	0.0046303	0.00832643	0.00317136	0.00145974	0.00152367	0.00329871	0.00193962	0.0240355	0.00116868	0.0049547	0.00465419
CDIF630erm_03615	hydA	iron hydrogenase	0.0027415	0.00357157	0.00334833	0.00226837	0.005629	0.00313337	0.00525084	0.00367966	0.00425912	0.0028557	0.00153595	0.00208895	0.0035565	0.00484939	0.00278772
CDIF630erm_03616	hydN2	electron transport protein	0.00115872	0.00172723	0.0019006	0.00171872	0.00350321	0.00151703	0.00308472	0.00218845	0.0047981	0.0011812	0.000837249	0.000724561	0.000873926	0.0114874	0.00225246
CDIF630erm_03627		putative iron-sulfur cluster-binding protein	0.00265786	0.00239149	0.00164454	0.0010929	0.00212292	0.00100388	0.00116104	0.00197419	0.00190257	0.0016916	0.00223205	0.00186854	0.00163788	0.00236058	0.00263724
CDIF630erm_03655		putative nitroreductase-like oxidoreductase	0.0091364	0.00588612	0.008942	0.00859793	0.0115248	0.00582392	0.0102891	0.00974295	0.0107596	0.00615656	0.00497707	0.00694582	0.00516343	0.00419511	0.0111345
CDIF630erm_03677	mgtA1	magnesium-transporting ATPase, P-type	0.0496154	0.0486023	0.0465313	0.0423087	0.0430055	0.0367979	0.0374312	0.0421814	0.0457865	0.051538	0.0543899	0.0651521	0.0449241	0.0175183	0.02606
CDIF630erm_03699	pyk	pyruvate kinase	0.119459	0.124834	0.112686	0.14975	0.102444	0.127649	0.139981	0.131044	0.13915	0.112775	0.137316	0.11616	0.0648985	0.117238	0.0749426
CDIF630erm_03700	pfkA	ATP-dependent 6-phosphofructokinase	0.0346916	0.0435986	0.0367622	0.0221822	0.0338711	0.0378445	0.047649	0.053172	0.0370049	0.0343395	0.041836	0.0362065	0.0108283	0.0442351	0.042289
CDIF630erm_03705		nucleotide-binding protein	0.00405678	0.00789889	0.00840589	0.00597517	0.0120484	0.00644798	0.00619396	0.00495034	0.0109262	0.00806466	0.00382126	0.00845732	0.00709458	0.00992942	0.00695763
CDIF630erm_03707	murB	UDP-N-acetylenolpyruvoylglucosamine reductase	0.00641865	0.00689819	0.00834885	0.0111491	0.00774181	0.00582341	0.00670607	0.00482019	0.00563673	0.00514166	0.004023	0.00744851	0.00408487	0.0084029	0.0063358
CDIF630erm_03710		hydrogenase (NADP+, ferredoxin), NADPH-binding subunit	0.017406	0.0142408	0.0093339	0.0267268	0.0214986	0.0169248	0.0131806	0.00729856	0.00679141	0.0189159	0.0111002	0.0182938	0.0101739	0.0087938	0.00481881
CDIF630erm_03711		hydrogenase (NADP+, ferredoxin), ferredoxin-binding subunit	0.0174506	0.0191218	0.0163677	0.0267246	0.0333139	0.0261999	0.0160099	0.0153173	0.0153561	0.0238921	0.0291877	0.0221735	0.0239037	0.00670737	0.00570791
CDIF630erm_03712		hydrogenase (NADP+, ferredoxin), iron hydrogenase subunit	0.0158409	0.012836	0.0150301	0.0347352	0.0280942	0.0252102	0.0173109	0.0146786	0.0187348	0.016803	0.0223213	0.020557	0.00734681	0.00681182	0.00961563
CDIF630erm_03714	hprK	PTS system, HPr kinase / phosphorylase	0.00215791	0.00925792	0.000834859	0.00072994	0.00293245	0.0145522	0.00536154	0.00328505	0.00496677	0.00200889	0.0141499	0.00292171	0.00216958	0.00184491	0.00256628
CDIF630erm_03722		ABC-type transport system, sn-glycerol-3-phosphate-specific ATP-binding protein	0.000893094	0.00462851	0.00198873	0.00200725	0.00143243	0.0025126	0.0023091	0.00100907	0.000713636	0.00160815	0.00221756	0.00194912	0.00226599	0.00231386	0.00115458
CDIF630erm_03727	hemB	delta-aminolevulinic acid dehydratase	0.0198744	0.0204456	0.0213023	0.0277369	0.0264957	0.0160142	0.0246537	0.0221852	0.0307298	0.0168503	0.0252618	0.0249394	0.0188833	0.010617	0.0117822
CDIF630erm_03729	hemC	hydroxymethylbilane synthase	0.00404167	0.00132073	0.00260494	0.00347437	0.00334616	0.00596062	0.0041435	0.00195165	0.00301213	0.00844351	0.00414262	0.00222253	0.00381979	0.000933501	0.00102432
CDIF630erm_03730	cbiKP	sirohydrochlorin cobaltochelatase CbiKP	0.00951197	0.0103157	0.00988022	0.0110247	0.00861628	0.010728	0.0109361	0.00791244	0.0115707	0.00804495	0.0110418	0.00893021	0.00729834	0.00618895	0.00617294
CDIF630erm_03732	cbiH	cobalt-factor III methyltransferase	0.0019951	0.00294117	0.00238347	0.00120127	0.00174667	0.000979387	0.00232025	0.00134066	0.00178148	0.00092374	0.00134485	0.0015449	0.00218441	0.0021004	0.00123286
CDIF630erm_03734	cbiF	cobalt-precorrin-4 methyltransferase	0.00303367	0.00222814	0.00346607	0.0015072	0.00223961	0.00258386	0.00235765	0.00470203	0.00246255	0.00204542	0.0013408	0.0019466	0.000742788	0.00432408	0.00338905
CDIF630erm_03738	cbiC	cobalt-precorrin-8 methylmutase	0.00392751	0.00352897	0.00215052	0.00505615	0.00289075	0.00244271	0.00270889	0.00497404	0.00177756	0.00205606	0.00299653	0.00248719	0.00199487	0.00126399	0.00314607
CDIF630erm_03742	cbiA	cobyrinic acid A,C-diamide synthase	0.00418182	0.00305263	0.00294188	0.00472899	0.00239883	0.00411375	0.00401955	0.00406712	0.00415924	0.00241178	0.00261979	0.00329742	0.00310687	0.00286167	0.013078
CDIF630erm_03748	cobT	nicotinate-nucleotide--dimethylbenzimidazole phosphoribosyltransferase	0.00744891	0.0082063	0.00687742	0.00638648	0.00519949	0.00839858	0.00914399	0.0059446	0.00669478	0.00465177	0.00643844	0.00393504	0.00820102	0.00671497	0.0043152
CDIF630erm_03769		putative membrane protein	0.0120999	0.00702495	0.00299597	0.0187851	0.00943639	0.00475666	0.00561374	0.00696111	0.00601387	0.00305461	0.00355954	0.00511678	0.0047533	0.00146357	0.00423017
CDIF630erm_03770	tkt*2	transketolase, C-terminal section	0.0111607	0.011358	0.00877005	0.0154732	0.00970712	0.0101848	0.00824532	0.00906851	0.0156529	0.0101463	0.0100479	0.0101682	0.00885419	0.0078651	0.0133967
CDIF630erm_03771	tkt2	transketolase, N-terminal section	0.00477049	0.003559	0.00234224	0.000825035	0.00439216	0.00387381	0.00519759	0.004671	0.00193282	0.00268403	0.00239436	0.00126318	0.00549511	0.004742	0.00297146
CDIF630erm_03774	alr	alanine racemase	0.0226905	0.0222151	0.0259852	0.0224798	0.0194031	0.014159	0.016801	0.0200925	0.0184959	0.0155143	0.0128266	0.0148789	0.00896429	0.00945288	0.0119503
CDIF630erm_03778	atpC2	ATP hydrolase subunit epsilon	0.00595337	0.00271752	0.00415837	0.00560529	0.00962002	0.00640225	0.00556433	0.0124763	0.00967128	0.00672244	0.0071826	0.010796	0.00676542	0.00369743	0.00557666
CDIF630erm_03779	atpD2	ATP synthase subunit beta	0.0792675	0.0717363	0.0687942	0.117732	0.0741159	0.0776885	0.0724753	0.080879	0.0814366	0.0724341	0.0770445	0.0715103	0.0712822	0.054317	0.0304694
CDIF630erm_03780	atpG	ATP synthase subunit gamma	0.0111775	0.0111462	0.0133431	0.0179656	0.00945556	0.0144343	0.014295	0.0136904	0.0130718	0.016289	0.0130256	0.00883352	0.00836848	0.0136557	0.00687622
CDIF630erm_03781	atpA2	ATP synthase subunit alpha	0.0567814	0.0551869	0.0581755	0.0840461	0.058286	0.0580194	0.0661421	0.0708279	0.0729571	0.0596589	0.0552293	0.0545248	0.0277686	0.0558774	0.0277038
CDIF630erm_03782	atpH	ATP synthase subunit delta	0.0134443	0.014185	0.0167968	0.00991964	0.0136474	0.0150296	0.0142568	0.0201284	0.0170966	0.0104233	0.00680099	0.0157679	0.00419926	0.00649719	0.00615231
CDIF630erm_03783	atpF2	ATP synthase subunit b	0.0134326	0.0122167	0.0120433	0.0156642	0.0121561	0.00931157	0.0115577	0.015683	0.0133206	0.00748162	0.0140392	0.0116532	0.00764607	0.0110485	0.00578292
CDIF630erm_03788	comEB2	deoxycytidylate deaminase	0.00423287	0.00391825	0.00392712	0.00484368	0.00323138	0.00371431	0.00442397	0.00494187	0.00409922	0.00437587	0.00471261	0.00556118	0.00448675	0.0039206	0.00510206
CDIF630erm_03790	upp	uracil phosphoribosyltransferase	0.0275952	0.0203656	0.0253388	0.0263773	0.0290621	0.0254272	0.020029	0.0260875	0.0224463	0.0211955	0.0308704	0.0232161	0.0259459	0.0181063	0.022489
CDIF630erm_03791	rpiB2	ribose-5-phosphate isomerase	0.0257495	0.0471429	0.0231472	0.010428	0.0181293	0.0205637	0.0215645	0.0167554	0.0255197	0.0186877	0.0196726	0.0243845	0.0286659	0.0256879	0.021988
CDIF630erm_03793	ywlC	threonylcarbamoyl-AMP synthase	0.002874	0.00239925	0.00231851	0.00168685	0.00281078	0.00159013	0.00258894	0.00206862	0.00248051	0.00114755	0.00285222	0.00182101	0.00265061	0.00174931	0.0020456
CDIF630erm_03795	prfA	peptide chain release factor 1	0.0224619	0.0208932	0.0223769	0.0240677	0.0155925	0.0173651	0.0187652	0.0277577	0.0201505	0.0151365	0.0201164	0.0193221	0.0129607	0.0196131	0.0220413
CDIF630erm_03798	rpmE	50S ribosomal protein L31	0.111857	0.0923986	0.0998453	0.177524	0.0900422	0.0860833	0.0854387	0.0833215	0.0723842	0.109388	0.102503	0.0801954	0.100257	0.0984048	0.113852
CDIF630erm_03799	rho	transcription termination factor Rho	0.0108561	0.00603216	0.00647036	0.0157394	0.00537072	0.00630649	0.008612	0.0106837	0.011231	0.00733597	0.0090202	0.0201376	0.00313766	0.00611408	0.0081224
CDIF630erm_03801	gtaB2	UTP--glucose-1-phosphate uridylyltransferase	0.00590549	0.00528263	0.00530402	0.0109591	0.00918989	0.0042546	0.00518947	0.00513075	0.00618334	0.00710297	0.0047493	0.00461049	0.00490628	0.00247602	0.00400833
CDIF630erm_03809	hupA	non-specific DNA-binding protein	0.118891	0.127394	0.137413	0.0704675	0.117785	0.126217	0.11025	0.10671	0.128616	0.109011	0.102961	0.125118	0.0749868	0.132655	0.0758118
CDIF630erm_03813	prsA2	peptidyl-prolyl cis-trans isomerase, PpiC-type	0.00495993	0.00929275	0.00816969	0.0103905	0.00850361	0.00691113	0.00582182	0.00928886	0.0065317	0.00758191	0.00502089	0.00670092	0.0251036	0.00328079	0.00505357
CDIF630erm_03826		putative pilin protein	0.00423535	0.00354397	0.00393092	0.0072364	0.00437236	0.003323	0.00431981	0.00487874	0.00440866	0.00303552	0.00439531	0.00491596	0.00497326	0.00244853	0.00288156
CDIF630erm_03828	prs	ribose-phosphate pyrophosphokinase	0.0607178	0.048657	0.0451382	0.0636695	0.0455695	0.0503343	0.0461271	0.0503878	0.052515	0.0458996	0.0549259	0.0424261	0.0342025	0.0466411	0.0189862
CDIF630erm_03829	glmU	bifunctional N-acetylglucosamine-1-phosphate uridyltransferase / glucosamine-1-phosphate N-acetyltransferase	0.00545371	0.00251082	0.00218637	0.00553633	0.00243382	0.0026084	0.00204736	0.00514266	0.00281409	0.00208091	0.00301777	0.00367407	0.00105844	0.00210765	0.00185014
CDIF630erm_03830	spoVG	regulator required for spore cortex synthesis	0.0173887	0.0193964	0.00963733	0.01693	0.0187278	0.0164231	0.0198798	0.0179866	0.0201428	0.00940723	0.00961106	0.00898147	0.0115863	0.0180327	0.00903316
CDIF630erm_03831	purR	transcriptional regulator, purine operon repressor	0.00679904	0.0037722	0.00343934	0.00869818	0.00239197	0.00493497	0.00483082	0.00374815	0.00318083	0.00545758	0.00353437	0.0040835	0.0146357	0.00389969	0.00309004
CDIF630erm_03832	murC	UDP-N-acetylmuramate--L-alanine ligase	0.0152812	0.0131089	0.0138391	0.0178138	0.0114391	0.0158554	0.0123442	0.0121745	0.0121983	0.0124906	0.0118135	0.00990991	0.0097271	0.0156512	0.00480116
CDIF630erm_03835	pepT2	peptidase T	0.0360612	0.0160798	0.0215208	0.0443169	0.0198568	0.0177575	0.0198429	0.0239924	0.0194868	0.0121664	0.0138243	0.0230517	0.0248688	0.0106784	0.0243969
CDIF630erm_03837	rsmA	ribosomal RNA small subunit methyltransferase A	0.00506814	0.00409959	0.00453192	0.00121808	0.00239962	0.00365094	0.00503738	0.00383066	0.00612579	0.0037544	0.00682213	0.00425134	0.00793122	0.00890416	0.0102925
CDIF630erm_03838	rnmV	ribonuclease M5	0.00193033	0.000826516	0.00124316	0.0019616	0.00110312	0.00122403	0.00164372	0.000661361	0.000585436	0.00129689	0.00191583	0.000705548	0.00210018	0.00251707	0.0014448
CDIF630erm_03839		ABC-type transport system, iron-family extracellular solute-binding protein	0.0136283	0.0165046	0.023767	0.0103154	0.0212797	0.0338808	0.0156714	0.00985611	0.020152	0.0190147	0.0245816	0.0224747	0.0141687	0.0136799	0.0356866
CDIF630erm_03853		putative deoxyribonuclease	0.0111729	0.0339118	0.00859008	0.00413158	0.00422226	0.00523409	0.00547829	0.00980871	0.0183668	0.0324136	0.00602627	0.0190142	0.00691091	0.00409315	0.00527442
CDIF630erm_03854	metG	methionine--tRNA ligase	0.0240681	0.0210606	0.0226466	0.0308524	0.0236282	0.0215006	0.0243022	0.0250272	0.019892	0.0251255	0.0318298	0.0201303	0.0243631	0.0114164	0.00916869
CDIF630erm_03858	pncB	nicotinate phosphoribosyltransferase	0.00461941	0.00341503	0.00726187	0.00588871	0.00436498	0.00471623	0.00403895	0.0055476	0.00546656	0.0025874	0.00465607	0.0033919	0.0302239	0.00503688	0.00186759
CDIF630erm_03859		transcriptional regulator, AsnC / lrp family	0.0333818	0.0281915	0.0315183	0.0447029	0.0347619	0.0303142	0.029582	0.036737	0.0295251	0.0319419	0.0313611	0.032411	0.0449864	0.0374789	0.0259308
CDIF630erm_03863		putative YaaT-like protein involved in sporulation or related to DNA replication	0.00553543	0.00649618	0.00619563	0.00567501	0.00746104	0.00510856	0.00782048	0.00553818	0.00901415	0.00388439	0.00838773	0.00819794	0.00342961	0.00315647	0.00325932
CDIF630erm_03872	lysS	lysine--tRNA ligase	0.0324742	0.0238346	0.0317738	0.0437065	0.0266675	0.0226334	0.022944	0.0273489	0.0229156	0.0221102	0.0300071	0.0275533	0.0192529	0.028767	0.0294075
CDIF630erm_03873	greA	transcription elongation factor greA	0.0279758	0.0225144	0.0237868	0.00724692	0.0229799	0.0281416	0.0231356	0.0289393	0.0238666	0.0216099	0.021526	0.0245727	0.0236013	0.0130038	0.0156853
CDIF630erm_03875	coaX	type III pantothenate kinase	0.0068606	0.0066407	0.00753144	0.00625459	0.00663192	0.00431746	0.00675618	0.00768864	0.00773199	0.0070653	0.00715988	0.00594456	0.0128622	0.00399328	0.00362956
CDIF630erm_03879	ftsH2	cell division protease FtsH2	0.00809559	0.0164882	0.015318	0.0181457	0.0137626	0.0119444	0.0123234	0.0139491	0.0135678	0.00799208	0.01485	0.0138778	0.00371938	0.00440938	0.00327336
CDIF630erm_03882	murI	glutamate racemase	0.00512589	0.00237848	0.0025371	0.00174147	0.00222163	0.00298805	0.00181296	0.00210135	0.00213834	0.00184064	0.00225925	0.00269679	0.00241342	0.00491151	0.00189837
CDIF630erm_03885		transcriptional regulator, GntR family	0.00511108	0.00207647	0.00202492	0.00291701	0.00418139	0.00262726	0.00647202	0.00224324	0.00182396	0.00871577	0.00503597	0.00379454	0.00547974	0.00176837	0.00372036
CDIF630erm_03890		membrane dipeptidase	0.00723779	0.00492064	0.0063758	0.0048	0.00534177	0.00469237	0.00538423	0.0057565	0.00505145	0.00640545	0.00563561	0.00395415	0.00429806	0.0026338	0.00673367
CDIF630erm_03892		protein translocase, SecA-like	0.0535241	0.0469982	0.0350982	0.078266	0.0355889	0.0380147	0.0331918	0.0406735	0.0363448	0.0356517	0.0494467	0.0294772	0.0616268	0.0267781	0.0529169
CDIF630erm_03902		putative methyltransferase	0.00220536	0.00244035	0.00258383	0.00317342	0.00248431	0.00113613	0.00248474	0.00192481	0.00211724	0.00132031	0.00193589	0.00251603	0.00877422	0.00195393	0.00397859
CDIF630erm_03910	carB1	carbamoyl-phosphate synthase large subunit	0.011376	0.0102411	0.0100912	0.0161513	0.00909344	0.00884638	0.0108856	0.013828	0.0098055	0.0124483	0.0109575	0.0170866	0.00546244	0.00572272	0.0124772
CDIF630erm_03911	carA1	carbamoyl-phosphate synthase small subunit	0.00708685	0.00704516	0.00905358	0.00757877	0.0072367	0.00698619	0.00739454	0.00631207	0.00879785	0.00926101	0.00707624	0.00638885	0.00836574	0.00543272	0.00696258
CDIF630erm_03912	carB2	carbamoyl-phosphate synthase large subunit	0.0034357	0.0152825	0.00486065	0.00388494	0.00380778	0.0100096	0.011473	0.00697056	0.00625383	0.00286415	0.00419027	0.00671232	0.00185887	0.0107172	0.0110313
CDIF630erm_03913	carA2	carbamoyl-phosphate synthase small subunit	0.00390591	0.00252459	0.00181232	0.00287039	0.00141926	0.00137496	0.00255016	0.00305716	0.00170233	0.00204285	0.00214073	0.00252699	0.00169843	0.00307786	0.00135147
CDIF630erm_03915		putative zinc-binding protein	0.00475444	0.00298063	0.00216096	0.00520799	0.00365374	0.00421126	0.0061354	0.00301107	0.00447427	0.0042918	0.00385248	0.00474004	0.00235815	0.00301112	0.00387257
CDIF630erm_03917		aminopeptidase 2	0.0026539	0.00419947	0.00409237	0.00467465	0.00402602	0.00387622	0.00467074	0.00586575	0.00385348	0.00830493	0.00472895	0.00400756	0.00117966	0.00173113	0.00158983
CDIF630erm_03918	metH	methionine synthase	0.00256105	0.00348819	0.00327369	0.00308165	0.00322051	0.00753666	0.00487874	0.00399522	0.00458499	0.00538676	0.00345223	0.00470232	0.00302425	0.00313705	0.00245133
CDIF630erm_03920	luxS	S-ribosylhomocysteine lyase	0.0105622	0.00481462	0.0087137	0.0131602	0.00770754	0.0054088	0.00862732	0.00988008	0.00566382	0.0136435	0.0150663	0.00790722	0.00660918	0.00668753	0.00716336
CDIF630erm_03930		putative iron-sulfur assembly protein	0.00398346	0.00545615	0.00456713	0.00724517	0.00224115	0.00381062	0.00376619	0.00486377	0.00436152	0.00623524	0.00541563	0.00391823	0.0164345	0.00475833	0.00524871
CDIF630erm_03931		ABC-type transport system, ATP-binding protein	0.00268347	0.00342506	0.0050449	0.00553106	0.0029305	0.00295691	0.00449262	0.00270187	0.00501711	0.0038665	0.00329802	0.00335203	0.00241472	0.00293264	0.00595236
CDIF630erm_03942	yjaB	putative N-acetyltransferase YjaB	0.00830079	0.00831122	0.00902812	0.00451732	0.0073733	0.00665952	0.00516528	0.00643111	0.00491333	0.0108054	0.00424204	0.00703711	0.0063156	0.00579883	0.00730357
CDIF630erm_03945	phnA	phosphonoacetate hydrolase	0.00866153	0.00923143	0.00844784	0.00775978	0.00795392	0.00999417	0.0057769	0.00745593	0.00555882	0.00899812	0.0088262	0.00782741	0.00662897	0.00926953	0.00618596
CDIF630erm_03972	licB	PTS system, lichenan-specific IIB component	0.00130884	0.000862825	0.00101988	0.00148238	0.00185104	0.00152906	0.000931372	0.0015316	0.00251917	0.003329	0.00353201	0.00198334	0.00208117	0.000812945	0.00105762
CDIF630erm_03983	purA	adenylosuccinate synthetase	0.0110335	0.00742463	0.0103163	0.0104786	0.00820189	0.00932962	0.00770574	0.00844803	0.00842274	0.00977721	0.0119472	0.00992277	0.0122521	0.0119003	0.00201431
CDIF630erm_03986	rplI	50S ribosomal protein L9	0.0220118	0.0201144	0.0216918	0.0228618	0.0182531	0.0155428	0.0196181	0.0220566	0.0183566	0.0133331	0.0123199	0.012916	0.0218536	0.0126533	0.0220004
CDIF630erm_03990	rpsR	30S ribosomal protein S18	0.0220847	0.0296674	0.0256508	0.0483938	0.0144152	0.0109026	0.0136987	0.0218961	0.00947083	0.0237449	0.018944	0.0130888	0.0267923	0.0174282	0.0145187
CDIF630erm_03991	ssb2	single-stranded DNA-binding protein	0.029863	0.0184865	0.0186146	0.0108392	0.0225019	0.0178373	0.0231585	0.0239347	0.025226	0.0143019	0.0165895	0.0234683	0.0133325	0.0152501	0.0279677
CDIF630erm_03992	rpsF	30S ribosomal protein S6	0.150458	0.132264	0.157602	0.136987	0.147525	0.189805	0.143779	0.148842	0.118252	0.124704	0.117456	0.122007	0.177213	0.101563	0.240339
CDIF630erm_03993		aromatic-amino-acid aminotransferase	0.20608	0.199566	0.156951	0.192012	0.244035	0.177358	0.189531	0.189814	0.169831	0.181376	0.19974	0.181734	0.0876797	0.0752844	0.140461
CDIF630erm_03995		hypothetical protein	0.00551888	0.00464355	0.00643631	0.0123357	0.00704421	0.00578172	0.00491204	0.00558923	0.00565643	0.00718674	0.00700899	0.00532814	0.0104565	0.00561796	0.00566045
CDIF630erm_03996	yedF	selenium metabolism protein YedF	0.0144645	0.0126046	0.0231594	0.00699622	0.012714	0.018734	0.0111079	0.0105177	0.013241	0.0112185	0.00949147	0.00813047	0.020584	0.0282353	0.0108246
CDIF630erm_03997		transcriptional regulator, TPR family	0.00592043	0.00682922	0.00763576	0.00738312	0.00836885	0.00601495	0.0073373	0.00550654	0.00615569	0.00277462	0.00532202	0.00735402	0.00588697	0.00519943	0.00247491
CDIF630erm_03998		putative exported protein	0.0563888	0.0601925	0.0528779	0.0330291	0.0476017	0.0532755	0.0284358	0.0319637	0.0359431	0.0245546	0.0327051	0.0367348	0.0186717	0.0185813	0.0394283
CDIF630erm_03999	sufS2	putative cysteine desulfurase	0.00782125	0.00759624	0.00723325	0.00589316	0.00597656	0.00703926	0.00646909	0.0103186	0.00985569	0.00849126	0.00797922	0.00375727	0.00967984	0.00698499	0.00621323
CDIF630erm_04000	spo0J	stage 0 sporulation protein J	0.0033336	0.00329828	0.00309475	0.00182226	0.00226749	0.00213891	0.00454884	0.00528529	0.00325551	0.00196494	0.00192775	0.00132523	0.00448373	0.00379933	0.00892606
CDIF630erm_04005	mnmG	tRNA uridine 5-carboxymethylaminomethyl modification enzyme	0.00427585	0.00561123	0.00604852	0.00497398	0.00371146	0.0140805	0.00567671	0.00952666	0.00587707	0.00484547	0.00387073	0.00406744	0.0376888	0.0032431	0.00463137
CDIF630erm_04006	mnmE	transfer RNA modification GTPase MnmE	0.00267665	0.00377668	0.00291537	0.00411484	0.0025708	0.00431592	0.0029427	0.00325639	0.00333205	0.00321881	0.00213798	0.00251819	0.00238201	0.00410917	0.00444021
CDIF630erm_04007	jag	putative SpoIIIJ-associated RNA / ssDNA-binding protein Jag	0.00533284	0.00557443	0.00913111	0.00465115	0.00845495	0.00651351	0.00725249	0.00599189	0.00692989	0.00357864	0.00403432	0.0053315	0.00776804	0.00413646	0.0108419
CDIF630erm_04101		putative conjugative transposon protein, YdcP-like	0.00102581	0.00135146	0.000851471	0.00199415	0.000946992	0.00101135	0.000712625	0.00128301	0.00132949	0.00170883	0.00318746	0.0021961	0.000723899	0.00221302	0.00384627
CDIF630erm_04114	tetM	tetracycline resistance protein	0.0136773	0.0253424	0.0206506	0.0225405	0.0185551	0.0186626	0.0185505	0.0167601	0.0193017	0.0140145	0.0267623	0.0280118	0.0124781	0.0140499	0.0146087
CDIF630erm_00229		putative ATP / GTP-binding protein	0.00297883	0.0025412	0.00149048	0.00290095	0.00300708	0.00144832	0.00150517	0.00231684	0.00206916	0.0022805	0.00166635	0.0018808	#N/A	#N/A	#N/A
CDIF630erm_00666		putative RNA methyltransferase	0.00811598	0.00205192	0.000252975	0.00229444	0.000960916	0.000931955	0.00276112	0.00649414	0.0022486	0.00550913	0.00214907	0.00371267	#N/A	#N/A	#N/A
CDIF630erm_00705		hypothetical protein	0.00478082	0.0014491	0.00426783	0.00202523	0.00242483	0.00220067	0.00316902	0.00658662	0.00484134	0.0035939	0.00122033	0.00314038	#N/A	#N/A	#N/A
CDIF630erm_01545		putative transporter, NRAMP family	0.00472568	0.00402085	0.00248718	0.00546469	0.00384564	0.00206582	0.00456492	0.00339043	0.00356299	0.00273719	0.0027774	0.0025222	#N/A	#N/A	#N/A
CDIF630erm_01606		putative MORN repeat-containing protein	0.000636215	0.000854073	0.00141715	0.00101364	0.000712186	0.00058724	0.00125702	0.00105206	0.000652428	0.000859546	0.00119289	0.000938346	#N/A	#N/A	#N/A
CDIF630erm_01710		fic family protein	0.00186084	0.00211598	0.00123871	0.00606777	0.00146138	0.00307536	0.00103708	0.000930151	0.00153783	0.000948568	0.00162228	0.00144766	#N/A	#N/A	#N/A
CDIF630erm_01896		rela / spot domain protein	0.00144597	0.00321747	0.00239746	0.00577715	0.00329334	0.00376571	0.00158051	0.00358308	0.00250839	0.00295224	0.00157538	0.00251481	#N/A	#N/A	#N/A
CDIF630erm_02030	ftsH1	cell division protease FtsH1	0.00308802	0.00309632	0.00275105	0.00719769	0.00433392	0.00521209	0.00182018	0.00260926	0.00471663	0.00521091	0.00637931	0.00679408	#N/A	#N/A	#N/A
CDIF630erm_02074		putative oxidoreductase	0.00154936	0.00243569	0.00118441	0.000409322	0.0014366	0.00222345	0.00142677	0.00280791	0.00227779	0.00170957	0.00426065	0.00211376	#N/A	#N/A	#N/A
CDIF630erm_02557	rpe1	ribulose-phosphate 3-epimerase	0.00272334	0.000597261	0.00148952	0.00182112	0.00149593	0.00162891	0.00185564	0.00550626	0.0030203	0.000796876	0.000806209	0.0018044	#N/A	#N/A	#N/A
CDIF630erm_02622		aromatic-amino-acid aminotransferase, tyrB-like	0.00127009	0.00343104	0.000623583	0.00282143	0.000740957	0.00136818	0.00255962	0.00525357	0.00166572	0.0159895	0.00155385	0.000724951	#N/A	#N/A	#N/A
CDIF630erm_02647		transcriptional regulator, MarR family	0.00148588	0.00225435	0.00265804	0.00315351	0.00270484	0.00136218	0.00161385	0.00104374	0.00174731	0.00407471	0.00226469	0.00209627	#N/A	#N/A	#N/A
CDIF630erm_02747	argH	argininosuccinate lyase	0.00123388	0.0110787	0.00133645	0.00116726	0.00377683	0.0046166	0.0039369	0.0142732	0.00185353	0.000298964	0.00263764	0.00305085	#N/A	#N/A	#N/A
CDIF630erm_03007	relA	GTP pyrophosphokinase	0.00532596	0.00161186	0.0030459	0.00166323	0.00268131	0.00105623	0.000900601	0.000998669	0.0042856	0.00187134	0.0011826	0.00184213	#N/A	#N/A	#N/A
CDIF630erm_03242	atpE1	V-type ATP synthase subunit E	0.00132173	0.00147664	0.00198809	0.00371463	0.00234648	0.00238039	0.00196452	0.00289917	0.00249741	0.00229321	0.00150083	0.00285033	#N/A	#N/A	#N/A
CDIF630erm_03264		putative CRISPR-associated autoregulator DevR family protein	0.00184814	0.00481336	0.00212502	0.020626	0.00192279	0.00124152	0.00378948	0.00158675	0.00192732	0.0010668	0.00244764	0.00107772	#N/A	#N/A	#N/A
CDIF630erm_03525	dapB2	4-hydroxy-tetrahydrodipicolinate reductase	0.0056794	0.00444391	0.0031239	0.00465662	0.00389182	0.00310407	0.00398557	0.00501506	0.0046712	0.002063	0.00182336	0.00457297	#N/A	#N/A	#N/A
CDIF630erm_03586		putative transporter, YipB-like	0.0027594	0.00480094	0.000614159	0.0117436	0.00343164	0.0096918	0.00521543	0.00464506	0.00485185	0.00760248	0.00144748	0.00530219	#N/A	#N/A	#N/A
CDIF630erm_00360	fliT	flagellar protein FliT	0.0023706	0.00176961	0.00167346	0.00163205	0.00120791	0.00109856	0.00208187	0.0025136	0.00150452	0.00171279	0.000862992	0.0007391	0.00238031	0.00208094	0.00293774
CDIF630erm_00382	fliL	flagellar basal body-associated protein FliL	0.00538417	0.0092178	0.00471793	0.00409145	0.00230198	0.00270923	0.00091038	0.00341854	0.00166677	0.00616073	0.00351075	0.00295987	0.0048975	0.00277034	0.00558796
CDIF630erm_00579		putative dioxygenase	0.00133794	0.00132022	0.000996628	0.00320851	0.0028611	0.00129526	0.00124932	0.000911932	0.00105726	0.00230519	0.00172414	0.000667026	0.00102704	0.001565	0.00171947
CDIF630erm_00788		putative methyltransferase	0.000955758	0.00110188	0.000841264	0.00244667	0.00152776	0.000561809	0.00126453	0.00154066	0.000680798	0.0107801	0.00105893	0.00137074	0.000874368	0.00101907	0.00114173
CDIF630erm_01481	selU	tRNA 2-selenouridine synthase	0.000829869	0.00162715	0.00131468	0.00105803	0.0026866	0.00153878	0.00348021	0.00129563	0.00361384	0.00154305	0.00154982	0.00139063	0.0012653	0.00215996	0.00100114
CDIF630erm_02270		transcriptional regulator, RpiR family	0.00313512	0.00274433	0.00302176	0.00156913	0.00449218	0.00156885	0.00208134	0.0019649	0.00174917	0.00606643	0.00366408	0.00211588	0.00208456	0.00345662	0.00419928
CDIF630erm_02571	mtlF	PTS system, mannitol-specific, EIIA component	0.00361097	0.00213176	0.00435727	0.00120446	0.00687924	0.00341315	0.0054549	0.00217815	0.00169535	0.00423512	0.00415228	0.00186395	0.00290424	0.00317982	0.00256401
CDIF630erm_02693	mtaB	threonylcarbamoyladenosine tRNA methylthiotransferase	0.00170023	0.00332559	0.00095969	0.00109013	0.00126202	0.00189151	0.000761553	0.00135028	0.000503771	0.000794878	0.00199838	0.00105613	0.0132717	0.000993776	0.00192058
CDIF630erm_02777	recX	regulatory protein RecX	0.00183849	0.00164779	0.00121221	0.00409863	0.00103435	0.00140993	0.00118467	0.00195115	0.000718091	0.00192706	0.000568816	0.00050953	0.000864823	0.00259401	0.00188987
CDIF630erm_02854	cstA	carbon starvation protein, CstA	0.0131024	0.0107801	0.00493891	0.00373097	0.0129264	0.00597577	0.00418448	0.0119192	0.00437681	0.00618087	0.0042631	0.00836925	0.00731105	0.00212804	0.00207682
CDIF630erm_03045	cwp7	cell wall binding protein cwp7	0.00263443	0.00114394	0.0012933	0.00169844	0.00121772	0.0026288	0.00171155	0.00383229	0.00196308	0.00223052	0.00227662	0.00105587	0.000787324	0.00400419	0.00121514
CDIF630erm_03108		putative amidohydrolase	0.0032563	0.00310957	0.00348102	0.00321345	0.00167956	0.00397428	0.00541206	0.00305599	0.00400062	0.00301236	0.00178541	0.00257264	0.00128708	0.00340259	0.00235999
CDIF630erm_04002	noc	nucleoid occlusion protein	0.00512735	0.000977942	0.00227393	0.00253698	0.00303641	0.00224088	0.00171746	0.0018359	0.00215987	0.00195167	0.0014846	0.0013593	0.00419796	0.00260427	0.0031299
CDIF630erm_01144		S1 RNA binding domain protein	0.00140064	0.000352271	0.000402168	0.000934012	0.00146161	0.000654089	0.00119484	0.00150621	0.00120128	0.000930709	0.0020564	0.00137492	#N/A	#N/A	#N/A
CDIF630erm_02117	eutB	ethanolamine ammonia lyase large subunit	0.00115841	0.0793121	0.00181269	0.00738913	0.0142563	0.0862877	0.0650876	0.00553084	0.00247672	0.00792254	0.00503807	0.0734716	#N/A	#N/A	#N/A
CDIF630erm_00034	ugtP1	processive diacylglycerol beta-glucosyltransferase	0.00246067	0.00168597	0.00183399	0.00539248	0.00503387	0.00197962	0.00277308	0.00358904	0.000846945	#N/A	#N/A	#N/A	0.00449768	0.00333741	0.00259469
CDIF630erm_00350	fliN1	flagellar motor switch protein FliN	0.0072231	0.00744788	0.00701744	0.00635808	0.0107411	0.00811842	0.00646386	0.00770303	0.00481909	#N/A	#N/A	#N/A	0.0151376	0.0103998	0.0142775
CDIF630erm_00469		uncharacterized protein	0.00163747	0.00157731	0.00132411	0.00182451	0.00134456	0.0014471	0.00170262	0.0022033	0.000824725	#N/A	#N/A	#N/A	0.00314126	0.00206555	0.00276476
CDIF630erm_00760		transcriptional regulator, GntR family	0.00187376	0.00182058	0.000881638	0.000970344	0.00109973	0.000903127	0.00116767	0.000965979	0.000918529	#N/A	#N/A	#N/A	0.0015326	0.00214789	0.00177194
CDIF630erm_01369	nudF	ADP-ribose pyrophosphatase	0.00292624	0.003019	0.00243293	0.00257696	0.0017433	0.00169174	0.0024282	0.00238524	0.00219806	#N/A	#N/A	#N/A	0.0017413	0.00133812	0.00156818
CDIF630erm_01471	ribF	riboflavin biosynthesis protein	0.00135914	0.000743374	0.00143787	0.00109067	0.00109927	0.000519849	0.00155845	0.00147339	0.00208958	#N/A	#N/A	#N/A	0.00170593	0.00137632	0.00126834
CDIF630erm_01494	malH2	maltose-6*-phosphate glucosidase	0.0178358	0.0233944	0.00844874	0.00142127	0.0113404	0.00708605	0.00359881	0.00669631	0.00572446	#N/A	#N/A	#N/A	0.00391137	0.00569415	0.0130587
CDIF630erm_01615	folB	dihydroneopterin aldolase	0.0016463	0.0033383	0.00319568	0.00258582	0.00209513	0.00237847	0.00305143	0.00228186	0.00216641	#N/A	#N/A	#N/A	0.00213203	0.00322296	0.00194778
CDIF630erm_01977	larE	Ni2+ transfer protein	0.000942071	0.00253276	0.00107657	0.00266066	0.000894736	0.00149741	0.00248625	0.0013007	0.00225365	#N/A	#N/A	#N/A	0.00207089	0.00176442	0.00259873
CDIF630erm_02542		putative pilin protein	0.00186888	0.00195037	0.00206939	0.00147894	0.00381812	0.00328392	0.00123741	0.00277528	0.00130666	#N/A	#N/A	#N/A	0.00168048	0.00126747	0.00220487
CDIF630erm_02749	ycsE	putative 5-amino-6-(5-phospho-D-ribitylamino)uracil phosphatase	0.00251267	0.00160104	0.00224589	0.00112686	0.00308635	0.00295632	0.00309967	0.00305994	0.00355865	#N/A	#N/A	#N/A	0.00187658	0.0016933	0.00323044
CDIF630erm_02814	rpmB	50S ribosomal protein L28	0.0351119	0.0430739	0.0234082	0.0551521	0.0386978	0.0328404	0.031111	0.0354725	0.022592	#N/A	#N/A	#N/A	0.0150075	0.0103794	0.0172823
CDIF630erm_02918	murE	UDP-N-acetylmuramoyl-L-alanyl-D-glutamate--2,6-diaminopimelate ligase	0.00429714	0.00127683	0.00118294	0.0016027	0.00235848	0.00198686	0.00202505	0.00240968	0.00414361	#N/A	#N/A	#N/A	0.00456703	0.00200595	0.00222937
CDIF630erm_03038		putative CDP-glycerol / ribitol transferase	0.00288218	0.00268556	0.00162218	0.00250915	0.00522155	0.00179891	0.00117707	0.00119881	0.00218745	#N/A	#N/A	#N/A	0.00283707	0.00360278	0.0167329
CDIF630erm_03612		hypothetical protein	0.00168454	0.00187183	0.00154838	0.00677287	0.000885652	0.00241435	0.000853598	0.00204829	0.00130789	#N/A	#N/A	#N/A	0.00236581	0.00105047	0.000890488
CDIF630erm_03728	cobA-hemD	bifunctional uroporphyrinogen-III methyltransferase / uroporphyrinogen-III synthase	0.0010267	0.0019423	0.00197541	0.00664004	0.0086584	0.00222138	0.00204952	0.00430786	0.00298252	#N/A	#N/A	#N/A	0.00264934	0.00167983	0.00441317
CDIF630erm_03743	cobQ	adenosylcobyric acid synthase (glutamine-hydrolysing)	0.00167599	0.00503491	0.0031373	0.00457917	0.00562852	0.00736209	0.00520468	0.00190044	0.00156346	#N/A	#N/A	#N/A	0.0007921	0.00291701	0.00156243
CDIF630erm_03842		ABC-type transport system, iron-family extracellular solute-binding protein	0.00239463	0.0109863	0.0023557	0.000629266	0.00196727	0.0015359	0.00173159	0.00465449	0.00159328	#N/A	#N/A	#N/A	0.00135835	0.000304382	0.00106375
CDIF630erm_03874	dusB	tRNA-dihydrouridine synthase B	0.00198107	0.00191847	0.00122294	0.00234272	0.00208281	0.00131478	0.00176657	0.00256815	0.00174128	#N/A	#N/A	#N/A	0.00156844	0.000841343	0.00289519
CDIF630erm_03878	birA	bifunctional ligase / repressor BirA	0.0035122	0.00260609	0.00231388	0.00293176	0.000997394	0.00111844	0.0011753	0.00730551	0.00184199	#N/A	#N/A	#N/A	0.00177963	0.000663494	0.00234478
CDIF630erm_00828		hypothetical protein	0.00205172	0.00162766	0.00126574	0.00141958	0.000371365	0.000527438	0.00256785	0.00212784	0.00106099	#N/A	#N/A	#N/A	#N/A	#N/A	#N/A
CDIF630erm_01002	glgC	glucose-1-phosphate adenylyltransferase	0.00461496	0.00496146	0.00519733	0.00176937	0.00200384	0.00243008	0.00595827	0.00202326	0.00245808	#N/A	#N/A	#N/A	#N/A	#N/A	#N/A
CDIF630erm_01720	hisH	imidazole glycerol phosphate synthase subunit HisH	0.00279247	0.00178676	0.00261056	0.0105013	0.00803981	0.00192519	0.00144006	0.0015832	0.00180103	#N/A	#N/A	#N/A	#N/A	#N/A	#N/A
CDIF630erm_01829		putative tellurium resistance protein	0.00326851	0.00407249	0.00881832	0.00286838	0.00103141	0.0046451	0.00355083	0.00146994	0.00480855	#N/A	#N/A	#N/A	#N/A	#N/A	#N/A
CDIF630erm_01922		putative acetyltransferase	0.00403018	0.000739812	0.00141035	0.00103341	0.00084394	0.00207638	0.00123144	0.000878329	0.00026832	#N/A	#N/A	#N/A	#N/A	#N/A	#N/A
CDIF630erm_02602		ABC-type transport system, sulfonates-family permease	0.00180533	0.00408191	0.00176591	0.00286984	0.00247671	0.00578014	0.00372283	0.00297391	0.00233514	#N/A	#N/A	#N/A	#N/A	#N/A	#N/A
CDIF630erm_02633		putative tRNA-binding protein	0.0014788	0.00150894	0.00156468	0.000449026	0.00154098	0.00142199	0.00134744	0.00190794	0.00202726	#N/A	#N/A	#N/A	#N/A	#N/A	#N/A
CDIF630erm_03475		putative peptidase, M20 family	0.00131029	0.00154948	0.00165193	0.000536821	0.00176991	0.00569675	0.00217133	0.00172102	0.00128939	#N/A	#N/A	#N/A	#N/A	#N/A	#N/A
CDIF630erm_00346	purD	phosphoribosylamine--glycine ligase	0.00153751	0.00198707	0.000655304	0.00145697	0.00276292	0.00146605	0.000672074	0.00336807	0.0058498	#N/A	#N/A	#N/A	0.00257684	0.00237711	0.00188108
CDIF630erm_00853	hisK	histidinol-phosphatase	0.0019935	0.00161203	0.00086428	0.00380674	0.000744514	0.00219859	0.000974952	0.0015581	0.000781032	#N/A	#N/A	#N/A	0.00108675	0.00104864	0.0011682
CDIF630erm_01542	glpK2	glycerol kinase	0.00290982	0.00135835	0.00125522	0.00197403	0.00204724	0.00176327	0.00157618	0.00207813	0.00196902	#N/A	#N/A	#N/A	0.00103816	0.00115406	0.000903192
CDIF630erm_03989		uncharacterized protein	0.00276139	0.00187439	0.00428346	0.00569319	0.00213134	0.0040661	0.0022124	0.00135178	0.00272079	#N/A	#N/A	#N/A	0.00129805	0.00256403	0.00108427
CDIF630erm_00865		putative diguanylate kinase signaling protein	0.00232156	0.00165951	0.00140559	0.0126867	0.00214378	0.00195678	0.0023565	0.00241204	0.00325791	#N/A	#N/A	#N/A	#N/A	#N/A	#N/A
CDIF630erm_00268	tsaE	tRNA threonylcarbamoyladenosine biosynthesis protein TsaE	0.00132387	0.00358185	0.00121731	0.00348915	0.00305691	0.00380554	#N/A	#N/A	#N/A	0.00323034	0.00153696	0.0006706	0.00295741	0.000561172	0.00130571
CDIF630erm_00305	pyrB	aspartate carbamoyltransferase	0.00113029	0.0017924	0.00135761	0.000858617	0.00141105	0.000971626	#N/A	#N/A	#N/A	0.000653659	0.000516986	0.00126231	0.000984916	0.000846113	0.00112034
CDIF630erm_00701		uncharacterized protein	0.0027943	0.00176681	0.00293084	0.00972631	0.00550838	0.00632448	#N/A	#N/A	#N/A	0.00265553	0.00356226	0.00101036	0.00278469	0.00147269	0.00228802
CDIF630erm_00927		hypothetical protein	0.00328607	0.0014062	0.00205366	0.00178648	0.00233984	0.0010133	#N/A	#N/A	#N/A	0.000651373	0.000495572	0.00209122	0.0017255	0.000823722	0.000559173
CDIF630erm_01151		two-component sensor histidine kinase	0.018445	0.0128272	0.012912	0.0174596	0.00684076	0.0157888	#N/A	#N/A	#N/A	0.0136511	0.0103493	0.00625593	0.00141641	0.0140147	0.0211396
CDIF630erm_01427	topA	DNA topoisomerase I	0.00460948	0.00741364	0.00370589	0.0167721	0.00790242	0.00523736	#N/A	#N/A	#N/A	0.00776587	0.00370613	0.00390136	0.00224604	0.00499249	0.00774902
CDIF630erm_02088		transcriptional regulator, AraC family	0.0029134	0.00145744	0.00136502	0.00413922	0.00209765	0.00618645	#N/A	#N/A	#N/A	0.0014963	0.00201659	0.000573822	0.00728784	0.00162198	0.00387434
CDIF630erm_02335	tal1	transaldolase	0.000768144	0.00317528	0.0011028	0.0015976	0.0038851	0.00194429	#N/A	#N/A	#N/A	0.00111684	0.00225381	0.00262821	0.00349314	0.00210643	0.00422044
CDIF630erm_02361	dxr	1-deoxy-D-xylulose 5-phosphate reductoisomerase	0.00838781	0.00325147	0.00394578	0.0229827	0.000800027	0.00601645	#N/A	#N/A	#N/A	0.00461161	0.010261	0.00758082	0.0085697	0.00682152	0.00691856
CDIF630erm_02397		transcriptional regulator, HTH-type	0.00108765	0.000955016	0.00223813	0.00148976	0.000925401	0.000234038	#N/A	#N/A	#N/A	0.000940865	0.000486154	0.000805066	0.00375814	0.000686261	0.00100827
CDIF630erm_02741	selB	selenocysteinyl-tRNA-specific translation factor	0.00643406	0.002415	0.00523557	0.00892069	0.000981256	0.00287791	#N/A	#N/A	#N/A	0.00066491	0.00605379	0.0112395	0.00350969	0.00276673	0.00367738
CDIF630erm_03041		putative glycosyl transferase	0.00163878	0.000919267	0.00114117	0.00172366	0.00106451	0.000843422	#N/A	#N/A	#N/A	0.00092241	0.0040051	0.000933989	0.000921269	0.00716067	0.018048
CDIF630erm_03117		transcriptional regulator, DeoR family	0.00201732	0.00306334	0.00138886	0.00205274	0.00153831	0.00117667	#N/A	#N/A	#N/A	0.00102708	0.00110565	0.00108817	0.00326106	0.00111838	0.00125952
CDIF630erm_03841		ABC-type transport system, iron-family ATP-binding protein	0.00126189	0.00149093	0.000177555	0.00101329	0.0016076	0.00145962	#N/A	#N/A	#N/A	0.000905605	0.00226325	0.00106757	0.000972969	0.00423823	0.00269493
CDIF630erm_03881		putative calycin	0.00137811	0.00185632	0.0010344	0.00188706	0.00145184	0.00119313	#N/A	#N/A	#N/A	0.00126441	0.00191117	0.000677289	0.000944557	0.00705623	0.00179002
CDIF630erm_01364		putative thiamine diphosphokinase	0.0019929	0.00148331	0.00164658	0.00225946	0.00105823	0.000735017	#N/A	#N/A	#N/A	0.00055207	0.00126064	0.00153243	#N/A	#N/A	#N/A
CDIF630erm_01690	pgdA1	putative peptidoglycan-N-acetylglucosamine deacetylase	0.00316725	0.00328828	0.00447912	0.00364899	0.00152675	0.00156672	#N/A	#N/A	#N/A	0.00208523	0.00117381	0.00211534	#N/A	#N/A	#N/A
CDIF630erm_01799		peptidase propeptide and ypeb domain protein	0.0296584	0.0025089	0.00163087	0.00163117	0.000927545	0.00192493	#N/A	#N/A	#N/A	0.0264265	0.0037345	0.00122488	#N/A	#N/A	#N/A
CDIF630erm_02650		putative multidrug efflux pump	0.0066892	0.00287243	0.00137312	0.00124297	0.00240046	0.00433604	#N/A	#N/A	#N/A	0.00530352	0.0066011	0.00200641	#N/A	#N/A	#N/A
CDIF630erm_02709	hrcA	transcriptional regulator, heat-inducible repressor HrcA	0.00324101	0.0015742	0.00128122	0.00330115	0.00224421	0.00276446	#N/A	#N/A	#N/A	0.00350977	0.00747362	0.00829689	#N/A	#N/A	#N/A
CDIF630erm_03032	capD	putative capsular polysaccharide biosynthesis protein	0.00257879	0.00160177	0.000908622	0.00542429	0.00221636	0.00221455	#N/A	#N/A	#N/A	0.000962116	0.00139494	0.00462097	#N/A	#N/A	#N/A
CDIF630erm_01159		putative transcriptional regulator, HTH	0.000920829	0.00147484	0.00182949	0.00364504	0.000936175	0.000796773	#N/A	#N/A	#N/A	0.00159725	0.00174411	0.00120773	0.00205881	0.00354131	0.00113787
CDIF630erm_01420		ABC-type transport system, multidrug-family permease	0.0046718	0.000321038	0.00410487	0.00352899	0.00652564	0.00423211	#N/A	#N/A	#N/A	0.00375172	0.00246968	0.00711206	0.00385334	4.94931e-05	0.00256546
CDIF630erm_01996		coenzyme A disulfide reductase	0.00190755	0.00263531	0.00199946	0.000847857	0.00192544	0.0019298	#N/A	#N/A	#N/A	0.00313713	0.00094839	0.00143069	#N/A	#N/A	#N/A
CDIF630erm_01003	glgD	glycogen biosynthesis protein	0.00242486	0.00350911	0.00256812	0.00106638	0.000979106	0.00197097	#N/A	#N/A	#N/A	#N/A	#N/A	#N/A	0.00189161	0.00164272	0.000799967
CDIF630erm_01547	kipA	KipI antagonist	0.00185376	0.00269508	0.00478018	0.00150332	0.00229066	0.00361394	#N/A	#N/A	#N/A	#N/A	#N/A	#N/A	0.00137528	0.00220025	0.000831078
CDIF630erm_02035	aroB	3-dehydroquinate synthase	0.00114423	0.00114218	0.000574351	0.00118811	0.00356736	0.000544342	#N/A	#N/A	#N/A	#N/A	#N/A	#N/A	0.00168809	0.00312635	0.000686703
CDIF630erm_03468	rpoN	RNA polymerase sigma-54 factor	0.00338929	0.00421872	0.00152033	0.00163349	0.000693993	0.0051449	#N/A	#N/A	#N/A	#N/A	#N/A	#N/A	0.00659246	0.00259301	0.00372302
CDIF630erm_03703		putative hydrolase, NUDIX family	0.00326659	0.00179419	0.00317938	0.00203098	0.00112184	0.00125245	#N/A	#N/A	#N/A	#N/A	#N/A	#N/A	0.00355206	0.000846413	0.00244226
CDIF630erm_03036	tuaG2	putative glycosyl transferase, family 2	0.00094916	0.00222073	0.00264487	0.0018052	0.00186017	0.00652182	#N/A	#N/A	#N/A	#N/A	#N/A	#N/A	#N/A	#N/A	#N/A
CDIF630erm_03232		transcriptional regulator, HTH-type	0.00280205	0.000102188	0.00288349	0.000475865	0.00204658	0.00220887	#N/A	#N/A	#N/A	#N/A	#N/A	#N/A	#N/A	#N/A	#N/A
CDIF630erm_01193		YbaK / aminoacyl-tRNA synthetase-associated protein	0.00367833	0.00266104	0.00386894	0.000799152	0.00316017	0.00142465	#N/A	#N/A	#N/A	#N/A	#N/A	#N/A	0.00179578	0.00340051	0.00205321
CDIF630erm_02338		two-component sensor histidine kinase	0.000962931	0.00159677	0.00142597	0.00430093	0.00335777	0.00158476	#N/A	#N/A	#N/A	#N/A	#N/A	#N/A	0.00150822	0.00228172	0.00186279
CDIF630erm_02654		putative transcriptional repressor ccpn	0.00176194	0.00121895	0.0012373	0.00390882	0.0028027	0.00211896	#N/A	#N/A	#N/A	#N/A	#N/A	#N/A	0.00211022	0.00809149	0.00200792
CDIF630erm_03767		5-formyltetrahydrofolate cyclo-ligase	0.00285946	0.000504027	0.000426045	0.00148854	0.00120926	0.000764403	#N/A	#N/A	#N/A	#N/A	#N/A	#N/A	0.00121801	0.00146914	0.000346053
CDIF630erm_03891		hypothetical protein	0.00225057	0.00261589	0.00185043	0.00105081	0.00247112	0.00156572	#N/A	#N/A	#N/A	#N/A	#N/A	#N/A	0.00187604	0.00877962	0.00388475
CDIF630erm_01645		putative tryptophan RNA-binding attenuation protein	0.00114946	0.00104764	0.00106846	0.00253201	0.000982064	0.00142006	#N/A	#N/A	#N/A	#N/A	#N/A	#N/A	#N/A	#N/A	#N/A
CDIF630erm_01725		putative polysaccharide deacetylase	0.00143129	0.00209567	0.00204062	0.00284279	0.00206862	0.00153013	#N/A	#N/A	#N/A	#N/A	#N/A	#N/A	#N/A	#N/A	#N/A
CDIF630erm_02024		hypothetical protein	0.00371855	0.00652736	0.000914348	0.000795968	0.0120064	0.00265917	#N/A	#N/A	#N/A	#N/A	#N/A	#N/A	#N/A	#N/A	#N/A
CDIF630erm_03888		protein veg	0.00322651	0.00103929	0.00172617	0.00219827	0.00093796	0.00165026	#N/A	#N/A	#N/A	#N/A	#N/A	#N/A	#N/A	#N/A	#N/A
CDIF630erm_00162		ribosomal protein L14E / L6E / L27E-like	0.00418623	0.00337557	0.00332889	#N/A	#N/A	#N/A	0.00359507	0.00574158	0.00121548	0.00214473	0.00522866	0.00368486	0.00477761	0.00373722	0.00338773
CDIF630erm_00316	larB	Ni2+ loading protein for larE	0.00708328	0.00177426	0.00272368	#N/A	#N/A	#N/A	0.00244345	0.00416375	0.00193987	0.00880163	0.00619621	0.00953651	0.00484798	0.00138831	0.00167157
CDIF630erm_00373	fliH	flagellar assembly protein FliH	0.00182246	0.000658925	0.000485947	#N/A	#N/A	#N/A	0.00127396	0.00468883	0.00330786	0.00265683	0.00234196	0.000854536	0.00160896	0.00208584	0.000638732
CDIF630erm_00478		putative hydrolase, HAD superfamily	0.00333135	0.00192583	0.00223968	#N/A	#N/A	#N/A	0.00185927	0.00239012	0.00263285	0.00191473	0.00337072	0.00205419	0.00265098	0.00316962	0.00429215
CDIF630erm_00819		putative metal-dependent phosphohydrolase	0.00404731	0.00376057	0.00203269	#N/A	#N/A	#N/A	0.00435933	0.0034381	0.00404699	0.00194337	0.00217243	0.00265628	0.00386795	0.0043044	0.00379691
CDIF630erm_00838	metF	putative electron bifurcating methylenetetrahydrofolate reductase, large subunit	0.00303993	0.00218448	0.00160642	#N/A	#N/A	#N/A	0.00268215	0.00346287	0.00341369	0.00122218	0.00151618	0.000383818	0.00129933	0.00149879	0.00125139
CDIF630erm_00839	lpdA	glycine cleavage system, dihydrolipoyl dehydrogenase subunit	0.00374693	0.00445768	0.00848197	#N/A	#N/A	#N/A	0.00421459	0.00580902	0.00497943	0.00106034	0.00149128	0.0015007	0.00276077	0.00312641	0.0030138
CDIF630erm_00845	gcvH	glycine cleavage system, H protein	0.0253073	0.0281927	0.0182975	#N/A	#N/A	#N/A	0.01791	0.0211885	0.0148895	0.00868321	0.0116415	0.00928097	0.0131337	0.0201156	0.019646
CDIF630erm_00871	iscS1	cysteine desulfurase	0.00193825	0.00207405	0.00256306	#N/A	#N/A	#N/A	0.00139757	0.00203874	0.00253054	0.00249579	0.000831572	0.001354	0.00134753	0.00248476	0.00169895
CDIF630erm_00874		putative nitroreductase-like oxidoreductase	0.00392649	0.00621969	0.00532866	#N/A	#N/A	#N/A	0.00539916	0.00407753	0.00254128	0.00573132	0.00419858	0.00349482	0.00624262	0.00638321	0.00777869
CDIF630erm_01017		uncharacterized protein	0.00903401	0.00492302	0.00410902	#N/A	#N/A	#N/A	0.00516437	0.0135019	0.00708132	0.0048365	0.0117289	0.00114319	0.00770495	0.00506741	0.00624802
CDIF630erm_01068		putative phage protein	0.00302176	0.00319713	0.00329686	#N/A	#N/A	#N/A	0.00409612	0.00532889	0.0058678	0.00449482	0.00497711	0.00378225	0.00395842	0.00423626	0.00433067
CDIF630erm_01290		putative maf-like protein	0.00655074	0.000264411	0.0007775	#N/A	#N/A	#N/A	0.0023878	0.00249148	0.00117606	0.0318103	0.00164153	0.000640958	0.000801172	0.00144775	0.00162515
CDIF630erm_01511	cspB	cold shock protein CspB	0.101921	0.177281	0.000982505	#N/A	#N/A	#N/A	0.205019	0.158228	0.00117614	0.20532	0.160989	0.00105884	0.01451	0.229281	0.28887
CDIF630erm_01617	aroF1	3-deoxy-7-phosphoheptulonate synthase	0.0014998	0.00108383	0.00187323	#N/A	#N/A	#N/A	0.00144969	0.000679479	0.000915035	0.00118307	0.00126428	0.0018136	0.000773932	0.00137017	0.00143849
CDIF630erm_01900	mogA	molybdopterin adenylyltransferase	0.00253825	0.0010442	0.00300341	#N/A	#N/A	#N/A	0.000786227	0.00145883	0.00144433	0.00160893	0.00162346	0.000335118	0.00197503	0.00146541	0.00112616
CDIF630erm_01984	argG	argininosuccinate synthase	0.00285992	0.00320265	0.00228294	#N/A	#N/A	#N/A	0.00239878	0.00179147	0.00340835	0.00167624	0.00207562	0.00153757	0.00254029	0.00228038	0.0030637
CDIF630erm_02097		putative methyltransferase, type 11 family	0.0017349	0.00475523	0.00288903	#N/A	#N/A	#N/A	0.00339622	0.00318737	0.00234962	0.00635939	0.00213907	0.00265261	0.0020022	0.00115173	0.00276504
CDIF630erm_02098	proX	prolyl-tRNA editing protein	0.0012436	0.00105606	0.00241277	#N/A	#N/A	#N/A	0.00109521	0.00288347	0.00183509	0.00302011	0.00275734	0.00487119	0.00245816	0.00119702	0.00063816
CDIF630erm_02179	hfq	Hfq-like RNA chaperone	0.00446804	0.0115315	0.0151257	#N/A	#N/A	#N/A	0.00346499	0.0149157	0.0149678	0.00320544	0.00964516	0.00844102	0.00434117	0.0106374	0.0102342
CDIF630erm_02275	lysA	diaminopimelate decarboxylase	0.00399709	0.00305301	0.00396815	#N/A	#N/A	#N/A	0.00452746	0.00234523	0.00424507	0.00339453	0.00359404	0.00604403	0.00534887	0.00426897	0.00429372
CDIF630erm_02288		transcriptional regulator, beta-lactams repressor	0.00153659	0.000957639	0.00140855	#N/A	#N/A	#N/A	0.000627428	0.000873117	0.000573401	0.00131205	0.000883335	0.000511788	0.00207619	0.00120522	0.00159454
CDIF630erm_02492		hypothetical protein	0.00137765	0.00325139	0.00303216	#N/A	#N/A	#N/A	0.0029942	0.0018505	0.0034448	0.00160668	0.00353306	0.00287503	0.00272385	0.00245874	0.00338705
CDIF630erm_02493		cupin domain protein	0.00582524	0.00672677	0.00700541	#N/A	#N/A	#N/A	0.00474563	0.00395549	0.00716696	0.00558157	0.0126289	0.00504259	0.00935483	0.00963272	0.0104874
CDIF630erm_02500		putative oxidoreductase, FAD dependent	0.00224496	0.00406675	0.00629215	#N/A	#N/A	#N/A	0.00474662	0.00863272	0.00881154	0.0039315	0.0107727	0.00481514	0.00977803	0.0042439	0.00389963
CDIF630erm_02640	ttcA1	putative 2-thiocytidine tRNA biosynthesis protein TtcA	0.00238355	0.00213023	0.00163244	#N/A	#N/A	#N/A	0.00139975	0.00255039	0.00191267	0.00973079	0.00231964	0.00274411	0.0021463	0.00209842	0.0056149
CDIF630erm_02645	dut	dUTP diphosphatase	0.0107908	0.00524337	0.00477365	#N/A	#N/A	#N/A	0.00516909	0.0141695	0.0041929	0.0086618	0.00357999	0.00312894	0.00831134	0.0050158	0.00975157
CDIF630erm_02684	ybeY	endoribonuclease YbeY	0.00239339	0.00226171	0.00259727	#N/A	#N/A	#N/A	0.00180485	0.00164441	0.00338803	0.00150831	0.00131622	0.00132248	0.00329548	0.00650882	0.00367618
CDIF630erm_02695	prmA	ribosomal protein L11 methyltransferase	0.00151777	0.0012467	0.00147299	#N/A	#N/A	#N/A	0.00136791	0.00283171	0.00252688	0.001239	0.00132181	0.00232098	0.00258864	0.00233244	0.00500724
CDIF630erm_02699		hypothetical protein	0.00181714	0.00120396	0.00292341	#N/A	#N/A	#N/A	0.00171338	0.0015731	0.0024473	0.0101414	0.00126434	0.00204957	0.00243386	0.00545507	0.0147949
CDIF630erm_02738	pmi	mannose-6-phosphate isomerase	0.00658187	0.00633145	0.00372813	#N/A	#N/A	#N/A	0.00526751	0.00821162	0.00821765	0.005143	0.00584172	0.00765964	0.0114278	0.00357022	0.00366373
CDIF630erm_02793	tcyP	putative L-cystine uptake protein	0.00848614	0.00902595	0.00768407	#N/A	#N/A	#N/A	0.00678023	0.00646784	0.0257079	0.0064335	0.00773282	0.0197284	0.00237506	0.0157362	0.00669749
CDIF630erm_02838	def2	peptide deformylase	0.0082165	0.0080427	0.0125425	#N/A	#N/A	#N/A	0.00636605	0.00487023	0.00948233	0.0104932	0.00694928	0.00575778	0.00466647	0.00502802	0.00688892
CDIF630erm_02912	rsmH	ribosomal RNA small subunit methyltransferase H	0.00078551	0.000977181	0.0010417	#N/A	#N/A	#N/A	0.0006618	0.00104302	0.000755136	0.000889365	0.000859727	0.000955737	0.00100118	0.00263118	0.020759
CDIF630erm_03059	cwp10	cell surface protein cwp10	0.00724419	0.00147869	0.00572888	#N/A	#N/A	#N/A	0.00473732	0.0102791	0.0034908	0.004073	0.00507507	0.00231261	0.000789342	0.00442878	0.00158894
CDIF630erm_03069	queA	S-adenosylmethionine:tRNA ribosyltransferase-isomerase	0.00158545	0.00255016	0.00121096	#N/A	#N/A	#N/A	0.000500411	0.00115807	0.00126644	0.00285599	0.0024278	0.00182088	0.00145453	0.00819754	0.00113047
CDIF630erm_03245		uncharacterized protein	0.00566116	0.00096148	0.00392069	#N/A	#N/A	#N/A	0.00232097	0.00573016	0.00271597	0.00429323	0.0125125	0.00134385	0.0204517	0.00231181	0.00219811
CDIF630erm_03300		PTS system, mannose-specific IIA component	0.00228955	0.00263117	0.00216534	#N/A	#N/A	#N/A	0.00226239	0.0028505	0.0025143	0.00219301	0.00580351	0.00208728	0.0103371	0.00636846	0.00605928
CDIF630erm_03355		hypothetical protein	0.00323283	0.00264165	0.003412	#N/A	#N/A	#N/A	0.00203616	0.00272083	0.00373111	0.00222184	0.0039961	0.00328781	0.00386279	0.00674235	0.00315188
CDIF630erm_03387		PTS system, glucose-like IIA component	0.00633765	0.00565205	0.00642484	#N/A	#N/A	#N/A	0.00696417	0.00417492	0.00315865	0.0050964	0.00765499	0.00426853	0.00309166	0.00323756	0.00580382
CDIF630erm_03476	dpaL2	diaminopropionate ammonia-lyase	0.000816498	0.00107117	0.00133966	#N/A	#N/A	#N/A	0.000865127	0.00291552	0.00080007	0.0011439	0.000944086	0.00156493	0.000850489	0.00261918	0.000795266
CDIF630erm_03535	prdE	proline reductase PrdE subunit	0.00240689	0.000945659	0.000922873	#N/A	#N/A	#N/A	0.0033863	0.00111558	0.000933369	0.0314592	0.0017667	0.000468908	0.00451408	0.00245785	0.00379982
CDIF630erm_03611		putative D-isomer specific 2-hydroxyacid dehydrogenase	0.00433595	0.00285298	0.00133052	#N/A	#N/A	#N/A	0.0013621	0.00315498	0.0041732	0.00316283	0.00209548	0.00195896	0.0017661	0.00254626	0.00236191
CDIF630erm_03698	rumA	23S rRNA (uracil-5-)-methyltransferase RumA	0.00198593	0.00102261	0.00218466	#N/A	#N/A	#N/A	0.00162302	0.000992582	0.00262349	0.00129926	0.00136226	0.0020051	0.00205334	0.00140374	0.00156639
CDIF630erm_03733	cbiG	cobalt-precorrin 5A hydrolase	0.000636716	0.00617339	0.00445749	#N/A	#N/A	#N/A	0.00525834	0.00656126	0.0014071	0.00807364	0.00409949	0.00139876	0.0005982	0.000776477	0.00339907
CDIF630erm_03792	ywlE	protein-arginine-phosphatase	0.0012644	0.00124322	0.00268082	#N/A	#N/A	#N/A	0.00206912	0.0027052	0.00256082	0.00200923	0.00154673	0.00131698	0.000842085	0.00396621	0.00348811
CDIF630erm_03815	pth	peptidyl-tRNA hydrolase	0.00328433	0.00229055	0.00212633	#N/A	#N/A	#N/A	0.00269176	0.00271413	0.00197796	0.00382288	0.00189099	0.00292619	0.00237644	0.00165589	0.00312004
CDIF630erm_03818	pilT	twitching motility protein PilT	0.00120733	0.000981303	0.000807563	#N/A	#N/A	#N/A	0.00167933	0.000808179	0.00156327	0.00117604	0.00127389	0.00149999	0.00246837	0.00188036	0.00354169
CDIF630erm_03966	dgaE	D-glucosaminate-6-phosphate ammonia lyase	0.00283385	0.00714296	0.00130312	#N/A	#N/A	#N/A	0.000959344	0.00183034	0.000949251	0.0159401	0.00311559	0.00354074	0.00132029	0.000940706	0.000246579
CDIF630erm_01147	nagB	glucosamine-6-phosphate deaminase	0.0012242	0.00237424	0.00237729	#N/A	#N/A	#N/A	0.00189402	0.00453905	0.0124256	0.00478687	0.00290386	0.00575087	#N/A	#N/A	#N/A
CDIF630erm_01489		putative phage tyrosine recombinase	0.00191367	0.00150616	0.001955	#N/A	#N/A	#N/A	0.00176132	0.00171944	0.00267799	0.00165048	0.00106876	0.00224832	#N/A	#N/A	#N/A
CDIF630erm_01788		putative amidohydrolase	0.000907067	0.000358175	0.00147944	#N/A	#N/A	#N/A	0.000870903	0.000709834	0.00177033	0.00165675	0.00201314	0.0020696	#N/A	#N/A	#N/A
CDIF630erm_02043		two-component sensor histidine kinase	0.00466014	0.00512465	0.00315176	#N/A	#N/A	#N/A	0.00810413	0.00554858	0.0119924	0.0036769	0.00637466	0.00594401	#N/A	#N/A	#N/A
CDIF630erm_02509	topB	DNA topoisomerase III	0.00506138	0.00793039	0.00535121	#N/A	#N/A	#N/A	0.00490167	0.00628622	0.00787738	0.0132403	0.00660543	0.00586396	#N/A	#N/A	#N/A
CDIF630erm_02730	apbE	FAD:protein FMN transferase	0.00160728	0.00171219	0.0019796	#N/A	#N/A	#N/A	0.00226677	0.00582755	0.00150793	0.00171822	0.00106227	0.000602579	#N/A	#N/A	#N/A
CDIF630erm_03735	cbiT	cobalt-precorrin-6B (C15)- methyltransferase [decarboxylating]	0.00197151	0.00163179	0.00230091	#N/A	#N/A	#N/A	0.000990441	0.000303188	0.00212328	0.00222478	0.00106238	0.0058815	#N/A	#N/A	#N/A
CDIF630erm_03978	dnaI	helicase loader ATPase, dnaI	0.00189511	0.00139142	0.00133321	#N/A	#N/A	#N/A	0.00152783	0.00117302	0.00199863	0.00286511	0.0012315	0.000834209	#N/A	#N/A	#N/A
CDIF630erm_00351	flgM	negative regulator of flagellin synthesis (anti-sigma-d factor)	0.00188409	0.00392986	0.00258098	#N/A	#N/A	#N/A	0.0018432	0.00431551	0.00161293	0.00951707	0.011345	0.0113176	0.00244075	0.00368902	0.00400233
CDIF630erm_00956		putative nitroreductase-like oxidoreductase	0.00192539	0.00122641	0.00146175	#N/A	#N/A	#N/A	0.000242826	0.000892733	0.00103941	0.000483639	0.00111865	0.000589106	0.00209704	0.00129541	0.000377011
CDIF630erm_01381		putative lipoprotein	0.00373854	0.00544296	0.00244169	#N/A	#N/A	#N/A	0.0034949	0.0025423	0.00137278	0.00223973	0.000539697	0.000892545	0.00114897	0.00725383	0.00487194
CDIF630erm_01982	truA2	tRNA pseudouridine synthase A	0.00105267	0.000988906	0.000676495	#N/A	#N/A	#N/A	0.000571513	0.000961316	0.000233777	0.00119237	0.00100395	0.000786872	0.00122363	0.00037909	0.000459004
CDIF630erm_02249	racX	putative aspartate racemase RacX	0.00078223	0.000930765	0.00196542	#N/A	#N/A	#N/A	0.00133855	0.000871823	0.00121305	0.00183529	0.00109839	0.0010686	0.00179214	0.00124317	0.00194524
CDIF630erm_02570	mtlD	mannitol-1-phosphate 5-dehydrogenase	0.00110821	0.00290433	0.00183781	#N/A	#N/A	#N/A	0.0017866	0.00204853	0.00240873	0.00194975	0.00143069	0.00112817	0.00409119	0.00580311	0.00160656
CDIF630erm_02599		putative hydrolase, HAD superfamily, subfamily IIB	0.000507693	0.0121477	0.000979255	#N/A	#N/A	#N/A	0.00620222	0.0012597	0.000683693	0.00171598	0.000737389	0.000829787	0.00364864	0.0022802	0.00174684
CDIF630erm_02734		PTS system, fructose-like IIB component	0.00400558	0.00308738	0.00520616	#N/A	#N/A	#N/A	0.0089633	0.00814135	0.00752523	0.00306316	0.00219613	0.00568018	0.00324458	0.00183668	0.00384331
CDIF630erm_03280		pentapeptide repeat protein	0.000264648	0.000536487	0.0012251	#N/A	#N/A	#N/A	0.00175284	0.000686004	0.000923834	0.000481389	0.000901336	0.000916578	0.000555219	0.000664936	0.00177677
CDIF630erm_03844		ABC-type transport system, iron-family ATP-binding protein	0.00180204	0.000959241	0.000830273	#N/A	#N/A	#N/A	0.00205622	0.00167445	0.00129157	0.00196501	0.00324477	0.00109467	0.00168276	0.00156659	0.00448211
CDIF630erm_03965		bifunctional 4-hydroxy-2-oxoglutarate aldolase / 2-dehydro-3-deoxyphosphogluconate aldolase	0.00128483	0.00175936	0.00127792	#N/A	#N/A	#N/A	0.00176151	0.00141607	0.000562767	0.000966573	0.000169201	0.00152646	0.00241738	0.00337804	0.00398574
CDIF630erm_00271	tsaD	tRNA N6-adenosine threonylcarbamoyltransferase	0.00226417	0.00248309	0.0019789	#N/A	#N/A	#N/A	0.000961843	0.00181015	0.0013772	0.00117091	0.00134537	0.00234458	#N/A	#N/A	#N/A
CDIF630erm_00287		putative peptidase, M20D family	0.0014612	0.00106624	0.00223465	#N/A	#N/A	#N/A	0.00255678	0.00169796	0.0016202	0.00284105	0.00250634	0.00563038	#N/A	#N/A	#N/A
CDIF630erm_00455	cbiO	ABC-type transport system, cobalt-specific ATP-binding protein	0.00251958	0.0013456	0.000895321	#N/A	#N/A	#N/A	0.00104543	0.000744317	0.00127075	0.000313129	0.000419245	0.000787663	#N/A	#N/A	#N/A
CDIF630erm_00856		2-aminoethylphosphonate--pyruvate transaminase	0.00359716	0.00495561	0.0037061	#N/A	#N/A	#N/A	0.00318309	0.00427379	0.00284825	0.0146939	0.00185245	0.00264372	#N/A	#N/A	#N/A
CDIF630erm_01374	pdp	pyrimidine-nucleoside phosphorylase	0.0029539	0.00126773	0.00271755	#N/A	#N/A	#N/A	0.00250937	0.00423865	0.00222637	0.00380682	0.00104297	0.00516736	#N/A	#N/A	#N/A
CDIF630erm_03709	cls2	cardiolipin synthase	0.00123477	0.0031872	0.00397571	#N/A	#N/A	#N/A	0.00270658	0.00239491	0.00343568	0.00323612	0.00235286	0.00374688	#N/A	#N/A	#N/A
CDIF630erm_00470		hypothetical protein	0.00419386	0.00718821	0.015135	#N/A	#N/A	#N/A	0.00279536	0.00333292	0.00524049	#N/A	#N/A	#N/A	0.00694738	0.00688736	0.0115758
CDIF630erm_00473	yjbM	GTP pyrophosphokinase YjbM	0.00120812	0.00218555	0.00152056	#N/A	#N/A	#N/A	0.00267786	0.00155032	0.00288261	#N/A	#N/A	#N/A	0.000962745	0.00106279	0.00227624
CDIF630erm_00910		IMPACT family member protein	0.00154216	0.00238632	0.0022584	#N/A	#N/A	#N/A	0.00176847	0.00135247	0.000835347	#N/A	#N/A	#N/A	0.00233206	0.00152392	0.000932404
CDIF630erm_01223		transcriptional regulator, LysR family	0.000813391	0.00209605	0.000485112	#N/A	#N/A	#N/A	0.00125257	0.00612065	0.000436299	#N/A	#N/A	#N/A	0.00129323	0.00105167	0.000875687
CDIF630erm_01307	rng	ribonuclease G	0.00272226	0.0159028	0.00190563	#N/A	#N/A	#N/A	0.00988352	0.00293693	0.000210343	#N/A	#N/A	#N/A	0.00502504	0.00330783	0.00452975
CDIF630erm_01399		uncharacterized protein	0.00888186	0.00416825	0.00232708	#N/A	#N/A	#N/A	0.00801875	0.00472725	0.00460165	#N/A	#N/A	#N/A	0.00520317	0.00678103	0.00766643
CDIF630erm_02606		hypothetical protein	0.00103237	0.00111241	0.000723412	#N/A	#N/A	#N/A	0.00142938	0.000995291	0.00136338	#N/A	#N/A	#N/A	0.00254428	0.00208637	0.00274883
CDIF630erm_02948	sstT	putative serine / threonine transporter SstT	0.00699092	0.00658953	0.00854988	#N/A	#N/A	#N/A	0.00830589	0.00620441	0.0124405	#N/A	#N/A	#N/A	0.00334418	0.00376833	0.00735956
CDIF630erm_03033		putative glycosyl transferase, group 1	0.00109074	0.00174586	0.00101372	#N/A	#N/A	#N/A	0.0035828	0.00174609	0.00165594	#N/A	#N/A	#N/A	0.00523881	0.00329384	0.00160587
CDIF630erm_03147		hypothetical protein	0.00314298	0.00334699	0.00505985	#N/A	#N/A	#N/A	0.00471913	0.00329868	0.00284586	#N/A	#N/A	#N/A	0.0017416	0.010951	0.00189958
CDIF630erm_03421	bglA5	6-phospho-beta-glucosidase	0.00153761	0.000435806	0.00168107	#N/A	#N/A	#N/A	0.00219939	0.00188852	0.0030676	#N/A	#N/A	#N/A	0.0011984	0.00176705	0.00234777
CDIF630erm_03461	secG	protein-export membrane protein SecG	0.0233127	0.00723866	0.0324143	#N/A	#N/A	#N/A	0.0104711	0.0130786	0.0209675	#N/A	#N/A	#N/A	0.00220029	0.0131399	0.0152752
CDIF630erm_03716	uvrA	excinuclease ABC subunit A	0.00386798	0.00424621	0.00336276	#N/A	#N/A	#N/A	0.00185268	0.00193852	0.00220711	#N/A	#N/A	#N/A	0.00513079	0.00269123	0.000969719
CDIF630erm_03784	atpE2	ATP synthase subunit c	0.0145163	0.0234175	0.0159567	#N/A	#N/A	#N/A	0.0289297	0.0244308	0.0203853	#N/A	#N/A	#N/A	0.00399017	0.0138604	0.0134653
CDIF630erm_03865	tmk	thymidylate kinase	0.00318214	0.00189176	0.00145749	#N/A	#N/A	#N/A	0.00199498	0.00249097	0.00310705	#N/A	#N/A	#N/A	0.00458136	0.00187262	0.00390389
CDIF630erm_00880	srlR	transcription antiterminator, PTS operon regulator	0.00110256	0.00112761	0.00205328	#N/A	#N/A	#N/A	0.00110132	0.00165097	0.00137423	#N/A	#N/A	#N/A	#N/A	#N/A	#N/A
CDIF630erm_01129		putative thioesterase	0.00295895	0.000262807	0.00208149	#N/A	#N/A	#N/A	0.00533808	0.00346695	0.00443088	#N/A	#N/A	#N/A	#N/A	#N/A	#N/A
CDIF630erm_01502		putative membrane protein	0.000935053	0.00335726	0.00176003	#N/A	#N/A	#N/A	0.00166189	0.00197109	0.000871517	#N/A	#N/A	#N/A	#N/A	#N/A	#N/A
CDIF630erm_01815		hypothetical protein	0.00705575	0.00450453	0.00763403	#N/A	#N/A	#N/A	0.00379733	0.0010426	0.00268442	#N/A	#N/A	#N/A	#N/A	#N/A	#N/A
CDIF630erm_01879		hypothetical protein	0.00171315	0.00195052	0.00149966	#N/A	#N/A	#N/A	0.00269291	0.00352119	0.00156017	#N/A	#N/A	#N/A	#N/A	#N/A	#N/A
CDIF630erm_02122	eutK	ethanolamine carboxysome strutural protein	0.00183809	0.00144919	0.000744976	#N/A	#N/A	#N/A	0.00225527	0.00154859	0.000368466	#N/A	#N/A	#N/A	#N/A	#N/A	#N/A
CDIF630erm_02402		putative regulatory protein	0.000700234	0.000740834	0.000316902	#N/A	#N/A	#N/A	0.000724231	0.000337968	0.00708334	#N/A	#N/A	#N/A	#N/A	#N/A	#N/A
CDIF630erm_03529		putative sigma-54 interacting protein	0.00450988	0.00779273	0.00380551	#N/A	#N/A	#N/A	0.00502299	0.00512535	0.00799012	#N/A	#N/A	#N/A	#N/A	#N/A	#N/A
CDIF630erm_00652	cheA	chemotaxis protein CheA	0.00313408	0.000880858	0.00491507	#N/A	#N/A	#N/A	0.00299773	0.0140256	0.00349063	#N/A	#N/A	#N/A	0.00704207	0.000410969	0.00596382
CDIF630erm_00671	glsA	glutaminase	0.00158602	0.000805536	0.000413816	#N/A	#N/A	#N/A	0.000734196	0.000336527	0.000482032	#N/A	#N/A	#N/A	0.000547482	0.000522931	0.00114053
CDIF630erm_00825	ybbK	uncharacterized protein YbbK	0.00250751	0.00184991	0.00112786	#N/A	#N/A	#N/A	0.00312016	0.00207371	0.00388629	#N/A	#N/A	#N/A	0.000515463	0.00170573	0.00395861
CDIF630erm_01033		putative phage protein	0.00230298	0.00165135	0.0026265	#N/A	#N/A	#N/A	0.0033312	0.000938827	0.00176219	#N/A	#N/A	#N/A	0.00423547	0.0022941	0.00239815
CDIF630erm_01695		ABC-type transport system, permease	0.0015768	9.95983e-05	0.00148033	#N/A	#N/A	#N/A	0.00165272	0.00425044	0.00170544	#N/A	#N/A	#N/A	0.00139579	0.00127338	0.000662757
CDIF630erm_01718	hisC1	histidinol-phosphate aminotransferase	0.00202406	0.00375276	0.00158708	#N/A	#N/A	#N/A	0.00317983	0.00500023	0.0017872	#N/A	#N/A	#N/A	0.00224511	0.00310023	0.00113024
CDIF630erm_02063		putative conjugative transposon protein, YhcG-like	0.00731603	0.00248917	0.00386285	#N/A	#N/A	#N/A	0.0029479	0.00533321	0.00663175	#N/A	#N/A	#N/A	0.00306527	0.00672886	0.00588094
CDIF630erm_02352		putative multiprotein-complex assembly TPR repeat-containing protein	0.00268817	0.00342541	0.00478518	#N/A	#N/A	#N/A	0.00249314	0.00375081	0.00387528	#N/A	#N/A	#N/A	0.00351054	0.000860069	0.00521352
CDIF630erm_02594	grdE	glycine reductase complex, component B subunits alpha and beta (Selenoprotein PB alpha / beta)	0.00406729	0.00537505	0.00271946	#N/A	#N/A	#N/A	0.00538751	0.0031933	0.00218011	#N/A	#N/A	#N/A	0.00205178	0.00395972	0.00378828
CDIF630erm_02595	trxA2	thioredoxin	0.00334858	0.0006852	0.00194336	#N/A	#N/A	#N/A	0.000926017	0.00348916	0.000828582	#N/A	#N/A	#N/A	0.00466577	0.00280263	0.00210841
CDIF630erm_00610	spaK	two-component sensor histidine kinase	0.00395378	0.00187728	0.0022144	#N/A	#N/A	#N/A	0.00109645	0.00412213	0.00191829	#N/A	#N/A	#N/A	#N/A	#N/A	#N/A
CDIF630erm_00806		transcriptional regulator, MerR family	0.000755945	0.00243292	0.00086789	#N/A	#N/A	#N/A	0.000620295	0.00235308	0.00102668	#N/A	#N/A	#N/A	#N/A	#N/A	#N/A
CDIF630erm_00837	metV	putative electron bifurcating methylenetetrahydrofolate reductase, small subunit	0.00143762	0.00170992	0.00123284	#N/A	#N/A	#N/A	0.00170835	0.0021045	0.00279968	#N/A	#N/A	#N/A	#N/A	#N/A	#N/A
CDIF630erm_01225	moeA	molybdopterin molybdotransferase	0.000717811	0.00129375	0.00341358	#N/A	#N/A	#N/A	0.00178368	0.000378319	0.000817965	#N/A	#N/A	#N/A	#N/A	#N/A	#N/A
CDIF630erm_01437		uncharacterized protein, UPF0297 family	0.00078881	0.00149711	0.000734022	#N/A	#N/A	#N/A	0.00179331	0.000993518	0.00173029	#N/A	#N/A	#N/A	#N/A	#N/A	#N/A
CDIF630erm_01622	wrbA	putative flavodoxin protein	0.00139369	0.00132526	0.00236	#N/A	#N/A	#N/A	0.00180244	0.00228978	0.00176355	#N/A	#N/A	#N/A	#N/A	#N/A	#N/A
CDIF630erm_02041	tyrC	prephenate dehydrogenase	0.00141492	0.00053636	0.000586626	#N/A	#N/A	#N/A	0.000562253	0.00156623	0.00177722	#N/A	#N/A	#N/A	#N/A	#N/A	#N/A
CDIF630erm_02121	eutE	ethanolamine acetaldehyde oxidoreductase	0.00107916	0.00159998	0.00221873	#N/A	#N/A	#N/A	0.00115954	0.00154659	0.00127838	#N/A	#N/A	#N/A	#N/A	#N/A	#N/A
CDIF630erm_02139	spoVS	stage V sporulation protein S	0.00108814	0.00177966	0.000910804	#N/A	#N/A	#N/A	0.000586976	0.00101576	0.00131314	#N/A	#N/A	#N/A	#N/A	#N/A	#N/A
CDIF630erm_02336		transcriptional regulator, DeoR family	0.000324877	0.00132194	0.000567853	#N/A	#N/A	#N/A	0.00122753	0.00103314	0.00069495	#N/A	#N/A	#N/A	#N/A	#N/A	#N/A
CDIF630erm_02697		putative CRISPR-associated protein	0.00184761	0.000751158	0.00469108	#N/A	#N/A	#N/A	0.00076833	0.00153457	0.000785439	#N/A	#N/A	#N/A	#N/A	#N/A	#N/A
CDIF630erm_02875		uncharacterized protein	0.00138253	0.00105963	0.00138212	#N/A	#N/A	#N/A	0.00443375	0.00345465	0.00103048	#N/A	#N/A	#N/A	#N/A	#N/A	#N/A
CDIF630erm_02995		putative pyridoxal phosphate-dependent transferase	0.000793214	0.00125761	0.00611212	#N/A	#N/A	#N/A	0.000873693	0.00181689	0.00159064	#N/A	#N/A	#N/A	#N/A	#N/A	#N/A
CDIF630erm_03502		transcriptional regulator, MarR family	0.00736446	0.00457038	0.00475905	#N/A	#N/A	#N/A	0.00424686	0.00212815	0.00481126	#N/A	#N/A	#N/A	#N/A	#N/A	#N/A
CDIF630erm_03536	prdD	proline reductase PrdD subunit	0.00322974	0.00250748	0.00302571	#N/A	#N/A	#N/A	0.000894241	0.00162905	0.00537044	#N/A	#N/A	#N/A	#N/A	#N/A	#N/A
CDIF630erm_03550	folC	folylpolyglutamate synthase	0.00607913	0.0036122	0.00264259	#N/A	#N/A	#N/A	0.0139973	0.00649387	0.00209473	#N/A	#N/A	#N/A	#N/A	#N/A	#N/A
CDIF630erm_03657		putative protease / amidase	0.00252242	0.00105598	0.00119453	#N/A	#N/A	#N/A	0.00139805	0.00328786	0.00326097	#N/A	#N/A	#N/A	#N/A	#N/A	#N/A
CDIF630erm_03814	mfd	transcription-repair coupling factor	0.00121607	0.00596929	0.00111152	#N/A	#N/A	#N/A	0.00558189	0.00379236	0.00311107	#N/A	#N/A	#N/A	#N/A	#N/A	#N/A
CDIF630erm_00376	fliK	flagellar hook-length control protein FliK	0.00186318	0.000726281	0.00547429	#N/A	#N/A	#N/A	#N/A	#N/A	#N/A	0.00412709	0.00618588	0.00430104	0.00208137	0.00277889	0.00267344
CDIF630erm_00627	dacF1	serine-type D-ala-D-ala carboxypeptidase	0.00982159	0.00146293	0.00373374	#N/A	#N/A	#N/A	#N/A	#N/A	#N/A	0.000937875	0.00117925	0.00213337	0.00384156	0.00425609	0.00205736
CDIF630erm_00633		two-component response regulator	0.00579077	0.00133781	0.00341995	#N/A	#N/A	#N/A	#N/A	#N/A	#N/A	0.00346608	0.00192577	0.000684399	0.0122994	0.00130731	0.0015904
CDIF630erm_01565	pqqD	putative coenzyme PQQ synthesis protein D	0.00284693	0.00181307	0.00747383	#N/A	#N/A	#N/A	#N/A	#N/A	#N/A	0.00366219	0.00682446	0.00204872	0.00311925	0.00189581	0.00294324
CDIF630erm_01903		molybdenum cofactor sulfurase	0.00126928	0.000596703	0.00164956	#N/A	#N/A	#N/A	#N/A	#N/A	#N/A	0.00317562	0.00187607	0.000484908	0.00496139	0.00411231	0.00443376
CDIF630erm_02682	cdd1	cytidine deaminase	0.00114738	0.00159552	0.00333063	#N/A	#N/A	#N/A	#N/A	#N/A	#N/A	0.00135235	0.00361136	0.00139707	0.00168494	0.00159002	0.00180907
CDIF630erm_03776		putative CBS domain protein	0.00293269	0.00507168	0.00373002	#N/A	#N/A	#N/A	#N/A	#N/A	#N/A	0.00203342	0.00276161	0.00126534	0.00166553	0.00304918	0.00571471
CDIF630erm_03804	gppA	guanosine-5*-triphosphate, 3*-diphosphate pyrophosphatase	0.000589088	0.000650346	0.00961404	#N/A	#N/A	#N/A	#N/A	#N/A	#N/A	0.000181915	0.000888837	0.00195015	0.000505099	0.00840012	0.00354282
CDIF630erm_01411		ribosome biogenesis GTPase A	0.00524002	0.00393286	0.00920092	#N/A	#N/A	#N/A	#N/A	#N/A	#N/A	0.000984334	0.000925191	0.00357195	#N/A	#N/A	#N/A
CDIF630erm_01770	map2	methionine aminopeptidase	0.00266473	0.00243858	0.0011004	#N/A	#N/A	#N/A	#N/A	#N/A	#N/A	0.00318151	0.00215894	0.00125298	#N/A	#N/A	#N/A
CDIF630erm_02331	pbuG	adenine / guanine / hypoxanthine permease	0.00182033	0.00192997	0.00255259	#N/A	#N/A	#N/A	#N/A	#N/A	#N/A	0.00226243	0.00768091	0.00258982	#N/A	#N/A	#N/A
CDIF630erm_02250		putative lipoprotein	0.00165222	0.00156478	0.00186462	#N/A	#N/A	#N/A	#N/A	#N/A	#N/A	0.00169865	0.00273628	0.00135621	0.00181668	0.00113221	0.0027465
CDIF630erm_02461		uncharacterized protein	0.00147749	0.0018959	0.00107244	#N/A	#N/A	#N/A	#N/A	#N/A	#N/A	0.000359509	0.00144639	0.00123561	0.00474511	0.00114404	0.0014993
CDIF630erm_03090		putative oxidoreductase (fad-binding domain)	0.0002384	0.00282795	0.00109021	#N/A	#N/A	#N/A	#N/A	#N/A	#N/A	0.000994168	0.00277147	0.000890441	0.0013444	0.000449313	0.00292947
CDIF630erm_03480		uncharacterized protein	0.000513812	0.00155256	0.00056492	#N/A	#N/A	#N/A	#N/A	#N/A	#N/A	0.00175738	0.00110237	0.000713025	0.00104225	0.00154892	0.00148444
CDIF630erm_03924	ttcA2	putative 2-thiocytidine tRNA biosynthesis protein TtcA	0.00110708	0.0012186	0.00128206	#N/A	#N/A	#N/A	#N/A	#N/A	#N/A	0.00195134	0.00294932	0.000881606	0.00454717	0.0027877	0.00118495
CDIF630erm_00695		putative PEP-utilizing enzyme	0.00130308	0.00292361	0.000942094	#N/A	#N/A	#N/A	#N/A	#N/A	#N/A	0.0021915	0.000982447	0.00296358	#N/A	#N/A	#N/A
CDIF630erm_01358	recN	DNA repair protein RecN	0.00431609	0.00542591	0.00183633	#N/A	#N/A	#N/A	#N/A	#N/A	#N/A	0.00252218	0.00193381	0.00174552	#N/A	#N/A	#N/A
CDIF630erm_02680		putative divalent cation transporter, MgtE family	0.00150453	0.00130737	0.001024	#N/A	#N/A	#N/A	#N/A	#N/A	#N/A	0.00151642	0.00248861	0.00150642	#N/A	#N/A	#N/A
CDIF630erm_00816		putative cell-division protein	0.0025199	0.000907416	0.000385442	#N/A	#N/A	#N/A	#N/A	#N/A	#N/A	#N/A	#N/A	#N/A	0.00205944	0.00248778	0.00161289
CDIF630erm_00864		putative lipoprotein	0.00146134	0.00190048	0.00103271	#N/A	#N/A	#N/A	#N/A	#N/A	#N/A	#N/A	#N/A	#N/A	0.000904616	0.0019747	0.00257373
CDIF630erm_01279	copZ	copper chaperone CopZ	0.00118103	0.0011806	0.00200019	#N/A	#N/A	#N/A	#N/A	#N/A	#N/A	#N/A	#N/A	#N/A	0.00216544	0.00197084	0.00134528
CDIF630erm_01871		transcriptional regulator, repressor-like	0.00186812	0.00146234	0.00185327	#N/A	#N/A	#N/A	#N/A	#N/A	#N/A	#N/A	#N/A	#N/A	0.00145448	0.00208817	0.00201285
CDIF630erm_02468		transcriptional regulator, RpiR family	0.00114416	0.00280797	0.000989281	#N/A	#N/A	#N/A	#N/A	#N/A	#N/A	#N/A	#N/A	#N/A	0.000849439	0.00352141	0.000764694
CDIF630erm_03268		ABC-type transport system, permease	0.00213263	0.00355569	0.00121746	#N/A	#N/A	#N/A	#N/A	#N/A	#N/A	#N/A	#N/A	#N/A	0.000670115	0.00414903	0.00122761
CDIF630erm_03701	dnaE	DNA polymerase III DnaE subunit alpha	0.00639554	0.00126257	0.00748207	#N/A	#N/A	#N/A	#N/A	#N/A	#N/A	#N/A	#N/A	#N/A	0.00462219	0.00362588	0.0040609
CDIF630erm_03955		uncharacterizd isochorismatase-like protein	0.000983424	0.00380016	0.000866389	#N/A	#N/A	#N/A	#N/A	#N/A	#N/A	#N/A	#N/A	#N/A	0.00138027	0.00116451	0.0014722
CDIF630erm_00387	flhA	flagellar biosynthesis protein FlhA	0.000748224	0.00207939	0.00130618	#N/A	#N/A	#N/A	#N/A	#N/A	#N/A	#N/A	#N/A	#N/A	#N/A	#N/A	#N/A
CDIF630erm_00468		uncharacterized protein	0.00156066	0.01381	0.00895492	#N/A	#N/A	#N/A	#N/A	#N/A	#N/A	#N/A	#N/A	#N/A	#N/A	#N/A	#N/A
CDIF630erm_00636		putative transcriptional regulator	0.0059441	0.00333343	0.00281476	#N/A	#N/A	#N/A	#N/A	#N/A	#N/A	#N/A	#N/A	#N/A	#N/A	#N/A	#N/A
CDIF630erm_00801		DNA-binding protein	0.000794107	0.0012274	0.00112359	#N/A	#N/A	#N/A	#N/A	#N/A	#N/A	#N/A	#N/A	#N/A	#N/A	#N/A	#N/A
CDIF630erm_00846		ATP-dependent reductive activator of CoFeSP	0.00497154	0.00523893	0.00178257	#N/A	#N/A	#N/A	#N/A	#N/A	#N/A	#N/A	#N/A	#N/A	#N/A	#N/A	#N/A
CDIF630erm_01417		uncharacterized protein	0.00358489	0.00126928	0.00203464	#N/A	#N/A	#N/A	#N/A	#N/A	#N/A	#N/A	#N/A	#N/A	#N/A	#N/A	#N/A
CDIF630erm_01508	cprK	two-component sensor histidine kinase	0.000259885	0.00100323	0.00253732	#N/A	#N/A	#N/A	#N/A	#N/A	#N/A	#N/A	#N/A	#N/A	#N/A	#N/A	#N/A
CDIF630erm_02017	plsC2	putative 1-acyl-sn-glycerol-3-phosphate acyltransferase	0.00132445	0.00148369	0.000913733	#N/A	#N/A	#N/A	#N/A	#N/A	#N/A	#N/A	#N/A	#N/A	#N/A	#N/A	#N/A
CDIF630erm_02986		putative polysaccharide deacetylase	0.00392512	0.00159624	0.000834092	#N/A	#N/A	#N/A	#N/A	#N/A	#N/A	#N/A	#N/A	#N/A	#N/A	#N/A	#N/A
CDIF630erm_03305		hypothetical protein	0.0301482	0.0286469	0.0439028	#N/A	#N/A	#N/A	#N/A	#N/A	#N/A	#N/A	#N/A	#N/A	#N/A	#N/A	#N/A
CDIF630erm_03648		beta-lactamase-like protein	0.00116852	0.00178798	0.00120606	#N/A	#N/A	#N/A	#N/A	#N/A	#N/A	#N/A	#N/A	#N/A	#N/A	#N/A	#N/A
CDIF630erm_00390	fliA	RNA polymerase sigma-28factor for flagellar operon	0.00176012	0.0010893	0.00241039	#N/A	#N/A	#N/A	#N/A	#N/A	#N/A	#N/A	#N/A	#N/A	0.00113714	0.00146654	0.00105944
CDIF630erm_00414		putative L-2-amino-thiazoline-4-carboxylic acid hydrolase	0.00530338	0.00350989	0.00365265	#N/A	#N/A	#N/A	#N/A	#N/A	#N/A	#N/A	#N/A	#N/A	0.00149435	0.00145145	0.00126656
CDIF630erm_00651		putative methyl-accepting chemotaxis receptor, MCP family	0.00116408	0.000908902	0.00288969	#N/A	#N/A	#N/A	#N/A	#N/A	#N/A	#N/A	#N/A	#N/A	0.00213875	0.00189168	0.000609112
CDIF630erm_00659		putative membrane protein	0.00154042	0.0014945	0.00176327	#N/A	#N/A	#N/A	#N/A	#N/A	#N/A	#N/A	#N/A	#N/A	0.00123896	0.00159262	0.00183094
CDIF630erm_01357	yqxC	putative rRNA methyltransferase	0.00585142	0.00114884	0.00400338	#N/A	#N/A	#N/A	#N/A	#N/A	#N/A	#N/A	#N/A	#N/A	0.00145864	0.0113782	0.00258357
CDIF630erm_01663	sigA2	RNA polymerase sigma factor SigA2 (sigma-43)	0.00100377	0.000366295	0.0013586	#N/A	#N/A	#N/A	#N/A	#N/A	#N/A	#N/A	#N/A	#N/A	0.000830311	0.00140387	0.00124585
CDIF630erm_01861	pcp	pyrrolidone-carboxylate peptidase	0.000630044	0.00100996	0.00109637	#N/A	#N/A	#N/A	#N/A	#N/A	#N/A	#N/A	#N/A	#N/A	0.00217394	0.000529227	0.00164212
CDIF630erm_02037	aroC	chorismate synthase	0.00662386	0.00542564	0.00556188	#N/A	#N/A	#N/A	#N/A	#N/A	#N/A	#N/A	#N/A	#N/A	0.00257292	0.00761413	0.00517553
CDIF630erm_02307	ylmB	putative N-formyl-4-amino-5-aminomethyl-2-methylpyrimidine deformylase	0.000367911	0.00078634	0.00221553	#N/A	#N/A	#N/A	#N/A	#N/A	#N/A	#N/A	#N/A	#N/A	0.000814396	0.000583302	0.00153846
CDIF630erm_03434		DNA helicase	0.00204702	0.00153086	0.0130253	#N/A	#N/A	#N/A	#N/A	#N/A	#N/A	#N/A	#N/A	#N/A	0.00587353	0.00275971	0.0017539
CDIF630erm_03713	mitS	DNA mismatch repair protein MutS	0.000681462	0.00207065	0.00154421	#N/A	#N/A	#N/A	#N/A	#N/A	#N/A	#N/A	#N/A	#N/A	0.00155216	0.00172044	0.000924435
CDIF630erm_00251		transcription antiterminator, PTS operon regulator	0.0010603	0.00112868	0.00120908	#N/A	#N/A	#N/A	#N/A	#N/A	#N/A	#N/A	#N/A	#N/A	#N/A	#N/A	#N/A
CDIF630erm_00258	cutC	copper homeostasis protein	0.0102159	0.00153328	0.00559957	#N/A	#N/A	#N/A	#N/A	#N/A	#N/A	#N/A	#N/A	#N/A	#N/A	#N/A	#N/A
CDIF630erm_00349		hypothetical protein	0.00120203	0.000700305	0.00204197	#N/A	#N/A	#N/A	#N/A	#N/A	#N/A	#N/A	#N/A	#N/A	#N/A	#N/A	#N/A
CDIF630erm_00709		uncharacterized protein, YbdM-like	0.000895937	0.000887677	0.000993326	#N/A	#N/A	#N/A	#N/A	#N/A	#N/A	#N/A	#N/A	#N/A	#N/A	#N/A	#N/A
CDIF630erm_00809		putative exported metalloendopeptidase	0.00327407	0.00173454	0.00160536	#N/A	#N/A	#N/A	#N/A	#N/A	#N/A	#N/A	#N/A	#N/A	#N/A	#N/A	#N/A
CDIF630erm_00873		putative cell surface protein	0.00225212	0.00354701	0.000639171	#N/A	#N/A	#N/A	#N/A	#N/A	#N/A	#N/A	#N/A	#N/A	#N/A	#N/A	#N/A
CDIF630erm_00957		putative DNA-binding protein	0.00182069	0.000583985	0.000826023	#N/A	#N/A	#N/A	#N/A	#N/A	#N/A	#N/A	#N/A	#N/A	#N/A	#N/A	#N/A
CDIF630erm_01006	amyB	amylopullulanase	0.00180687	0.00168229	0.0047652	#N/A	#N/A	#N/A	#N/A	#N/A	#N/A	#N/A	#N/A	#N/A	#N/A	#N/A	#N/A
CDIF630erm_01019	dinB	DNA polymerase IV (Pol IV)	0.00209517	0.00135278	0.000573675	#N/A	#N/A	#N/A	#N/A	#N/A	#N/A	#N/A	#N/A	#N/A	#N/A	#N/A	#N/A
CDIF630erm_01024		putative phage integrase	0.075347	0.00182768	0.000572504	#N/A	#N/A	#N/A	#N/A	#N/A	#N/A	#N/A	#N/A	#N/A	#N/A	#N/A	#N/A
CDIF630erm_01108		putative phage protein	0.00209262	0.00175764	0.00294621	#N/A	#N/A	#N/A	#N/A	#N/A	#N/A	#N/A	#N/A	#N/A	#N/A	#N/A	#N/A
CDIF630erm_01183	sbcC	nuclease SbcCD subunit C	0.0110254	0.019547	0.00890153	#N/A	#N/A	#N/A	#N/A	#N/A	#N/A	#N/A	#N/A	#N/A	#N/A	#N/A	#N/A
CDIF630erm_01277		putative lytic transglycosylase-like protein	0.000270856	0.000380872	0.000511169	#N/A	#N/A	#N/A	#N/A	#N/A	#N/A	#N/A	#N/A	#N/A	#N/A	#N/A	#N/A
CDIF630erm_01415	rnhB	ribonuclease HII	0.00222659	0.00255909	0.00178803	#N/A	#N/A	#N/A	#N/A	#N/A	#N/A	#N/A	#N/A	#N/A	#N/A	#N/A	#N/A
CDIF630erm_01486		putative DNA helicase, UvrD / REP type	0.00223426	0.00321434	0.00152032	#N/A	#N/A	#N/A	#N/A	#N/A	#N/A	#N/A	#N/A	#N/A	#N/A	#N/A	#N/A
CDIF630erm_01501		transcriptional regulator, PadR family	0.000692706	0.00134097	0.00230129	#N/A	#N/A	#N/A	#N/A	#N/A	#N/A	#N/A	#N/A	#N/A	#N/A	#N/A	#N/A
CDIF630erm_01532		putative beta-lactamase-inhibitor protein II	0.00533065	0.0137187	0.000815533	#N/A	#N/A	#N/A	#N/A	#N/A	#N/A	#N/A	#N/A	#N/A	#N/A	#N/A	#N/A
CDIF630erm_01680		uncharacterized protein	0.000651827	0.00314476	0.00262961	#N/A	#N/A	#N/A	#N/A	#N/A	#N/A	#N/A	#N/A	#N/A	#N/A	#N/A	#N/A
CDIF630erm_01923	mtbC	dimethylamine corrinoid protein	0.000358863	0.00239056	0.00015748	#N/A	#N/A	#N/A	#N/A	#N/A	#N/A	#N/A	#N/A	#N/A	#N/A	#N/A	#N/A
CDIF630erm_01967	ogt2	methylated-DNA--protein-cysteine methyltransferase	0.00096724	0.000491526	0.000151049	#N/A	#N/A	#N/A	#N/A	#N/A	#N/A	#N/A	#N/A	#N/A	#N/A	#N/A	#N/A
CDIF630erm_02079	vncR	two-component response regulator	0.00165002	0.000684789	0.00104005	#N/A	#N/A	#N/A	#N/A	#N/A	#N/A	#N/A	#N/A	#N/A	#N/A	#N/A	#N/A
CDIF630erm_02182	mutS	DNA mismatch repair protein MutS	0.00288228	0.00124157	0.00198131	#N/A	#N/A	#N/A	#N/A	#N/A	#N/A	#N/A	#N/A	#N/A	#N/A	#N/A	#N/A
CDIF630erm_02474	nanE	N-acetylmannosamine-6-phosphate 2-epimerase	0.000833975	0.000560607	0.000238897	#N/A	#N/A	#N/A	#N/A	#N/A	#N/A	#N/A	#N/A	#N/A	#N/A	#N/A	#N/A
CDIF630erm_02548	cspD	cold shock protein D	0.0036896	0.0044352	0.00124252	#N/A	#N/A	#N/A	#N/A	#N/A	#N/A	#N/A	#N/A	#N/A	#N/A	#N/A	#N/A
CDIF630erm_02658		transcription antiterminator, PTS operon regulator	0.0421985	0.00433866	0.0269179	#N/A	#N/A	#N/A	#N/A	#N/A	#N/A	#N/A	#N/A	#N/A	#N/A	#N/A	#N/A
CDIF630erm_02725	tcdA	tRNA threonylcarbamoyladenosine dehydratase	0.00152664	0.00537034	0.00143658	#N/A	#N/A	#N/A	#N/A	#N/A	#N/A	#N/A	#N/A	#N/A	#N/A	#N/A	#N/A
CDIF630erm_02824		two-component response regulator	0.00113755	0.00215434	0.00135178	#N/A	#N/A	#N/A	#N/A	#N/A	#N/A	#N/A	#N/A	#N/A	#N/A	#N/A	#N/A
CDIF630erm_02847		ABC-type transport system, pristinamycin / multidrug-family ATP-binding protein	0.00236432	0.00377251	0.00112234	#N/A	#N/A	#N/A	#N/A	#N/A	#N/A	#N/A	#N/A	#N/A	#N/A	#N/A	#N/A
CDIF630erm_03004	hemZ	coproporphyrinogen III oxidase	0.000781903	0.00102418	0.00326941	#N/A	#N/A	#N/A	#N/A	#N/A	#N/A	#N/A	#N/A	#N/A	#N/A	#N/A	#N/A
CDIF630erm_03015		hypothetical protein	0.00331808	0.000618564	0.000772483	#N/A	#N/A	#N/A	#N/A	#N/A	#N/A	#N/A	#N/A	#N/A	#N/A	#N/A	#N/A
CDIF630erm_03137		transcriptional regulator, sigma-54-dependent	0.0122527	0.0119976	0.00757539	#N/A	#N/A	#N/A	#N/A	#N/A	#N/A	#N/A	#N/A	#N/A	#N/A	#N/A	#N/A
CDIF630erm_03294		putative pyridine nucleotide-disulfide oxidoreductase, class I	0.0217135	0.00500975	0.00397355	#N/A	#N/A	#N/A	#N/A	#N/A	#N/A	#N/A	#N/A	#N/A	#N/A	#N/A	#N/A
CDIF630erm_03367	garK	glycerate kinase	0.00217778	0.00134595	0.00117899	#N/A	#N/A	#N/A	#N/A	#N/A	#N/A	#N/A	#N/A	#N/A	#N/A	#N/A	#N/A
CDIF630erm_03378	bglA3	6-phospho-beta-glucosidase	0.00170952	0.000871812	0.00197317	#N/A	#N/A	#N/A	#N/A	#N/A	#N/A	#N/A	#N/A	#N/A	#N/A	#N/A	#N/A
CDIF630erm_03483		putative oxidoreductase	0.00343282	0.0010923	0.00189903	#N/A	#N/A	#N/A	#N/A	#N/A	#N/A	#N/A	#N/A	#N/A	#N/A	#N/A	#N/A
CDIF630erm_03524		putative membrane protein	0.00115341	0.00237221	0.00273736	#N/A	#N/A	#N/A	#N/A	#N/A	#N/A	#N/A	#N/A	#N/A	#N/A	#N/A	#N/A
CDIF630erm_03761		putative oxidoreductase with NAD(P)-binding rossmann-fold domain	0.000358415	0.00119147	0.000829748	#N/A	#N/A	#N/A	#N/A	#N/A	#N/A	#N/A	#N/A	#N/A	#N/A	#N/A	#N/A
CDIF630erm_03796	prmC	release factor glutamine methyltransferase	0.0135863	0.0143694	0.00834767	#N/A	#N/A	#N/A	#N/A	#N/A	#N/A	#N/A	#N/A	#N/A	#N/A	#N/A	#N/A
CDIF630erm_03926		NAD dependent epimerase / dehydratase family protein	0.00214266	0.0015697	0.00232818	#N/A	#N/A	#N/A	#N/A	#N/A	#N/A	#N/A	#N/A	#N/A	#N/A	#N/A	#N/A
CDIF630erm_03944		pentapeptide repeat protein	0.0026501	0.00176721	0.000991754	#N/A	#N/A	#N/A	#N/A	#N/A	#N/A	#N/A	#N/A	#N/A	#N/A	#N/A	#N/A
CDIF630erm_00341	purC2	phosphoribosylaminoimidazole-succinocarboxamide synthase	#N/A	#N/A	#N/A	0.00952284	0.00415129	0.00270405	0.00181918	0.0022706	0.00360263	0.00305283	0.0012074	0.00145884	0.00233653	0.00169656	0.00223172
CDIF630erm_01602		putative TPR repeat-containing protein	#N/A	#N/A	#N/A	0.00303568	0.0103311	0.00221856	0.00159341	0.00163506	0.0047252	0.00197729	0.00444549	0.00350399	0.00162247	0.00124505	0.00293246
CDIF630erm_01972		ABC-type transport system, aminoacid-family extracellular solute-binding protein	#N/A	#N/A	#N/A	0.000653178	0.00296137	0.000726783	0.00211871	0.00163767	0.00280514	0.00185332	0.00134636	0.00180932	0.00117484	0.00181623	0.00195206
CDIF630erm_02027	metY	O-acetylhomoserine sulfhydrylase	#N/A	#N/A	#N/A	0.00370435	0.0034386	0.00128591	0.00156184	0.000329379	0.001204	0.0054949	0.00223212	0.00275318	0.00268541	0.002957	0.00121182
CDIF630erm_02318		putative cell division GTPase	#N/A	#N/A	#N/A	0.00106398	0.00148166	0.00150232	0.00162117	0.00131468	0.00221467	0.00096798	0.00117989	0.00107878	0.00180947	0.00182065	0.00192822
CDIF630erm_02386	bioB2	biotin synthase	#N/A	#N/A	#N/A	0.00189425	0.00154078	0.00129715	0.00187063	0.00212486	0.00236998	0.00138174	0.000727511	0.000711502	0.00154586	0.00226326	0.00126492
CDIF630erm_02863	mtnN	bifunctional 5*-methylthioadenosine / S-adenosylhomocysteine nucleosidase	#N/A	#N/A	#N/A	0.00285447	0.0013259	0.000163468	0.000768816	0.00144757	0.000857563	0.00168538	0.000474501	0.000728771	0.000883977	0.00249731	0.00403698
CDIF630erm_03042	manC	mannose-1-phosphate guanylyltransferase	#N/A	#N/A	#N/A	0.000803362	0.00445498	0.00225201	0.00238317	0.00426503	0.00161155	0.00260266	0.00276608	0.00263516	0.00993428	0.00164763	0.00202003
CDIF630erm_02914		putative peptidase, M16 family	#N/A	#N/A	#N/A	0.00238414	0.0015839	0.00349639	0.00161347	0.00145893	0.0431225	0.00200703	0.00187827	0.00133564	#N/A	#N/A	#N/A
CDIF630erm_01473		uncharacterized protein DegV family	#N/A	#N/A	#N/A	0.00266638	0.00301181	0.00253237	0.00137247	0.00199058	0.00259608	0.00283695	0.00347612	0.00193122	0.00190493	0.00234187	0.00238513
CDIF630erm_02135	lexA	transcriptional regulator, LexA repressor	#N/A	#N/A	#N/A	0.00562963	0.00401044	0.00201373	0.00187607	0.00398869	0.00412643	0.00209665	0.00799422	0.00124857	0.00223104	0.00369781	0.0118057
CDIF630erm_03760	agaS	putative tagatose-6-phosphate ketose / aldose isomerase AgaS	#N/A	#N/A	#N/A	0.00162011	0.00113956	0.00150822	0.00473253	0.00315845	0.00151257	0.00139717	0.0046734	0.00330439	0.0012513	0.000804143	0.00216926
CDIF630erm_01356	dxs	1-deoxy-D-xylulose-5-phosphate synthase	#N/A	#N/A	#N/A	0.00200622	0.000965273	0.00132964	0.00451413	0.00199801	0.0017383	0.0168819	0.00347605	0.00103951	#N/A	#N/A	#N/A
CDIF630erm_03311		PTS system, arabinose-specific IIA component	#N/A	#N/A	#N/A	0.00683302	0.00339249	0.00342178	0.000328688	0.00126321	0.00176708	0.00140268	0.00147614	0.00241285	#N/A	#N/A	#N/A
CDIF630erm_03315		transcription antiterminator, PTS operon regulator	#N/A	#N/A	#N/A	0.00248597	0.000841977	0.001593	0.000794682	0.00309931	0.00134398	0.000874778	0.00109029	0.000937293	#N/A	#N/A	#N/A
CDIF630erm_01898		putative NAD(P)-binding protein	#N/A	#N/A	#N/A	0.000760886	0.00127014	0.000683451	0.00133754	0.000760484	0.000784052	#N/A	#N/A	#N/A	0.00196247	0.00064555	0.000959071
CDIF630erm_02272	rluB	ribosomal large subunit pseudouridine synthase B	#N/A	#N/A	#N/A	0.0022706	0.00122738	0.00136801	0.000639891	0.00106065	0.0015087	#N/A	#N/A	#N/A	0.00100188	0.00727442	0.00445635
CDIF630erm_00309		putative 2-dehydropantoate 2-reductase	#N/A	#N/A	#N/A	0.0066842	0.00142124	0.0103542	0.00164695	0.00679942	0.00159477	#N/A	#N/A	#N/A	#N/A	#N/A	#N/A
CDIF630erm_03619	fdhF	formate dehydrogenase-H (selenocysteine)	#N/A	#N/A	#N/A	0.0043169	0.00267042	0.00171351	0.00524582	0.00319565	0.00299786	#N/A	#N/A	#N/A	#N/A	#N/A	#N/A
CDIF630erm_01872		putative lipoprotein	#N/A	#N/A	#N/A	0.00216691	0.000908695	0.000477729	0.000680567	0.00120402	0.0022402	#N/A	#N/A	#N/A	0.00118858	0.000553555	0.000916689
CDIF630erm_02299		WEB family protein	#N/A	#N/A	#N/A	0.00171861	0.00257067	0.00244501	0.00195082	0.00145721	0.00104769	#N/A	#N/A	#N/A	0.00294469	0.00281979	0.00344667
CDIF630erm_00307	pyrD	dihydroorotate dehydrogenase (NAD+), catalytic subunit	#N/A	#N/A	#N/A	0.00297457	0.00100929	0.00112784	0.0012536	0.00193793	0.00136821	#N/A	#N/A	#N/A	#N/A	#N/A	#N/A
CDIF630erm_00621		PTS system, ribitol-specific IIB component	#N/A	#N/A	#N/A	0.00260287	0.00188306	0.000958203	0.000841731	0.00110592	0.0013771	#N/A	#N/A	#N/A	#N/A	#N/A	#N/A
CDIF630erm_01596		putative ribonuclease	#N/A	#N/A	#N/A	0.000936421	0.000489502	0.00136512	0.00127509	0.00064732	0.00315126	#N/A	#N/A	#N/A	#N/A	#N/A	#N/A
CDIF630erm_01768	cysE	serine O-acetyltransferase	#N/A	#N/A	#N/A	0.00204449	0.00172895	0.00145898	0.00292593	0.00190885	0.00098749	#N/A	#N/A	#N/A	#N/A	#N/A	#N/A
CDIF630erm_03083		ABC-type transport system, multidrug-family ATP-binding / permease protein	#N/A	#N/A	#N/A	0.00233291	0.000312774	0.000933515	0.000506659	0.00204218	0.00187396	#N/A	#N/A	#N/A	#N/A	#N/A	#N/A
CDIF630erm_03766	ctpB	putative carboxy-terminal protease	#N/A	#N/A	#N/A	0.00257577	0.00128625	0.000896073	0.00159773	0.00140636	0.00139885	#N/A	#N/A	#N/A	#N/A	#N/A	#N/A
CDIF630erm_03114		putative bactofilin	#N/A	#N/A	#N/A	0.00283877	0.00134556	0.00238851	#N/A	#N/A	#N/A	0.00289481	0.0121021	0.00615873	0.00351728	0.0018373	0.00221858
CDIF630erm_03123		putative NAD(P)-binding oxidoreductase	#N/A	#N/A	#N/A	0.00182969	0.00137892	0.0011719	#N/A	#N/A	#N/A	0.00292782	0.00222596	0.00211421	0.00171459	0.00131704	0.00149394
CDIF630erm_03914	pyrF	orotidine 5*-phosphate decarboxylase	#N/A	#N/A	#N/A	0.00231476	0.00149057	0.000908735	#N/A	#N/A	#N/A	0.00224487	0.000936599	0.00114617	0.00162022	0.000222294	0.00153934
CDIF630erm_01317		transcriptional regulator, GntR family	#N/A	#N/A	#N/A	0.0029152	0.0036394	0.000712607	#N/A	#N/A	#N/A	0.00174846	0.00233238	0.000505382	#N/A	#N/A	#N/A
CDIF630erm_02207		putative lipoprotein	#N/A	#N/A	#N/A	0.00408759	0.00410182	0.00323611	#N/A	#N/A	#N/A	0.00798597	0.00432215	0.00288503	#N/A	#N/A	#N/A
CDIF630erm_00124	secE	preprotein translocase SecE subunit	#N/A	#N/A	#N/A	0.00392841	0.00649981	0.00451282	#N/A	#N/A	#N/A	0.00397581	0.00343494	0.00340217	0.003379	0.00383658	0.00149894
CDIF630erm_01453		transcriptional regulator, MarR family	#N/A	#N/A	#N/A	0.000540632	0.00105537	0.00153652	#N/A	#N/A	#N/A	0.0012783	0.000774714	0.00151425	0.000866541	0.00111662	0.00140108
CDIF630erm_03125		putative hydrolase, HAD superfamily, IA subfamily	#N/A	#N/A	#N/A	0.000938317	0.00138797	0.00112968	#N/A	#N/A	#N/A	0.00141144	0.00133389	0.00142026	0.000439567	0.000707287	0.00174001
CDIF630erm_00380	motA	flagellar motor rotation protein MotA	#N/A	#N/A	#N/A	0.00688374	0.00318079	0.0039096	#N/A	#N/A	#N/A	0.0015576	0.0020038	0.0010514	#N/A	#N/A	#N/A
CDIF630erm_00392	flgG1	flagellar basal-body rod protein FlgG	#N/A	#N/A	#N/A	0.00048515	0.000457968	0.000730541	#N/A	#N/A	#N/A	0.00312686	0.00587358	0.00418463	#N/A	#N/A	#N/A
CDIF630erm_01266		transcriptional regulator, RmlC-type	#N/A	#N/A	#N/A	0.000243694	0.000641594	0.00125042	#N/A	#N/A	#N/A	0.000727185	0.000999914	0.000414314	#N/A	#N/A	#N/A
CDIF630erm_03702	whiA	putative sporulation transcription regulator WhiA	#N/A	#N/A	#N/A	0.00106101	0.00159648	0.00140403	#N/A	#N/A	#N/A	0.00128405	0.00430095	0.00142719	#N/A	#N/A	#N/A
CDIF630erm_03810	yabN	bifunctional tetrapyrrole methylase / NTP pyrophosphohydrolase	#N/A	#N/A	#N/A	0.00230494	0.0107352	0.00245434	#N/A	#N/A	#N/A	0.00512046	0.0105421	0.00388881	#N/A	#N/A	#N/A
CDIF630erm_01075		putative phage scaffold protein	#N/A	#N/A	#N/A	0.000226572	0.00611418	0.00169848	#N/A	#N/A	#N/A	#N/A	#N/A	#N/A	#N/A	#N/A	#N/A
CDIF630erm_03394	pfp	diphosphate-fructose-6-phosphate 1-phosphotransferase	#N/A	#N/A	#N/A	0.00164414	0.00274789	0.00170389	#N/A	#N/A	#N/A	#N/A	#N/A	#N/A	#N/A	#N/A	#N/A
CDIF630erm_03736	cbiE	cobalt-precorrin-7 (C5)-methyl transferase	#N/A	#N/A	#N/A	0.0057639	0.0207216	0.00137133	#N/A	#N/A	#N/A	#N/A	#N/A	#N/A	#N/A	#N/A	#N/A
CDIF630erm_01131	hpr	hydroxypyruvate reductase	#N/A	#N/A	#N/A	0.00872371	0.0240377	0.00218727	#N/A	#N/A	#N/A	#N/A	#N/A	#N/A	0.0045183	0.00768804	0.00368018
CDIF630erm_02576		putative membrane protein	#N/A	#N/A	#N/A	0.00118427	0.000565735	0.00222386	#N/A	#N/A	#N/A	#N/A	#N/A	#N/A	0.00175784	0.00179881	0.00346305
CDIF630erm_02991		putative regulator of the sigma(E) factor	#N/A	#N/A	#N/A	0.00513908	0.00170734	0.0027948	#N/A	#N/A	#N/A	#N/A	#N/A	#N/A	0.00316946	0.00159259	0.00181827
CDIF630erm_03751		putative glycoside hydrolase-type carbohydrate-binding protein	#N/A	#N/A	#N/A	0.00369976	0.00337491	0.00190787	#N/A	#N/A	#N/A	#N/A	#N/A	#N/A	0.00182837	0.00135448	0.0189207
CDIF630erm_00099	acoB	acetoin dehydrogenase E1 component (TPP-dependent beta subunit)	#N/A	#N/A	#N/A	0.0012457	0.00436124	0.00233979	#N/A	#N/A	#N/A	#N/A	#N/A	#N/A	#N/A	#N/A	#N/A
CDIF630erm_00916		hydroxymethylglutaryl-CoA lyase	#N/A	#N/A	#N/A	0.000842765	0.000739493	0.000465078	#N/A	#N/A	#N/A	#N/A	#N/A	#N/A	#N/A	#N/A	#N/A
CDIF630erm_01487	spsB3	signal peptidase IB	#N/A	#N/A	#N/A	0.000741129	0.00285794	0.00339682	#N/A	#N/A	#N/A	#N/A	#N/A	#N/A	#N/A	#N/A	#N/A
CDIF630erm_01912	plsC1	putative 1-acyl-sn-glycerol-3-phosphate acyltransferase	#N/A	#N/A	#N/A	0.000579435	0.00139745	0.00150227	#N/A	#N/A	#N/A	#N/A	#N/A	#N/A	#N/A	#N/A	#N/A
CDIF630erm_02377	rtcB	putative RNA-splicing ligase	#N/A	#N/A	#N/A	0.00576644	0.00354016	0.00542539	#N/A	#N/A	#N/A	#N/A	#N/A	#N/A	#N/A	#N/A	#N/A
CDIF630erm_02819		PTS system, mannosylglycerate-specific IIA component	#N/A	#N/A	#N/A	0.00537553	0.00175751	0.00220858	#N/A	#N/A	#N/A	#N/A	#N/A	#N/A	#N/A	#N/A	#N/A
CDIF630erm_03262		putative CRISPR-associated Cas3 family helicase	#N/A	#N/A	#N/A	0.00143097	0.00258037	0.000282545	#N/A	#N/A	#N/A	#N/A	#N/A	#N/A	#N/A	#N/A	#N/A
CDIF630erm_03636		putative conjugative transposon protein	#N/A	#N/A	#N/A	0.000882167	0.000383222	0.0170923	#N/A	#N/A	#N/A	#N/A	#N/A	#N/A	#N/A	#N/A	#N/A
CDIF630erm_03861	rsmI	ribosomal rna small subunit methyltransferase	#N/A	#N/A	#N/A	0.00205638	0.00418834	0.000716709	#N/A	#N/A	#N/A	#N/A	#N/A	#N/A	#N/A	#N/A	#N/A
CDIF630erm_03889	yabG	sporulation-specific protease	#N/A	#N/A	#N/A	0.000589237	0.00285963	0.00575045	#N/A	#N/A	#N/A	#N/A	#N/A	#N/A	#N/A	#N/A	#N/A
CDIF630erm_03987		putative signal transduction phosphoesterase	#N/A	#N/A	#N/A	0.00336746	0.0163794	0.0189431	#N/A	#N/A	#N/A	#N/A	#N/A	#N/A	#N/A	#N/A	#N/A
CDIF630erm_00011	sigB	RNA polymerase sigma-B factor (sigma-37)	#N/A	#N/A	#N/A	#N/A	#N/A	#N/A	0.00102809	0.00904881	0.00442993	0.00253794	0.00144981	0.00412999	0.00224914	0.00214996	0.000836197
CDIF630erm_00085	ctsR	transcriptional regulator CtsR	#N/A	#N/A	#N/A	#N/A	#N/A	#N/A	0.00145956	0.00267652	0.00265115	0.00300227	0.00347556	0.00168742	0.00132813	0.00349467	0.00186292
CDIF630erm_02245		ABC-type transport system, multidrug-family ATP-binding protein	#N/A	#N/A	#N/A	#N/A	#N/A	#N/A	0.0154881	0.00118684	0.00193877	0.00138087	0.00581006	0.00773817	0.004996	0.00811132	0.00777706
CDIF630erm_02393		putative GCN5-related N-acetyltransferase-like protein	#N/A	#N/A	#N/A	#N/A	#N/A	#N/A	0.00104311	0.00168906	0.000755212	0.00129347	0.00159924	0.0012553	0.00213429	0.00196183	0.00276472
CDIF630erm_02404		ABC-type transport system, cystine / aminoacid-family ATP-binding protein	#N/A	#N/A	#N/A	#N/A	#N/A	#N/A	0.000914536	0.00161844	0.00191996	0.00209238	0.00235998	0.00128224	0.00139932	0.00239082	0.001935
CDIF630erm_02947	cobD1	threonine-phosphate decarboxylase	#N/A	#N/A	#N/A	#N/A	#N/A	#N/A	0.00116006	0.00178694	0.00170624	0.00178579	0.0024325	0.000964777	0.000941594	0.00801698	0.00199201
CDIF630erm_01431	iscR	transcriptional regulator of cysteine biosynthesis	#N/A	#N/A	#N/A	#N/A	#N/A	#N/A	0.00138414	0.00326687	0.00230549	0.000254661	0.00131096	0.00126045	#N/A	#N/A	#N/A
CDIF630erm_01823		membrane dipeptidase	#N/A	#N/A	#N/A	#N/A	#N/A	#N/A	0.00176503	0.00205178	0.00182261	0.0035276	0.00362489	0.00386976	#N/A	#N/A	#N/A
CDIF630erm_02080	vncS	two-component sensor histidine kinase	#N/A	#N/A	#N/A	#N/A	#N/A	#N/A	0.00595364	0.00768092	0.00561274	0.00252147	0.000399289	0.00527419	#N/A	#N/A	#N/A
CDIF630erm_02648		putative lipoprotein	#N/A	#N/A	#N/A	#N/A	#N/A	#N/A	0.00282317	0.000903325	0.00142192	0.00314805	0.0037022	0.00198581	#N/A	#N/A	#N/A
CDIF630erm_03009	recJ	single-stranded-DNA-specific exonuclease	#N/A	#N/A	#N/A	#N/A	#N/A	#N/A	0.00124216	0.00196646	0.00132544	0.00167798	0.00144149	0.00133502	#N/A	#N/A	#N/A
CDIF630erm_03408		4fe-4s binding domain protein	#N/A	#N/A	#N/A	#N/A	#N/A	#N/A	0.000658422	0.00211691	0.00171881	0.0030964	0.00443146	0.00171975	#N/A	#N/A	#N/A
CDIF630erm_00851		hypothetical protein	#N/A	#N/A	#N/A	#N/A	#N/A	#N/A	0.00311452	0.0082427	0.00369809	0.00458518	0.00190989	0.00372939	0.00328278	0.00463919	0.00395034
CDIF630erm_01709		putative drug / sodium antiporter, MATE family	#N/A	#N/A	#N/A	#N/A	#N/A	#N/A	0.000847943	0.0043753	0.00150343	0.00207007	0.00373933	0.00274307	0.00244553	0.00287661	0.00191158
CDIF630erm_01966		putative CoA-substrate dehydratase and activase	#N/A	#N/A	#N/A	#N/A	#N/A	#N/A	0.00287971	0.00167352	0.00210319	0.00266321	0.00200866	0.0016919	0.00242012	0.0185278	0.015131
CDIF630erm_02506		putative protein-tyrosine phosphatase	#N/A	#N/A	#N/A	#N/A	#N/A	#N/A	0.00132799	0.00126077	0.00204036	0.00177008	0.00055441	0.000808916	0.000782431	0.00073532	0.00132189
CDIF630erm_02938	isf	iron-sulfur flavoprotein	#N/A	#N/A	#N/A	#N/A	#N/A	#N/A	0.000606804	0.000767747	0.00054916	0.000630353	0.00186674	0.000575086	0.00206719	0.00447394	0.00151673
CDIF630erm_00393	flgG2	flagellar basal body rod protein FlgG	#N/A	#N/A	#N/A	#N/A	#N/A	#N/A	0.00133673	0.000694249	0.000833218	0.00298643	0.00278235	0.00325608	#N/A	#N/A	#N/A
CDIF630erm_01321		lactate dehydrogenase (electron bifurcating), catalytic subunit	#N/A	#N/A	#N/A	#N/A	#N/A	#N/A	0.00260018	0.00173658	0.00154576	0.000503497	0.00371064	0.00316297	#N/A	#N/A	#N/A
CDIF630erm_03376		uncharacterized protein, class I glutamine amidotransferase-like	#N/A	#N/A	#N/A	#N/A	#N/A	#N/A	0.00188548	0.00276031	0.00265534	0.00329246	0.00367544	0.00357897	#N/A	#N/A	#N/A
CDIF630erm_00226		putative exported protein	#N/A	#N/A	#N/A	#N/A	#N/A	#N/A	0.00177663	0.00264823	0.000905848	#N/A	#N/A	#N/A	0.00104836	0.00159885	0.00126177
CDIF630erm_00434		putative hydrolase, HAD superfamily, subfamily IB	#N/A	#N/A	#N/A	#N/A	#N/A	#N/A	0.00130445	0.00130311	0.00089786	#N/A	#N/A	#N/A	0.00114945	0.00156355	0.00108484
CDIF630erm_00969		putative NifU-like protein	#N/A	#N/A	#N/A	#N/A	#N/A	#N/A	0.00840006	0.00453787	0.004777	#N/A	#N/A	#N/A	0.0100738	0.00503995	0.000959103
CDIF630erm_00988		dna binding domain, excisionase family	#N/A	#N/A	#N/A	#N/A	#N/A	#N/A	0.00042035	0.000899367	0.00120216	#N/A	#N/A	#N/A	0.00170109	0.00170608	0.00243384
CDIF630erm_01150		two-component sensor histidine kinase	#N/A	#N/A	#N/A	#N/A	#N/A	#N/A	0.0210492	0.0129511	0.0103552	#N/A	#N/A	#N/A	0.00261168	0.0133576	0.00843065
CDIF630erm_01610	pabB	aminodeoxychorismate synthase, component 1	#N/A	#N/A	#N/A	#N/A	#N/A	#N/A	0.00114467	0.0044744	0.00319289	#N/A	#N/A	#N/A	0.000843446	0.00179649	0.00197547
CDIF630erm_04102		putative conjugative transposon protein, YdcP-like	#N/A	#N/A	#N/A	#N/A	#N/A	#N/A	0.00174126	0.0006444	0.000612444	#N/A	#N/A	#N/A	0.00203748	0.000638194	0.00210867
CDIF630erm_01213		putative histidinol-phosphatase	#N/A	#N/A	#N/A	#N/A	#N/A	#N/A	0.00140291	0.00140607	0.000810166	#N/A	#N/A	#N/A	#N/A	#N/A	#N/A
CDIF630erm_01400	rnc	ribonuclease III	#N/A	#N/A	#N/A	#N/A	#N/A	#N/A	0.00671803	0.00128222	0.00264057	#N/A	#N/A	#N/A	#N/A	#N/A	#N/A
CDIF630erm_01470	truB	tRNA pseudouridine synthase B	#N/A	#N/A	#N/A	#N/A	#N/A	#N/A	0.00406218	0.000726354	0.00056618	#N/A	#N/A	#N/A	#N/A	#N/A	#N/A
CDIF630erm_01735	ilvB	acetolactate synthase large subunit	#N/A	#N/A	#N/A	#N/A	#N/A	#N/A	0.0193537	0.0112626	0.0152617	#N/A	#N/A	#N/A	#N/A	#N/A	#N/A
CDIF630erm_02769	cwp29	cell surface protein cwp29	#N/A	#N/A	#N/A	#N/A	#N/A	#N/A	0.00170646	0.00209818	0.00279713	#N/A	#N/A	#N/A	#N/A	#N/A	#N/A
CDIF630erm_00646	cheY	chemotaxis protein CheY	#N/A	#N/A	#N/A	#N/A	#N/A	#N/A	0.00144822	0.000197389	0.00604708	#N/A	#N/A	#N/A	0.00238317	0.00372838	0.00431578
CDIF630erm_01450	scpB	segregation and condensation protein B	#N/A	#N/A	#N/A	#N/A	#N/A	#N/A	0.00199522	0.000278798	0.000130834	#N/A	#N/A	#N/A	0.00095391	0.00163433	0.000880697
CDIF630erm_01469		putative rna-binding protein	#N/A	#N/A	#N/A	#N/A	#N/A	#N/A	0.00148957	0.00254131	0.00114706	#N/A	#N/A	#N/A	0.00435458	0.00274365	0.0019937
CDIF630erm_01696		ABC-type transport system, ATP-binding protein	#N/A	#N/A	#N/A	#N/A	#N/A	#N/A	0.000941948	0.0014599	0.000417721	#N/A	#N/A	#N/A	0.00116196	0.00123646	0.00124051
CDIF630erm_02806		PTS system, fructose / mannitol-family IIB component	#N/A	#N/A	#N/A	#N/A	#N/A	#N/A	0.000564711	0.00188017	0.00130752	#N/A	#N/A	#N/A	0.00635622	0.00226924	0.00306098
CDIF630erm_02829		thiamin monophosphate phosphatase	#N/A	#N/A	#N/A	#N/A	#N/A	#N/A	0.0015954	0.000302185	0.0019092	#N/A	#N/A	#N/A	0.00378842	0.00248078	0.00379867
CDIF630erm_03130		membrane dipeptidase	#N/A	#N/A	#N/A	#N/A	#N/A	#N/A	0.00663092	0.00373573	0.00430446	#N/A	#N/A	#N/A	0.00502771	0.00111994	0.00114764
CDIF630erm_03314		PTS system, arabinose-specific IIBC component	#N/A	#N/A	#N/A	#N/A	#N/A	#N/A	0.00134441	0.00628603	0.00181163	#N/A	#N/A	#N/A	0.00312606	0.00145525	0.00457018
CDIF630erm_03357	gatY1	D-tagatose-1,6-bisphosphate aldolase	#N/A	#N/A	#N/A	#N/A	#N/A	#N/A	0.00769457	0.00177606	0.00585929	#N/A	#N/A	#N/A	0.0206308	0.0209816	0.0182071
CDIF630erm_03359	tagK	tagatose-1-phosphate kinase	#N/A	#N/A	#N/A	#N/A	#N/A	#N/A	0.00146028	0.000921509	0.00132713	#N/A	#N/A	#N/A	0.00557768	0.00415549	0.0050733
CDIF630erm_03373	treR	transcriptional regulator, GntR family	#N/A	#N/A	#N/A	#N/A	#N/A	#N/A	0.000925583	0.000508113	0.0139805	#N/A	#N/A	#N/A	0.000997974	0.000748607	0.000538116
CDIF630erm_03922		two-component response regulator, CheY family	#N/A	#N/A	#N/A	#N/A	#N/A	#N/A	0.000858475	0.00584628	0.000777719	#N/A	#N/A	#N/A	0.0239493	0.00160315	0.00120151
CDIF630erm_00030	dnaX	DNA polymerase III subunit gamma / tau	#N/A	#N/A	#N/A	#N/A	#N/A	#N/A	0.0022864	0.000724027	0.00305935	#N/A	#N/A	#N/A	#N/A	#N/A	#N/A
CDIF630erm_00102		transcription antiterminator, PTS operon regulator	#N/A	#N/A	#N/A	#N/A	#N/A	#N/A	0.00206933	0.00171686	0.00225152	#N/A	#N/A	#N/A	#N/A	#N/A	#N/A
CDIF630erm_00172	ecfT	energy-coupling factor transporter transmembrane protein EcfT	#N/A	#N/A	#N/A	#N/A	#N/A	#N/A	0.00403766	0.00186888	0.00290361	#N/A	#N/A	#N/A	#N/A	#N/A	#N/A
CDIF630erm_00267		uncharacterized protein	#N/A	#N/A	#N/A	#N/A	#N/A	#N/A	0.000983817	0.00266349	0.00244453	#N/A	#N/A	#N/A	#N/A	#N/A	#N/A
CDIF630erm_00293		uncharacterized protein, FmdE-family	#N/A	#N/A	#N/A	#N/A	#N/A	#N/A	0.000999904	0.000349446	0.00103861	#N/A	#N/A	#N/A	#N/A	#N/A	#N/A
CDIF630erm_00549		DNA topoisomerase protein, type IA	#N/A	#N/A	#N/A	#N/A	#N/A	#N/A	0.000843545	0.00188756	0.00627922	#N/A	#N/A	#N/A	#N/A	#N/A	#N/A
CDIF630erm_00561		ABC-type transport system, multidrug-family permease	#N/A	#N/A	#N/A	#N/A	#N/A	#N/A	0.000157642	0.0019866	0.00391913	#N/A	#N/A	#N/A	#N/A	#N/A	#N/A
CDIF630erm_00568	cwp27	putative cell wall binding protein cwp27	#N/A	#N/A	#N/A	#N/A	#N/A	#N/A	0.000909938	0.00122794	0.00194835	#N/A	#N/A	#N/A	#N/A	#N/A	#N/A
CDIF630erm_00619	xpdH2	ribitol-5-phosphate dehydrogenase	#N/A	#N/A	#N/A	#N/A	#N/A	#N/A	0.00621454	0.00376038	0.00183589	#N/A	#N/A	#N/A	#N/A	#N/A	#N/A
CDIF630erm_00670	thrS/udk	fusion protein threonine-tRNA ligase / uridine kinase	#N/A	#N/A	#N/A	#N/A	#N/A	#N/A	0.0031884	0.00917013	0.00771557	#N/A	#N/A	#N/A	#N/A	#N/A	#N/A
CDIF630erm_00854		putative exported protein	#N/A	#N/A	#N/A	#N/A	#N/A	#N/A	0.00177459	0.000327493	0.000316166	#N/A	#N/A	#N/A	#N/A	#N/A	#N/A
CDIF630erm_00855		putative exported protein	#N/A	#N/A	#N/A	#N/A	#N/A	#N/A	0.00555382	0.000347034	0.00267831	#N/A	#N/A	#N/A	#N/A	#N/A	#N/A
CDIF630erm_01027		putative phage DNA-binding protein	#N/A	#N/A	#N/A	#N/A	#N/A	#N/A	0.00204502	0.00210744	0.00029561	#N/A	#N/A	#N/A	#N/A	#N/A	#N/A
CDIF630erm_01073		putative phage minor head protein	#N/A	#N/A	#N/A	#N/A	#N/A	#N/A	0.000291	0.00207798	0.000846136	#N/A	#N/A	#N/A	#N/A	#N/A	#N/A
CDIF630erm_01182	sbcD	nuclease SbcCD subunit D	#N/A	#N/A	#N/A	#N/A	#N/A	#N/A	0.00115078	0.00415901	0.000938779	#N/A	#N/A	#N/A	#N/A	#N/A	#N/A
CDIF630erm_01314	hom1	homoserine dehydrogenase	#N/A	#N/A	#N/A	#N/A	#N/A	#N/A	0.00238339	0.00209313	0.00159918	#N/A	#N/A	#N/A	#N/A	#N/A	#N/A
CDIF630erm_01380		putative site-specific recombinase	#N/A	#N/A	#N/A	#N/A	#N/A	#N/A	0.00116101	0.00438804	0.00244733	#N/A	#N/A	#N/A	#N/A	#N/A	#N/A
CDIF630erm_01423		two-component sensor histidine kinase	#N/A	#N/A	#N/A	#N/A	#N/A	#N/A	0.00196384	0.00083004	0.00116549	#N/A	#N/A	#N/A	#N/A	#N/A	#N/A
CDIF630erm_01497	exoA	exodeoxyribonuclease	#N/A	#N/A	#N/A	#N/A	#N/A	#N/A	0.000681975	0.00488746	0.00163238	#N/A	#N/A	#N/A	#N/A	#N/A	#N/A
CDIF630erm_01564		putative oligopeptide transporter	#N/A	#N/A	#N/A	#N/A	#N/A	#N/A	0.00263936	0.00486547	0.00332189	#N/A	#N/A	#N/A	#N/A	#N/A	#N/A
CDIF630erm_01601		homeodomain-like protein	#N/A	#N/A	#N/A	#N/A	#N/A	#N/A	0.00140325	0.001959	0.00197706	#N/A	#N/A	#N/A	#N/A	#N/A	#N/A
CDIF630erm_01654	metN	ABC-type transport system, methionine-specific ATP-binding protein	#N/A	#N/A	#N/A	#N/A	#N/A	#N/A	0.00104087	0.00171117	0.00116181	#N/A	#N/A	#N/A	#N/A	#N/A	#N/A
CDIF630erm_01887	recQ	ATP-dependent DNA helicase	#N/A	#N/A	#N/A	#N/A	#N/A	#N/A	0.00152563	0.00251349	0.00127114	#N/A	#N/A	#N/A	#N/A	#N/A	#N/A
CDIF630erm_01901	moaA	cyclic pyranopterin monophosphate synthase	#N/A	#N/A	#N/A	#N/A	#N/A	#N/A	0.00163286	0.000326473	0.00073079	#N/A	#N/A	#N/A	#N/A	#N/A	#N/A
CDIF630erm_02562	xpdH1	xylitol-phosphate dehydrogenase	#N/A	#N/A	#N/A	#N/A	#N/A	#N/A	0.000320972	0.0013667	0.00338604	#N/A	#N/A	#N/A	#N/A	#N/A	#N/A
CDIF630erm_02867		uncharacterized protein, DegV family	#N/A	#N/A	#N/A	#N/A	#N/A	#N/A	0.0150222	0.0124534	0.017612	#N/A	#N/A	#N/A	#N/A	#N/A	#N/A
CDIF630erm_03481		putative NADPH-dependent FMN reductase	#N/A	#N/A	#N/A	#N/A	#N/A	#N/A	0.000725494	0.000854879	0.000704208	#N/A	#N/A	#N/A	#N/A	#N/A	#N/A
CDIF630erm_03506		putative S-adenosyl-L-methionine-dependent methyltransferase	#N/A	#N/A	#N/A	#N/A	#N/A	#N/A	0.00122964	0.000978568	0.00342404	#N/A	#N/A	#N/A	#N/A	#N/A	#N/A
CDIF630erm_03808		putative RNA-binding S4 domain-containing protein	#N/A	#N/A	#N/A	#N/A	#N/A	#N/A	0.000933739	0.00253142	0.00232021	#N/A	#N/A	#N/A	#N/A	#N/A	#N/A
CDIF630erm_03916		uncharacterized protein, nitroreductase-like	#N/A	#N/A	#N/A	#N/A	#N/A	#N/A	0.000900971	0.00102678	0.0014143	#N/A	#N/A	#N/A	#N/A	#N/A	#N/A
CDIF630erm_03964		2-dehydro-3-deoxygluconate kinase	#N/A	#N/A	#N/A	#N/A	#N/A	#N/A	0.000805474	0.0011763	6.56226e-05	#N/A	#N/A	#N/A	#N/A	#N/A	#N/A
CDIF630erm_00003		putative RNA-binding mediating protein	#N/A	#N/A	#N/A	#N/A	#N/A	#N/A	#N/A	#N/A	#N/A	0.00195147	0.00238054	0.00187946	0.00403816	0.00369182	0.00429878
CDIF630erm_01146	nagA1	N-acetylglucosamine-6-phosphate deacetylase	#N/A	#N/A	#N/A	#N/A	#N/A	#N/A	#N/A	#N/A	#N/A	0.00398758	0.00221283	0.00300001	0.00420014	0.00282932	0.00716021
CDIF630erm_01439		putative holliday junction resolvase	#N/A	#N/A	#N/A	#N/A	#N/A	#N/A	#N/A	#N/A	#N/A	0.00294029	0.00220624	0.00229074	0.00208504	0.00165037	0.002329
CDIF630erm_03011		uncharacterized protein, LpxA-like	#N/A	#N/A	#N/A	#N/A	#N/A	#N/A	#N/A	#N/A	#N/A	0.00519358	0.00322152	0.00300194	0.00161041	0.00168781	0.00221576
CDIF630erm_00086	mcsA	protein-arginine kinase activator protein	#N/A	#N/A	#N/A	#N/A	#N/A	#N/A	#N/A	#N/A	#N/A	0.00533597	0.00689951	0.00603697	#N/A	#N/A	#N/A
CDIF630erm_00438		cadmium, zinc and cobalt-transporting ATPase	#N/A	#N/A	#N/A	#N/A	#N/A	#N/A	#N/A	#N/A	#N/A	0.00150969	0.00224956	0.00173649	#N/A	#N/A	#N/A
CDIF630erm_00989	modA	ABC-type transport system, molybdenum-specific extracellular solute-binding protein	#N/A	#N/A	#N/A	#N/A	#N/A	#N/A	#N/A	#N/A	#N/A	0.00255578	0.00398402	0.00147726	#N/A	#N/A	#N/A
CDIF630erm_02242		hypothetical protein	#N/A	#N/A	#N/A	#N/A	#N/A	#N/A	#N/A	#N/A	#N/A	0.00766441	0.0106388	0.0116148	#N/A	#N/A	#N/A
CDIF630erm_02243	repL	plasmid replication protein	#N/A	#N/A	#N/A	#N/A	#N/A	#N/A	#N/A	#N/A	#N/A	0.00565071	0.00628652	0.00342379	#N/A	#N/A	#N/A
CDIF630erm_02355		putative acetyltransferase	#N/A	#N/A	#N/A	#N/A	#N/A	#N/A	#N/A	#N/A	#N/A	0.000249742	0.000685306	0.000717779	#N/A	#N/A	#N/A
CDIF630erm_02743	selD	selenide, water dikinase	#N/A	#N/A	#N/A	#N/A	#N/A	#N/A	#N/A	#N/A	#N/A	0.00125178	0.00269805	0.00138994	#N/A	#N/A	#N/A
CDIF630erm_03115		putative bactofilin	#N/A	#N/A	#N/A	#N/A	#N/A	#N/A	#N/A	#N/A	#N/A	0.00359555	0.00337791	0.00338212	#N/A	#N/A	#N/A
CDIF630erm_03556		iron hydrogenase	#N/A	#N/A	#N/A	#N/A	#N/A	#N/A	#N/A	#N/A	#N/A	0.00167328	0.00367959	0.00111975	#N/A	#N/A	#N/A
CDIF630erm_00425	rbsB1	ABC-type transport system, ribose-specific extracellular solute-binding protein	#N/A	#N/A	#N/A	#N/A	#N/A	#N/A	#N/A	#N/A	#N/A	0.00194924	0.00252362	0.00175623	0.00281855	0.00168366	0.00257915
CDIF630erm_01125	leuA	2-isopropylmalate synthase	#N/A	#N/A	#N/A	#N/A	#N/A	#N/A	#N/A	#N/A	#N/A	0.00154838	0.00258824	0.00167981	0.00474785	0.0132524	0.00226885
CDIF630erm_01841		uncharacterized protein	#N/A	#N/A	#N/A	#N/A	#N/A	#N/A	#N/A	#N/A	#N/A	0.00135706	0.00118321	0.00100263	0.00179347	0.0017919	0.00128179
CDIF630erm_02308	dpaL1	diaminopropionate ammonia-lyase	#N/A	#N/A	#N/A	#N/A	#N/A	#N/A	#N/A	#N/A	#N/A	0.000699474	0.000519468	0.000176187	0.000294106	0.000515849	0.0015299
CDIF630erm_02600		uncharacterized protein, MerB-like	#N/A	#N/A	#N/A	#N/A	#N/A	#N/A	#N/A	#N/A	#N/A	0.00150128	0.00107576	0.00119968	0.00221109	0.0048782	0.00147218
CDIF630erm_02620	iorB	indolepyruvate oxidoreductase, sununit beta	#N/A	#N/A	#N/A	#N/A	#N/A	#N/A	#N/A	#N/A	#N/A	0.00123879	0.000241787	0.000682764	0.00113267	0.000751212	0.00267582
CDIF630erm_03027	ybiV	putative sugar phosphatase	#N/A	#N/A	#N/A	#N/A	#N/A	#N/A	#N/A	#N/A	#N/A	0.00737219	0.00439291	0.00949544	0.000778241	0.00143886	0.0431385
CDIF630erm_03954		transcription antiterminator, PTS operon regulator	#N/A	#N/A	#N/A	#N/A	#N/A	#N/A	#N/A	#N/A	#N/A	0.00217198	0.00214186	0.000486243	0.00147454	0.00329216	0.0109636
CDIF630erm_00317	larC	Ni2+ carrier LarC	#N/A	#N/A	#N/A	#N/A	#N/A	#N/A	#N/A	#N/A	#N/A	0.0128029	0.00293744	0.00581349	#N/A	#N/A	#N/A
CDIF630erm_00348		putative lytic transglycosylase	#N/A	#N/A	#N/A	#N/A	#N/A	#N/A	#N/A	#N/A	#N/A	0.00706934	0.00772478	0.00744746	#N/A	#N/A	#N/A
CDIF630erm_00368	flgB	flagellar basal-body rod protein FlgB	#N/A	#N/A	#N/A	#N/A	#N/A	#N/A	#N/A	#N/A	#N/A	0.00402271	0.00254124	0.00556596	#N/A	#N/A	#N/A
CDIF630erm_00369	flgC	flagellar basal-body rod protein FlgC	#N/A	#N/A	#N/A	#N/A	#N/A	#N/A	#N/A	#N/A	#N/A	0.00317089	0.00359572	0.00177275	#N/A	#N/A	#N/A
CDIF630erm_00370	fliE	flagellar hook-basal body complex protein FliE	#N/A	#N/A	#N/A	#N/A	#N/A	#N/A	#N/A	#N/A	#N/A	0.00266389	0.00268577	0.00208166	#N/A	#N/A	#N/A
CDIF630erm_00530		transcriptional regulator, sigma-54-dependent	#N/A	#N/A	#N/A	#N/A	#N/A	#N/A	#N/A	#N/A	#N/A	0.000635997	0.000743464	0.00218587	#N/A	#N/A	#N/A
CDIF630erm_00620		PTS system, ribitol-specific IIA component	#N/A	#N/A	#N/A	#N/A	#N/A	#N/A	#N/A	#N/A	#N/A	0.000377559	0.00257791	0.00122515	#N/A	#N/A	#N/A
CDIF630erm_00962		putative glycosyl transferase, group 1	#N/A	#N/A	#N/A	#N/A	#N/A	#N/A	#N/A	#N/A	#N/A	0.0258996	0.00469664	0.019862	#N/A	#N/A	#N/A
CDIF630erm_01063		putative phage anti-repressor	#N/A	#N/A	#N/A	#N/A	#N/A	#N/A	#N/A	#N/A	#N/A	0.000776733	0.00375686	0.00452969	#N/A	#N/A	#N/A
CDIF630erm_01126	leuC	3-isopropylmalate dehydratase large subunit	#N/A	#N/A	#N/A	#N/A	#N/A	#N/A	#N/A	#N/A	#N/A	0.00530932	0.00207172	0.00251512	#N/A	#N/A	#N/A
CDIF630erm_01140	fumB	fumarate hydratase class i, subunit B	#N/A	#N/A	#N/A	#N/A	#N/A	#N/A	#N/A	#N/A	#N/A	0.000617026	0.000215821	0.000352601	#N/A	#N/A	#N/A
CDIF630erm_01425		putative magnesium chelatase	#N/A	#N/A	#N/A	#N/A	#N/A	#N/A	#N/A	#N/A	#N/A	0.00672521	0.00268055	0.00746349	#N/A	#N/A	#N/A
CDIF630erm_01509		putative pyridoxine kinase	#N/A	#N/A	#N/A	#N/A	#N/A	#N/A	#N/A	#N/A	#N/A	0.00122901	0.00108831	0.00199031	#N/A	#N/A	#N/A
CDIF630erm_01551		putative hydrolase, CocE / NonD family	#N/A	#N/A	#N/A	#N/A	#N/A	#N/A	#N/A	#N/A	#N/A	0.00141778	0.00137641	0.0011238	#N/A	#N/A	#N/A
CDIF630erm_01883	ribBA	bifunctional 3,4-dihydroxy-2-butanone 4-phosphate synthase / GTP cyclohydrolase-2	#N/A	#N/A	#N/A	#N/A	#N/A	#N/A	#N/A	#N/A	#N/A	0.00273967	0.0025718	0.000244414	#N/A	#N/A	#N/A
CDIF630erm_02029		transcriptional regulator, MarR family	#N/A	#N/A	#N/A	#N/A	#N/A	#N/A	#N/A	#N/A	#N/A	0.000309706	0.000866248	0.00159879	#N/A	#N/A	#N/A
CDIF630erm_02058		putative cell wall hydrolase	#N/A	#N/A	#N/A	#N/A	#N/A	#N/A	#N/A	#N/A	#N/A	0.00423525	0.00267299	0.00057516	#N/A	#N/A	#N/A
CDIF630erm_02398	msrAB	peptide methionine sulfoxide reductase MsrA / MsrB	#N/A	#N/A	#N/A	#N/A	#N/A	#N/A	#N/A	#N/A	#N/A	0.000767134	0.00098156	0.00132479	#N/A	#N/A	#N/A
CDIF630erm_02807		PTS system, fructose / mannitol-family IIAB component	#N/A	#N/A	#N/A	#N/A	#N/A	#N/A	#N/A	#N/A	#N/A	0.00128409	0.00462535	0.0655425	#N/A	#N/A	#N/A
CDIF630erm_02961	adeP	adenine permease AdeP	#N/A	#N/A	#N/A	#N/A	#N/A	#N/A	#N/A	#N/A	#N/A	0.00151834	0.00196969	0.00152364	#N/A	#N/A	#N/A
CDIF630erm_03028		transcriptional regulator, LytR family	#N/A	#N/A	#N/A	#N/A	#N/A	#N/A	#N/A	#N/A	#N/A	0.00114294	0.000636479	0.00111076	#N/A	#N/A	#N/A
CDIF630erm_03031		putative cell-wall hydrolase	#N/A	#N/A	#N/A	#N/A	#N/A	#N/A	#N/A	#N/A	#N/A	0.00361254	0.00346785	0.00317327	#N/A	#N/A	#N/A
CDIF630erm_03087		putative glutamate carboxypeptidase, M20 family	#N/A	#N/A	#N/A	#N/A	#N/A	#N/A	#N/A	#N/A	#N/A	0.00119465	0.00282436	0.00263824	#N/A	#N/A	#N/A
CDIF630erm_03094		uncharacterized protein	#N/A	#N/A	#N/A	#N/A	#N/A	#N/A	#N/A	#N/A	#N/A	0.00804741	0.00846687	0.00638276	#N/A	#N/A	#N/A
CDIF630erm_03241	atpC1	V-type ATP synthase subunit C	#N/A	#N/A	#N/A	#N/A	#N/A	#N/A	#N/A	#N/A	#N/A	0.00119578	0.000642395	0.00420357	#N/A	#N/A	#N/A
CDIF630erm_03312	kpsF	arabinose 5-phosphate isomerase	#N/A	#N/A	#N/A	#N/A	#N/A	#N/A	#N/A	#N/A	#N/A	0.00163622	0.00119552	0.000467159	#N/A	#N/A	#N/A
CDIF630erm_03351	xynB	PTS system, xyloside-specific IIB component	#N/A	#N/A	#N/A	#N/A	#N/A	#N/A	#N/A	#N/A	#N/A	0.000826612	0.00110359	0.001443	#N/A	#N/A	#N/A
CDIF630erm_03432		putative DNA-methyltransferase	#N/A	#N/A	#N/A	#N/A	#N/A	#N/A	#N/A	#N/A	#N/A	0.000639303	0.00124712	0.0859328	#N/A	#N/A	#N/A
CDIF630erm_00173	truA1	transfer RNA pseudouridine synthase A	#N/A	#N/A	#N/A	#N/A	#N/A	#N/A	#N/A	#N/A	#N/A	#N/A	#N/A	#N/A	0.00142285	0.00154403	0.000893336
CDIF630erm_00321		putative 5*-nucleotidase	#N/A	#N/A	#N/A	#N/A	#N/A	#N/A	#N/A	#N/A	#N/A	#N/A	#N/A	#N/A	0.000612689	0.00267991	0.00224049
CDIF630erm_00693	gapN	glyceraldehyde-3-phosphate dehydrogenase (NADP+)	#N/A	#N/A	#N/A	#N/A	#N/A	#N/A	#N/A	#N/A	#N/A	#N/A	#N/A	#N/A	0.0129958	0.00502478	0.0326001
CDIF630erm_00870		ABC-type transport system, aminoacid-family ATP-binding protein	#N/A	#N/A	#N/A	#N/A	#N/A	#N/A	#N/A	#N/A	#N/A	#N/A	#N/A	#N/A	0.000661021	0.0017253	0.000273903
CDIF630erm_00902		putative N-acetylmuramoyl-L-alanine amidase	#N/A	#N/A	#N/A	#N/A	#N/A	#N/A	#N/A	#N/A	#N/A	#N/A	#N/A	#N/A	0.00201696	0.00102558	0.0021359
CDIF630erm_01376		putative O-methyltransferase	#N/A	#N/A	#N/A	#N/A	#N/A	#N/A	#N/A	#N/A	#N/A	#N/A	#N/A	#N/A	0.00252438	0.000488762	0.00127838
CDIF630erm_01719	hisB	imidazoleglycerol-phosphate dehydratase	#N/A	#N/A	#N/A	#N/A	#N/A	#N/A	#N/A	#N/A	#N/A	#N/A	#N/A	#N/A	0.00174316	0.00225285	0.0020109
CDIF630erm_02068		putative DNA recombination protein	#N/A	#N/A	#N/A	#N/A	#N/A	#N/A	#N/A	#N/A	#N/A	#N/A	#N/A	#N/A	0.00193269	0.00136402	0.00103155
CDIF630erm_02582	cat1	succinyl-CoA:coenzyme A transferase	#N/A	#N/A	#N/A	#N/A	#N/A	#N/A	#N/A	#N/A	#N/A	#N/A	#N/A	#N/A	0.00337676	0.00969977	0.00221195
CDIF630erm_02817		transcriptional regulator, MerR family	#N/A	#N/A	#N/A	#N/A	#N/A	#N/A	#N/A	#N/A	#N/A	#N/A	#N/A	#N/A	0.00269452	0.0016725	0.00378057
CDIF630erm_02833	rlmN	dual-specificity RNA methyltransferase RlmN	#N/A	#N/A	#N/A	#N/A	#N/A	#N/A	#N/A	#N/A	#N/A	#N/A	#N/A	#N/A	0.00315455	0.00223849	0.00247978
CDIF630erm_03080		hypothetical protein	#N/A	#N/A	#N/A	#N/A	#N/A	#N/A	#N/A	#N/A	#N/A	#N/A	#N/A	#N/A	0.0130056	0.0116452	0.000802054
CDIF630erm_03100		putative calcium-transporting ATPase	#N/A	#N/A	#N/A	#N/A	#N/A	#N/A	#N/A	#N/A	#N/A	#N/A	#N/A	#N/A	0.00246893	0.00249353	0.00450913
CDIF630erm_03886	ispE	4-diphosphocytidyl-2-C-methyl-D-erythritol kinase	#N/A	#N/A	#N/A	#N/A	#N/A	#N/A	#N/A	#N/A	#N/A	#N/A	#N/A	#N/A	0.0034916	0.00213089	0.00211884
CDIF630erm_00095		xylan 1,4-beta-xylosidase	#N/A	#N/A	#N/A	#N/A	#N/A	#N/A	#N/A	#N/A	#N/A	#N/A	#N/A	#N/A	0.000566491	0.00226677	0.000533337
CDIF630erm_00374	fliI	ATP synthase subunit beta FliI	#N/A	#N/A	#N/A	#N/A	#N/A	#N/A	#N/A	#N/A	#N/A	#N/A	#N/A	#N/A	0.00233716	0.00197035	0.00472774
CDIF630erm_00389	flhG	flagellar number regulator FlhG	#N/A	#N/A	#N/A	#N/A	#N/A	#N/A	#N/A	#N/A	#N/A	#N/A	#N/A	#N/A	0.00179087	0.00167099	0.00114712
CDIF630erm_00429		class I glutamine amidotransferase-like protein	#N/A	#N/A	#N/A	#N/A	#N/A	#N/A	#N/A	#N/A	#N/A	#N/A	#N/A	#N/A	0.00277192	0.00282882	0.00289646
CDIF630erm_00580		putative hydrolase, NUDIX family	#N/A	#N/A	#N/A	#N/A	#N/A	#N/A	#N/A	#N/A	#N/A	#N/A	#N/A	#N/A	0.00106492	0.000827498	0.000574111
CDIF630erm_00737		putative replicative helicase DnaB-like	#N/A	#N/A	#N/A	#N/A	#N/A	#N/A	#N/A	#N/A	#N/A	#N/A	#N/A	#N/A	0.00179635	0.000796725	0.000447871
CDIF630erm_00779		hypothetical protein	#N/A	#N/A	#N/A	#N/A	#N/A	#N/A	#N/A	#N/A	#N/A	#N/A	#N/A	#N/A	0.00138798	0.00117963	0.0013716
CDIF630erm_00805		putative metallo-hydrolase / oxidoreductase	#N/A	#N/A	#N/A	#N/A	#N/A	#N/A	#N/A	#N/A	#N/A	#N/A	#N/A	#N/A	0.00155309	0.00117726	0.000681109
CDIF630erm_01142		putative acyl-CoA N-acyltransferase	#N/A	#N/A	#N/A	#N/A	#N/A	#N/A	#N/A	#N/A	#N/A	#N/A	#N/A	#N/A	0.000859719	0.00189665	0.00107902
CDIF630erm_01463		uncharacterized protein	#N/A	#N/A	#N/A	#N/A	#N/A	#N/A	#N/A	#N/A	#N/A	#N/A	#N/A	#N/A	0.00392907	0.00381705	0.00502988
CDIF630erm_01716	hisZ	ATP phosphoribosyltransferase, regulatory subunit	#N/A	#N/A	#N/A	#N/A	#N/A	#N/A	#N/A	#N/A	#N/A	#N/A	#N/A	#N/A	0.0017138	0.000969757	0.00178071
CDIF630erm_01730		putative xanthine dehydrogenase accessory factor	#N/A	#N/A	#N/A	#N/A	#N/A	#N/A	#N/A	#N/A	#N/A	#N/A	#N/A	#N/A	0.001538	0.00101119	0.000360237
CDIF630erm_01820		putative hydrolase	#N/A	#N/A	#N/A	#N/A	#N/A	#N/A	#N/A	#N/A	#N/A	#N/A	#N/A	#N/A	0.00179137	0.0054223	0.00176798
CDIF630erm_01849	cysM	cysteine synthase	#N/A	#N/A	#N/A	#N/A	#N/A	#N/A	#N/A	#N/A	#N/A	#N/A	#N/A	#N/A	0.000268176	0.00114095	0.000869343
CDIF630erm_01975		putative arsenate reductase	#N/A	#N/A	#N/A	#N/A	#N/A	#N/A	#N/A	#N/A	#N/A	#N/A	#N/A	#N/A	0.00126444	0.00251366	0.000961349
CDIF630erm_01985		NlpC / p60-like transpeptidase	#N/A	#N/A	#N/A	#N/A	#N/A	#N/A	#N/A	#N/A	#N/A	#N/A	#N/A	#N/A	0.000559192	0.00144838	0.00351019
CDIF630erm_02023	bcp	putative peroxiredoxin	#N/A	#N/A	#N/A	#N/A	#N/A	#N/A	#N/A	#N/A	#N/A	#N/A	#N/A	#N/A	0.000955916	0.00092476	0.00219767
CDIF630erm_02180	miaA	tRNA dimethylallyltransferase	#N/A	#N/A	#N/A	#N/A	#N/A	#N/A	#N/A	#N/A	#N/A	#N/A	#N/A	#N/A	0.00171982	0.00100811	0.00201919
CDIF630erm_02473	nanA	acetylneuraminate lyase	#N/A	#N/A	#N/A	#N/A	#N/A	#N/A	#N/A	#N/A	#N/A	#N/A	#N/A	#N/A	0.00281987	0.000867028	0.00170919
CDIF630erm_02564		PTS system, arabitol / xylitol-specific IIB component	#N/A	#N/A	#N/A	#N/A	#N/A	#N/A	#N/A	#N/A	#N/A	#N/A	#N/A	#N/A	0.000765429	0.000721417	0.00209352
CDIF630erm_02596	trxB3	thioredoxin reductase	#N/A	#N/A	#N/A	#N/A	#N/A	#N/A	#N/A	#N/A	#N/A	#N/A	#N/A	#N/A	0.00151488	0.00151903	0.00522428
CDIF630erm_02612	nadA	quinolinate synthetase A	#N/A	#N/A	#N/A	#N/A	#N/A	#N/A	#N/A	#N/A	#N/A	#N/A	#N/A	#N/A	0.00490901	0.00521168	0.00392129
CDIF630erm_02662		putative peptidase C45	#N/A	#N/A	#N/A	#N/A	#N/A	#N/A	#N/A	#N/A	#N/A	#N/A	#N/A	#N/A	0.00627656	0.00191246	0.00428962
CDIF630erm_02822	mngB1	mannosylglycerate hydrolase	#N/A	#N/A	#N/A	#N/A	#N/A	#N/A	#N/A	#N/A	#N/A	#N/A	#N/A	#N/A	0.00782788	0.00290632	0.00569147
CDIF630erm_02835		putative metal-dependent peptidase	#N/A	#N/A	#N/A	#N/A	#N/A	#N/A	#N/A	#N/A	#N/A	#N/A	#N/A	#N/A	0.00193351	0.00547622	0.00314361
CDIF630erm_03039		putative glycosyl transferase, family 2	#N/A	#N/A	#N/A	#N/A	#N/A	#N/A	#N/A	#N/A	#N/A	#N/A	#N/A	#N/A	0.0053313	0.00141324	0.00466499
CDIF630erm_03088		hypothetical protein	#N/A	#N/A	#N/A	#N/A	#N/A	#N/A	#N/A	#N/A	#N/A	#N/A	#N/A	#N/A	0.00277883	0.00147995	0.00703863
CDIF630erm_03089		putative flavodoxin	#N/A	#N/A	#N/A	#N/A	#N/A	#N/A	#N/A	#N/A	#N/A	#N/A	#N/A	#N/A	0.0335867	0.00121705	0.00122085
CDIF630erm_03358	tagABC	PTS system, tagatose-specific IIABC component	#N/A	#N/A	#N/A	#N/A	#N/A	#N/A	#N/A	#N/A	#N/A	#N/A	#N/A	#N/A	0.00347507	0.00408164	0.0035036
CDIF630erm_03362	bglA2	6-phospho-beta-glucosidase	#N/A	#N/A	#N/A	#N/A	#N/A	#N/A	#N/A	#N/A	#N/A	#N/A	#N/A	#N/A	0.000130002	0.00322586	0.00266367
CDIF630erm_03514		putative methyltransferase	#N/A	#N/A	#N/A	#N/A	#N/A	#N/A	#N/A	#N/A	#N/A	#N/A	#N/A	#N/A	0.00121872	0.00380087	0.000927677
CDIF630erm_03759	kbaY	D-tagatose-1,6-bisphosphate aldolase	#N/A	#N/A	#N/A	#N/A	#N/A	#N/A	#N/A	#N/A	#N/A	#N/A	#N/A	#N/A	0.0027493	0.000719331	0.00491796
CDIF630erm_03938		transcriptional regulator, MerR family	#N/A	#N/A	#N/A	#N/A	#N/A	#N/A	#N/A	#N/A	#N/A	#N/A	#N/A	#N/A	0.00614329	0.00191945	0.000929093
